# Supplementary material for: Evaluation of Integrated Community Case Management in Eight Districts of Central Uganda
Source: PLoS One. 2015 Aug 12;10(8):e0134767. doi: 10.1371/journal.pone.0134767 (PMC4534192; doi:10.1371/journal.pone.0134767)
Supplement: S1 Dataset — http://dx.doi.org/10.6084/m9.figshare.1460836 (XLS) [file pone.0134767.s001.xls]

## Sheet: iccm_uganda_childhealth_min_dataset
survey	arm	hhid	childid	interaction	quintile	agehh	sexhh	hhsize	education	cough	fastbrea	seekcough	treat1c	treat2c	treat3c	othtrtc	source1c	source2c	source3c	othpubc	othpvtc	othsrcc	src1stc	timetrtc	fever	fstart	seekfever	source1f	source2f	source3f	othpubf	othpvtf	othsrcf	src1stf	timetrtf	drugsf	al	asaq	assp	timeal	ndal	srcal	othsrcal	timeasaq	ndasaq	srcasaq	othsrcassp	timeassp	ndassp
0	0	1040101	10401010204	0	3	28	1	4	2	2															2												2	2	2
0	0	1040102	10401020205	0	2	28	1	5	1	2															2												2	2	2
0	0	1040102	10401020204	0	2	28	1	5	1	2															2												2	2	2
0	0	1040103	10401030102	0	2	29	2	2	1	2															2												2	2	2
0	0	1040104	10401040102	0	2	43	2	5	1	1	1		D				C						C	3	2												2	2	2
0	0	1040105	10401050204	0	2	25	1	4	2	2															1	6		D						D	1	2	2	2	2
0	0	1040105	10401050203	0	2	25	1	4	2	2															2												2	2	2
0	0	1040106	10401060204	0	3	32	1	4	2	2															2												2	2	2
0	0	1040107	10401070102	0	2	45	2	2	1	2															2												2	2	2
0	0	1040108	10401080207	0	3	53	1	7	2	2															1	5		B						B	1	1	1	2	2	1	4	B
0	0	1040108	10401080206	0	3	53	1	7	2	2															2												2	2	2
0	0	1040109	10401090210	0	3	42	1	10	2	2															2												2	2	2
0	0	1040110	10401100205	0	2	30	1	5	1	2															2												2	2	2
0	0	1040111	10401110103	0	1	75	2	3	1	2															2												2	2	2
0	0	1040112	10401120206	0	2	62	1	8	1	1	2		D	G											2												2	2	2
0	0	1040112	10401120205	0	2	62	1	8	1	1	2		X			EGG & LEMON									2												2	2	2
0	0	1040113	10401130209	0	1	40	1	9	1	1	2		X			LOCAL MEDICINE									2												2	2	2
0	0	1040114	10401140205	0	2	51	1	5	1	2															2												2	2	2
0	0	1040115	10401150208	0	2	85	2	9	1	2															2												2	2	2
0	0	1040115	10401150209	0	2	85	2	9	1	2															2												2	2	2
0	0	1040116	10401160206	0	2	35	1	6	1	1	1		D	G			B	H					B	5	1	7		H						H	0	1	2	2	2
0	0	1040117	10401170105	0	3	42	2	5	1	1	1		B				G						G	0	1	7		G						G	0	1	2	2	2
0	0	1040118	10401180304	0	2	54	2	5	1	2															2												2	2	2
0	0	1040119	10401190208	0	3	45	1	8	1	1	2		D	X		VIT	G						G	1	2												2	2	2
0	0	1040120	10401200110	0	3	41	2	10	1	2															2												2	2	2
0	0	1040120	10401200304	0	3	41	2	10	1	1	2		X			LOCAL HERBS									1	14		D	G					D	1	1	2	2	2
0	0	1040121	10401210207	0	2	50	1	8	1	1	2		A												2												2	2	2
0	0	1040121	10401210208	0	2	50	1	8	1	1	2		A												2												2	2	2
0	0	1040122	10401220104	0	1	40	2	5	1	2															2												2	2	2
0	0	1040122	10401220105	0	1	40	2	5	1	2															1	3		A						A	1	1	1	2	2	1	3	B
0	0	1040123	10401230106	0	3	53	2	8	2	2															2												2	2	2
0	0	1040123	10401230107	0	3	53	2	8	2	2															2												2	2	2
0	0	1040123	10401230108	0	3	53	2	8	2	1	2		E												2												2	2	2
0	0	1040124	10401240104	0	1	34	2	4	1	1	2		X			FLUCAP									2												2	2	2
0	0	1040125	10401250204	0	2	25	1	4	2	2															2												2	2	2
0	0	1040126	10401260208	0	2	51	1	8	2	2															2												2	2	2
0	0	1040201	10402010206	0	1	60	2	7	0	2															1	7		A						A	2	1	2	2	2
0	0	1040201	10402010207	0	1	60	2	7	0	2															2												2	2	2
0	0	1040202	10402020210	0	1	38	1	10	1	1	2		B	D	X	AMPICILLIN	B						B	3	2												2	2	2
0	0	1040202	10402020209	0	1	38	1	10	1	2															2												2	2	2
0	0	1040203	10402030205	0	1	32	1	6	1	1	2		X			KOMBAT	D						D	7	1	7		C						C	3	1	1	2	2	3	4	B
0	0	1040203	10402030206	0	1	32	1	6	1	1	2		X			KOMBAT	D						D	7	2												2	2	2
0	0	1040204	10402040205	0	1	30	1	5	0	2															2												2	2	2
0	0	1040204	10402040204	0	1	30	1	5	0	2															2												2	2	2
0	0	1040205	10402050204	0	1	45	1	4	1	1	2		D												1	3		G						G	1	1	2	2	2
0	0	1040206	10402060208	0	3	45	1	9	1	2															1	3		C						C	1	1	2	2	2
0	0	1040207	10402070104	0	1	42	2	4	1	2															2												2	2	2
0	0	1040208	10402080207	0	2	39	1	7	2	2															2												2	2	2
0	0	1040209	10402090207	0	1	54	1	7	0	2															2												2	2	2
0	0	1040209	10402090206	0	1	54	1	7	0	1	2		A												2												2	2	2
0	0	1040210	10402100103	0	2	41	2	10	1	2															1	2		G	H					G	2	1	2	2	2
0	0	1040210	10402100104	0	2	41	2	10	1	2															2												2	2	2
0	0	1040211	10402110107	0	2	29	2	7	1	1	1		C	D	G		A						A	3	1	3		A						A	3	1	1	2	2	0	3	B
0	0	1040212	10402120102	0	2	44	2	5	1	1	1		X			HERBAL KABUTI									2												2	2	2
0	0	1040213	10402130203	0	2	54	1	6	2	2															2												2	2	2
0	0	1040213	10402130204	0	2	54	1	6	2	1	2		G												1	4										1	1	2	2	1	2	E
0	0	1040214	10402140103	0	2	27	2	3	2	1	1		C	D	G		A						A	1	2												2	2	2
0	0	1040215	10402150203	0	3	33	1	4	1	2															2												2	2	2
0	0	1040216	10402160204	0	1	37	1	9	1	1	1		Z												2												2	2	2
0	0	1040216	10402160203	0	1	37	1	9	1	1	1		Z												1	14		G						G	3	1	1	2	2	4	7	C
0	0	1040217	10402170204	0	2	29	1	4	2	1	1		C				B						B	2	2												2	2	2
0	0	1040217	10402170203	0	2	29	1	4	2	1	1		C				B						B	2	1	14		B						B	2	1	2	2	2
0	0	1040218	10402180208	0	1	38	1	8	1	1	1		X			KABUUTI	C						C	3	2												2	2	2
0	0	1040218	10402180207	0	1	38	1	8	1	1	1		X			KABUUTI	C						C	4	2												2	2	2
0	0	1040219	10402190204	0	2	37	1	7	1	1	1		A												1	4										1	2	2	2
0	0	1040219	10402190205	0	2	37	1	7	1	1	1		A												1	6										1	2	2	2
0	0	1040219	10402190203	0	2	37	1	7	1	1	1		A												1	3										1	2	2	2
0	0	1040220	10402200403	0	2	56	1	4	1	2															2												2	2	2
0	0	1040221	10402210204	0	3	56	1	8	4	2															1	3		C						C	5	1	1	2	2	4	3	B
0	0	1040221	10402210203	0	3	56	1	8	4	1	1		D	X		IBUREFEN	C						C	5	2												2	2	2
0	0	1040222	10402220204	0	2	26	1	5	1	2															2												2	2	2
0	0	1040222	10402220203	0	2	26	1	5	1	2															2												2	2	2
0	0	1040223	10402230104	0	2	44	2	4	1	2															2												2	2	2
0	0	1040224	10402240102	0	2	40	2	4	0	1	2		X			HERBS									1	1										2	2	2	2
0	0	1040225	10402250205	0	3	29	1	7	1	1	2		B	D											2												2	2	2
0	0	1040225	10402250203	0	3	29	1	7	1	1	2		B	G											2												2	2	2
0	0	1040226	10402260102	0	3	50	1	8	2	2															2												2	2	2
0	0	1040226	10402260203	0	3	50	1	8	2	2															1	14		E						E	0	2	2	2	2
0	0	1040301	10403010207	0	1	40	1	8	0	2															2												2	2	2
0	0	1040301	10403010208	0	1	40	1	8	0	2															2												2	2	2
0	0	1040302	10403020107	0	1	74	2	7	0	2															2												2	2	2
0	0	1040302	10403020106	0	1	74	2	7	0	2															2												2	2	2
0	0	1040303	10403030206	0	1	53	1	6	0	2															2												2	2	2
0	0	1040304	10403040505	0	1	70	2	6	0	2															2												2	2	2
0	0	1040304	10403040506	0	1	70	2	6	0	2															2												2	2	2
0	0	1040305	10403050204	0	1	46	1	4	0	2															2												2	2	2
0	0	1040305	10403050203	0	1	46	1	4	0	2															2												2	2	2
0	0	1040306	10403060206	0	2	23	1	7	2	2															2												2	2	2
0	0	1040306	10403060207	0	2	23	1	7	2	1	2		X			HERBS									2												2	2	2
0	0	1040306	10403060205	0	2	23	1	7	2	2															2												2	2	2
0	0	1040307	10403070204	0	1	45	1	4	1	2															2												2	2	2
0	0	1040307	10403070203	0	1	45	1	4	1	2															2												2	2	2
0	0	1040308	10403080203	0	2	38	1	3	2	2															2												2	2	2
0	0	1040309	10403090205	0	1	40	1	5	0	2															2												2	2	2
0	0	1040309	10403090204	0	1	40	1	5	0	2															2												2	2	2
0	0	1040310	10403100107	0	2	39	2	7	2	1	2		B	G			C	G					C	2	2												2	2	2
0	0	1040311	10403110203	0	1	23	1	3	1	2															1	0		C						C	0	1	1	2	2	0	3	B
0	0	1040313	10403130105	0	1	36	2	7	1	1	2		D	G			C	H					C	0	1	98		C						C	0	1	1	2	2	0	3	B
0	0	1040313	10403130107	0	1	36	2	7	1	1	2		D	G			C	H					C	0	1	98		C						C	0	1	1	2	2	0	3	B
0	0	1040313	10403130106	0	1	36	2	7	1	1	2		D	G			C	H					C	0	1	98		C						C	0	1	1	2	2	0	3	B
0	0	1040314	10403140205	0	2	35	1	6	2	2															2												2	2	2
0	0	1040314	10403140206	0	2	35	1	6	2	2															2												2	2	2
0	0	1040315	10403150102	0	2	38	2	4	1	1	2		C	G			C						C	1	1	2		C						C	0	1	1	2	2	0	3	B
0	0	1040316	10403160205	0	1	60	1	5	1	1	2		A				N						N	2	2												2	2	2
0	0	1040316	10403160204	0	1	60	1	5	1	2															2												2	2	2
0	0	1040317	10403170107	0	1	42	2	7	1	1	1		C	D			C						C	6	1	98		C						C	0	1	1	2	2	0	4	B
0	0	1040318	10403180105	0	2	50	2	6	1	2															2												2	2	2
0	0	1040318	10403180106	0	2	50	2	6	1	1	2		X			HERBS									2												2	2	2
0	0	1040319	10403190307	0	2	39	1	7	1	1	1		X			HERBAL	N						N	0	1	7		K						K	7	1	2	2	2
0	0	1040319	10403190306	0	2	39	1	7	1	1	1		X			HERBAL	N						N	0	1	7		K						K	7	1	2	2	2
0	0	1040320	10403200207	0	2	45	1	8	1	1	2		G	X		HERBAL	H						H	7	2												2	2	2
0	0	1040320	10403200208	0	2	45	1	8	1	1	2		G	X		HERBAL	H						H	7	2												2	2	2
0	0	1040321	10403210205	0	2	37	1	8	1	2															2												2	2	2
0	0	1040321	10403210206	0	2	37	1	8	1	2															2												2	2	2
0	0	1040321	10403210207	0	2	37	1	8	1	2															2												2	2	2
0	0	1040322	10403220203	0	3	50	1	6	2	1	2		E												2												2	2	2
0	0	1040323	10403230205	0	2	23	1	6	1	1	2		X			HEBAL	N						N	14	2												2	2	2
0	0	1040323	10403230206	0	2	23	1	6	1	1	2		X			HERBAL	N						N	14	1	4		A						A	4	1	1	2	2	0	3	B
0	0	1040324	10403240208	0	1	48	1	10	0	1	2														2												2	2	2
0	0	1040324	10403240206	0	1	48	1	10	0	1	2														2												2	2	2
0	0	1040324	10403240209	0	1	48	1	10	0	1	1		D				G						G	7	2												2	2	2
0	0	1040324	10403240210	0	1	48	1	10	0	1	1		X			HERBS									2												2	2	2
0	0	1040324	10403240207	0	1	48	1	10	0	1	2														2												2	2	2
0	0	1040325	10403250210	0	2	43	1	10	1	1	1		X			HERBS									2												2	2	2
0	0	1040325	10403250209	0	2	43	1	10	1	1	2														2												2	2	2
0	0	1040325	10403250208	0	2	43	1	10	1	1	2														2												2	2	2
0	0	1040326	10403260206	0	1	56	2	6	1	1	2														2												2	2	2
0	0	1040326	10403260205	0	1	56	2	6	1	1	1		X			COUGH LINGTUS	N						N	25	2												2	2	2
0	0	1040401	10404010205	0	1	35	1	6	1	1	1		X			HERBS									2												2	2	2
0	0	1040401	10404010206	0	1	35	1	6	1	1	1		X			HERBS									2												2	2	2
0	0	1040402	10404020210	0	2	45	1	11	1	1	1		C	X		BRO-ZEDEX									2												2	2	2
0	0	1040402	10404020209	0	2	45	1	11	1	1	1		C	X		BRO-ZEDEX									2												2	2	2
0	0	1040402	10404020411	0	2	45	1	11	1	1	1		C	X		BRO-ZEDEX									2												2	2	2
0	0	1040403	10404030107	0	2	34	2	7	0	1	1		X			COTDRIL									1	5										1	2	2	2
0	0	1040404	10404040308	0	2	64	2	9	1	1	1		C	D											1	7		D						D	2	1	2	2	2
0	0	1040405	10404050205	0	2	26	1	5	1	2															2												2	2	2
0	0	1040406	10404060209	0	1	37	1	10	1	2															2												2	2	2
0	0	1040406	10404060210	0	1	37	1	10	1	2															2												2	2	2
0	0	1040406	10404060208	0	1	37	1	10	1	2															2												2	2	2
0	0	1040407	10404070208	0	1	51	1	8	1	2															2												2	2	2
0	0	1040408	10404080204	0	2	26	1	4	1	1	2		X			LOCAL MEDICINE									2												2	2	2
0	0	1040408	10404080203	0	2	26	1	4	1	1	1		D				C						C	2	2												2	2	2
0	0	1040409	10404090309	0	1	55	2	10	0	2															2												2	2	2
0	0	1040409	10404090308	0	1	55	2	10	0	2															2												2	2	2
0	0	1040409	10404090307	0	1	55	2	10	0	2															2												2	2	2
0	0	1040410	10404100207	0	1	58	1	7	0	1	1		C				H						H	2	2												2	2	2
0	0	1040411	10404110204	0	1	37	1	6	1	2															2												2	2	2
0	0	1040411	10404110205	0	1	37	1	6	1	2															2												2	2	2
0	0	1040411	10404110206	0	1	37	1	6	1	2															2												2	2	2
0	0	1040412	10404120204	0	1	40	1	4	0	2															2												2	2	2
0	0	1040412	10404120205	0	1	40	1	4	0	2															2												2	2	2
0	0	1040413	10404130206	0	1	53	1	6	1	2															2												2	2	2
0	0	1040414	10404140106	0	1	32	2	7	0	2															2												2	2	2
0	0	1040415	10404150203	0	2	37	1	7	1	2															2												2	2	2
0	0	1040416	10404160207	0	2	65	1	7	1	2															2												2	2	2
0	0	1040417	10404170208	0	2	38	1	9	1	1	2		A												2												2	2	2
0	0	1040418	10404180207	0	2	41	1	7	2	2															2												2	2	2
0	0	1040419	10404190203	0	2	27	1	3	1	1	2		C	G			H						H	2	2												2	2	2
0	0	1040420	10404200203	0	2	26	1	3	2	2															2												2	2	2
0	0	1040421	10404210203	0	2	25	1	3	2	2															2												2	2	2
0	0	1040422	10404220103	0	1	38	2	3	1	1	1		G				H						H	2	2												2	2	2
0	0	1040422	10404220102	0	1	38	2	3	1	1	2														2												2	2	2
0	0	1040423	10404230206	0	2	45	1	7	1	1	1		A												2												2	2	2
0	0	1040423	10404230207	0	2	45	1	7	1	1	2		A												2												2	2	2
0	0	1040424	10404240108	0	2	34	2	8	2	2															2												2	2	2
0	0	1040425	10404250307	0	2	52	1	7	1	2															2												2	2	2
0	0	1040426	10404260206	0	1	40	1	6	1	2															2												2	2	2
0	0	1040501	10405010104	0	2	52	1	4	1	2															2												2	2	2
0	0	1040502	10405020206	0	2	28	1	6	1	1	2		G				C						C	3	2												2	2	2
0	0	1040503	10405030105	0	3	50	2	5	1	2															2												2	2	2
0	0	1040503	10405030104	0	3	50	2	5	1	2															2												2	2	2
0	0	1040503	10405030102	0	3	50	2	5	1	2															2												2	2	2
0	0	1040503	10405030103	0	3	50	2	5	1	2															2												2	2	2
0	0	1040504	10405040203	0	3	36	1	3	2	1	2		G				C						C	2	1	3										2	2	2	2
0	0	1040505	10405050206	0	2	48	1	6	1	2															1	3		G						G	1	1	2	2	2
0	0	1040506	10405060107	0	1	58	2	7	1	1	1		C	D	G		G						G	2	1	2		G						G	2	1	1	2	2	0	3	C
0	0	1040506	10405060104	0	1	58	2	7	1	1	2		C	D	G		G						G	3	2												2	2	2
0	0	1040507	10405070203	0	3	33	1	7	2	2															1	1										2	2	2	2
0	0	1040507	10405070204	0	3	33	1	7	2	2															2												2	2	2
0	0	1040508	10405080108	0	2	34	2	8	0	1	2		B	C	X	LOCAL HERBS	C						C	2	2												2	2	2
0	0	1040509	10405090203	0	3	60	1	8	1	1	1		E	G			H						H	7	2												2	2	2
0	0	1040510	10405100203	0	3	38	1	5	1	1	2		E				C						C	2	2												2	2	2
0	0	1040511	10405110203	0	2	45	1	7	1	1	1		A				C						C	3	1	3										2	2	2	2
0	0	1040511	10405110204	0	2	45	1	7	1	1	1		A				C						C	2	1	2										2	2	2	2
0	0	1040512	10405120203	0	3	30	1	5	4	2															2												2	2	2
0	0	1040513	10405130203	0	3	35	1	3	4	2															2												2	2	2
0	0	1040514	10405140203	0	2	35	1	4	1	1	2		X			HERBAL	N						N	2	2												2	2	2
0	0	1040514	10405140204	0	2	35	1	4	1	1	2		X			HERBAL	N						N	2	2												2	2	2
0	0	1040515	10405150207	0	1	37	1	7	1	1	1		X			HERBAL	G						G	3	2												2	2	2
0	0	1040515	10405150206	0	1	37	1	7	1	2															2												2	2	2
0	0	1040516	10405160209	0	1	40	1	9	1	2															2												2	2	2
0	0	1040517	10405170109	0	1	48	2	9	1	1	2		X			HERBAL									2												2	2	2
0	0	1040518	10405180207	0	1	38	1	8	1	2															2												2	2	2
0	0	1040518	10405180208	0	1	38	1	8	1	1	2		D				G						G		1	0		C						C	4	1	1	2	2	0	3
0	0	1040519	10405190206	0	2	40	1	8	1	2															2												2	2	2
0	0	1040519	10405190207	0	2	40	1	8	1	2															2												2	2	2
0	0	1040519	10405190208	0	2	40	1	8	1	1	1		D				C						C	0	1	98										1	2	2	2
0	0	1040520	10405200314	0	2	35	1	14	2	1	2		G				C						C	0	1	2		C						C		1	1	2	2	0	3	B
0	0	1040520	10405200212	0	2	35	1	14	2	1	2		C	G			C						C	7	1	98		C						C	0	1	1	2	2	0	3
0	0	1040520	10405200213	0	2	35	1	14	2	1	2		C	G			C						C	7	1	98		C						C	0	1	1	2	2	0	3
0	0	1040521	10405210205	0	1	68	2	5	0	2															2												2	2	2
0	0	1040522	10405220306	0	1	46	2	10	0	2															2												2	2	2
0	0	1040523	10405230103	0	2	46	2	3	2	2															1	7		C						C	0	1	1	2	2	0	3	B
0	0	1040524	10405240111	0	1	36	2	14	0	1	2		E												1	3		C						C		1	1	2	2	0	3	B
0	0	1040524	10405240113	0	1	36	2	14	0	1	1		E				C						C	0	2												2	2	2
0	0	1040524	10405240112	0	1	36	2	14	0	1	1		E				C						C	0	1	4		C						C	4	2	2	2	2
0	0	1040524	10405240114	0	1	36	2	14	0	1	2		C	E			C						C	0	2												2	2	2
0	0	1040525	10405250206	0	2	50	1	6	4	1	2		G				C						C	0	2												2	2	2
0	0	1040525	10405250205	0	2	50	1	6	4	1	2		G				C						C	0	2												2	2	2
0	0	1040526	10405260214	0	2		1	14	1	1	2		A												2												2	2	2
0	0	1040526	10405260213	0	2		1	14	1	1	2		A												2												2	2	2
0	0	1040526	10405260212	0	2		1	14	1	1	2		A												1	1		N							1	2	2	2	2
0	0	1040601	10406010203	0	3	25	1	3	1	1	1		X			COLDEASE	J						J	2	1	7		J						J	3	1	2	2	2
0	0	1040602	10406020204	0	3	35	1	6	4	1	2		G				H						H	2	2												2	2	2
0	0	1040602	10406020203	0	3	35	1	6	4	2															2												2	2	2
0	0	1040603	10406030203	0	3	32	1	7	1	2															2												2	2	2
0	0	1040604	10406040203	0	3	40	1	4	1	2															2												2	2	2
0	0	1040605	10406050203	0	3	62	1	6	1	1	2		E				L				HEALTH CENTRE 2		L	0	2												2	2	2
0	0	1040606	10406060203	0	3	25	1	3	1	1	1		D	X		KABUTI	G						G	2	1	7		G						G	2	1	2	2	2
0	0	1040607	10406070204	0	3	32	1	4	3	2															2												2	2	2
0	0	1040607	10406070203	0	3	32	1	4	3	2															2												2	2	2
0	0	1040608	10406080207	0	2	38	1	7	1	1	1		D	G			G						G	2	2												2	2	2
0	0	1040608	10406080206	0	2	38	1	7	1	1	1		D	G			G						G	2	2												2	2	2
0	0	1040609	10406090210	0	3	45	1	10	1	2															2												2	2	2
0	0	1040610	10406101108	0	3	24	2	12	2	2															2												2	2	2
0	0	1040610	10406100110	0	3	24	2	12	2	1	2		D				G						G	3	2												2	2	2
0	0	1040611	10406110105	0	3	26	2	5	1	2															2												2	2	2
0	0	1040612	10406120104	0	3	26	2	5	2	1	1		X			AMPICILINE	G						G	1	2												2	2	2
0	0	1040612	10406120103	0	3	26	2	5	2	1	2		D				G						G	3	2												2	2	2
0	0	1040613	10406130103	0	1	33	2	4	1	1	1		D	G			C	G					G	7	2												2	2	2
0	0	1040614	10406140204	0	3	31	1	4	3	1	8		D				G						G	2	2												2	2	2
0	0	1040615	10406150204	0	1	41	1	5	1	2															2												2	2	2
0	0	1040615	10406150205	0	1	41	1	5	1	2															2												2	2	2
0	0	1040616	10406160208	0	3	38	1	8	2	1	2		G				G						G	0	2												2	2	2
0	0	1040617	10406170107	0	1	42	2	7	0	1	2		A												2												2	2	2
0	0	1040617	10406170106	0	1	42	2	7	0	2															2												2	2	2
0	0	1040618	10406180103	0	3	30	2	3	4	1	2		G												2												2	2	2
0	0	1040618	10406180102	0	3	30	2	3	4	1	2		A												2												2	2	2
0	0	1040619	10406190208	0	1	60	1	9	1	1	2		D												2												2	2	2
0	0	1040620	10406200208	0	2	44	1	8	1	1	1		G				G						G	4	2												2	2	2
0	0	1040621	10406210107	0	2	40	2	7	2	2															2												2	2	2
0	0	1040622	10406220205	0	2	26	1	5	2	1	1		G				A						A	4	2												2	2	2
0	0	1040622	10406220204	0	2	26	1	5	2	1	1		G				A						A	4	2												2	2	2
0	0	1040623	10406230307	0	2	85	2	7	1	1	2		G	X		FLUPCAP	H						H	1	2												2	2	2
0	0	1040623	10406230306	0	2	85	2	7	1	1	2		G	X		FLUCAP	H						H	1	2												2	2	2
0	0	1040624	10406240305	0	2	73	2	6	0	2															2												2	2	2
0	0	1040624	10406240306	0	2	73	2	6	0	2															2												2	2	2
0	0	1040625	10406250207	0	3	45	1	7	2	2															2												2	2	2
0	0	1040626	10406260308	0	2	42	1	10	4	1	2		B	G	X	VIT.C	H						H	0	2												2	2	2
0	0	1040626	10406260309	0	2	42	1	10	4	1	2		B	G	X	VIT C	H						H	0	2												2	2	2
0	0	1040626	10406260310	0	2	42	1	10	4	1	2		B	X		VITAMIN C	H						H	0	2												2	2	2
0	0	1040701	10407010306	0	3	50	2	6	1	2															2												2	2	2
0	0	1040701	10407010305	0	3	50	2	6	1	2															2												2	2	2
0	0	1040702	10407020104	0	3	38	2	5	4	1	1		G												2												2	2	2
0	0	1040702	10407020105	0	3	38	2	5	4	1	1		G												2												2	2	2
0	0	1040703	10407030206	0	3	40	2	10	4	1	1		X			HERBS									2												2	2	2
0	0	1040703	10407030207	0	3	40	2	10	4	1	1		X			HERBS									1	7										1	1	2	2	0	1	A
0	0	1040703	10407030109	0	3	40	2	10	4	1	1		X			HERBS									2												2	2	2
0	0	1040703	10407030208	0	3	40	2	10	4	1	1		X			HERBS									2												2	2	2
0	0	1040704	10407040208	0	3	40	1	8	1	1	1		G	X		HERBS	H						H	2	1	7										1	2	2	2
0	0	1040705	10407050208	0	3	33	1	8	1	1	1		X			EXPEN	A						A	7	2												2	2	2
0	0	1040706	10407060205	0	3	35	1	7	3	1	1		G												2												2	2	2
0	0	1040707	10407070205	0	3	52	2	5	2	1	2		X			HERB	A						A	2	2												2	2	2
0	0	1040708	10407080208	0	3	38	1	8	1	1	1		X			AMPHEN									2												2	2	2
0	0	1040708	10407080207	0	3	38	1	8	1	1	1		X			AMPHEN									2												2	2	2
0	0	1040709	10407090106	0	1	52	2	6	1	1	1		C	D	G		C						C	3	1	3		C						C	0	1	2	2	2
0	0	1040710	10407100105	0	2	53	2	5	2	1	2		D												2												2	2	2
0	0	1040711	10407110106	0	3	30	2	6	2	1	2		C	D											1	14		G						G	0	1	2	2	2
0	0	1040712	10407120206	0	3	31	1	6	2	2															2												2	2	2
0	0	1040712	10407120205	0	3	31	1	6	2	2															2												2	2	2
0	0	1040713	10407130205	0	3	35	1	6	2	2															2												2	2	2
0	0	1040714	10407140205	0	1	39	1	5	1	1	1		C	G											2												2	2	2
0	0	1040715	10407150207	0	2	32	1	7	1	1	2		G				C						C	3	2												2	2	2
0	0	1040716	10407160206	0	3	37	1	6	2	2															2												2	2	2
0	0	1040717	10407170206	0	3	27	1	6	3	1	2		G											2	1	10		C						C	0	1	1	2	2	0	3	B
0	0	1040717	10407170205	0	3	27	1	6	3	2															2												2	2	2
0	0	1040718	10407180213	0	3	54	1	13	4	1	1		G				G						G	1	2												2	2	2
0	0	1040719	10407190113	0	3	61	2	13	1	2															1	2		E						E		1	2	2	2
0	0	1040720	10407200208	0	3	35	1	8	2	1	2		D				H						H	2	2												2	2	2
0	0	1040721	10407210207	0	2	54	2	7	1	1	1		Z				H						H	2	1	7										2	2	2	2
0	0	1040722	10407220206	0	3	30	1	6	2	1	2		D				J						J	1	1	1		C						C	1	1	1	2	2	1	4	B
0	0	1040723	10407230205	0	3	30	1	5	2	1	2		X			LOCAL HERBS	N						N	1	2												2	2	2
0	0	1040723	10407230204	0	3	30	1	5	2	1	2		X			LOCAL HERBS	N						N	1	2												2	2	2
0	0	1040724	10407240206	0	3	45	1	6	2	1	2		G				J						J	0	2												2	2	2
0	0	1040725	10407250209	0	3	35	1	9	1	2															2												2	2	2
0	0	1040725	10407250208	0	3	35	1	9	1	2															2												2	2	2
0	0	1040725	10407250207	0	3	35	1	9	1	2															2												2	2	2
0	0	1040726	10407260204	0	2	28	1	4	1	1	2		X			COLDERFEX	J						J	3	2												2	2	2
0	0	1040726	10407260203	0	2	28	1	4	1	1	2		X			COLDERFEX	J						J	3	2												2	2	2
0	0	1040801	10408010204	0	3	32	1	4	1	2															2												2	2	2
0	0	1040802	10408020204	0	3	39	1	5	2	2															2												2	2	2
0	0	1040802	10408020205	0	3	39	1	5	2	2															1	14		D						D	3	1	2	2	2
0	0	1040803	10408030207	0	3	40	1	7	4	2															2												2	2	2
0	0	1040803	10408030206	0	3	40	1	7	4	2															1	3										1	1	2	2	0	2	A
0	0	1040804	10408040205	0	3	37	1	5	3	2															2												2	2	2
0	0	1040805	10408050106	0	3	35	2	6	1	2															2												2	2	2
0	0	1040806	10408060306	0	3	45	1	6	1	2															2												2	2	2
0	0	1040807	10408070205	0	3	46	1	5	4	2															2												2	2	2
0	0	1040808	10408080304	0	3	57	1	4	2	1	2		C	D	G		B						B	4	2												2	2	2
0	0	1040809	10408090210	0	3	40	1	10	2	2															2												2	2	2
0	0	1040809	10408090211	0	3	40	1	10	2	2															2												2	2	2
0	0	1040810	10408100207	0	3	42	1	7	2	1	2		G				H						H	3	2												2	2	2
0	0	1040811	10408110204	0	3	35	1	4	3	2															2												2	2	2
0	0	1040811	10408110203	0	3	35	1	4	3	1	1		D	G			G						G	2	2												2	2	2
0	0	1040812	10408120205	0	3	43	1	6	1	1	2														2												2	2	2
0	0	1040812	10408120206	0	3	43	1	6	1	1	1		A												2												2	2	2
0	0	1040813	10408130209	0	3	38	1	9	1	2															2												2	2	2
0	0	1040813	10408130208	0	3	38	1	9	1	2															2												2	2	2
0	0	1040813	10408130207	0	3	38	1	9	1	2															2												2	2	2
0	0	1040814	10408140203	0	3	42	1	3	2	1	2		B	X		PIRITEX	G						G	3	2												2	2	2
0	0	1040815	10408150204	0	3	29	1	7	2	2															1	7		C						C	3	1	1	2	2	2	4	C
0	0	1040815	10408150207	0	3	29	1	7	2	2															1	7		C						C	3	1	1	2	2	2	4	C
0	0	1040815	10408150206	0	3	29	1	7	2	2															2												2	2	2
0	0	1040816	10408160204	0	3	30	1	9	2	1	2		D	X		MEDICLOAUP	J						J	3	2												2	2	2
0	0	1040816	10408160203	0	3	30	1	9	2	1	1		D	X		MEDICLOAMP	J						J	3	2												2	2	2
0	0	1040817	10408170209	0	3	47	1	9	2	1	2		D				G						G	2	2												2	2	2
0	0	1040818	10408180207	0	3	45	1	7	4	1	2		D	G			G						G	3	1	7										2	2	2	2
0	0	1040819	10408190103	0	3	29	2	6	2	2															2												2	2	2
0	0	1040819	10408190104	0	3	29	2	6	2	2															1	3		C	G					C	3	1	2	2	2
0	0	1040820	10408200107	0	3	32	2	9	2	2															2												2	2	2
0	0	1040820	10408200109	0	3	32	2	9	2	2															2												2	2	2
0	0	1040821	10408210103	0	3	22	2	3	2	1	1		A												2												2	2	2
0	0	1040822	10408220802	0	3	60	1	8	1	1	2		G	X		PIRITON,VIT C	H						H	2	2												2	2	2
0	0	1040822	10408220803	0	3	60	1	8	1	1	2		G	X		PIRITON,VIT C	F			HEALTH CENTRE 4			F	1	2												2	2	2
0	0	1040823	10408230203	0	3	32	1	4	3	1	2		G	X		VIT C	F	H		HEALTH CENTER 4			F	2	1	2		F			HEALTH CENTER 4			F	0	2	2	2	2
0	0	1040823	10408230204	0	3	32	1	4	3	2															2												2	2	2
0	0	1040824	10408240406	0	3	80	2	9	1	1	2		C	D			F			HEART CENTRE 4			F	2	1	14		F			HEALTH CENTRE			F	2	1	1	2	2	1	4	B
0	0	1040824	10408240405	0	3	80	2	9	1	1	1		A												1	10										2	2	2	2
0	0	1040825	10408250204	0	3	38	1	8	2	2															2												2	2	2
0	0	1040825	10408250203	0	3	38	1	8	2	2															2												2	2	2
0	0	1040826	10408260204	0	3	60	1	6	4	2															2												2	2	2
0	0	1040826	10408260203	0	3	60	1	6	4	2															2												2	2	2
0	0	1040901	10409010203	0	3	60	1	3	4	1	2		B	C	X	COLDCAP	C						C	2	2												2	2	2
0	0	1040902	10409020207	0	1	45	1	8	0	2															1	4		G						G	1	1	2	2	2
0	0	1040903	10409030205	0	3	38	1	5	1	1	2		B				G						G	4	2												2	2	2
0	0	1040904	10409040209	0	3	46	1	9	1	1	2		D				G						G	12	2												2	2	2
0	0	1040905	10409050207	0	2	43	1	8	1	1	2		B	C			C						C	3	1	7		C						C	3	1	1	2	2	3	4	B
0	0	1040905	10409050208	0	2	43	1	8	1	1	2		B	C			C						C	3	1	7		C						C	3	1	1	2	2	3	4	B
0	0	1040906	10409060205	0	2	50	1	6	1	2															2												2	2	2
0	0	1040907	10409070205	0	3	50	1	5	2	1	2		B	D			C						C	2	2												2	2	2
0	0	1040908	10409080206	0	3	33	1	6	2	1	2		B				C						C	3	1	3		C						C	3	1	1	2	2	3	5	B
0	0	1040909	10409090205	0	3	32	1	7	2	2															2												2	2	2
0	0	1040909	10409090207	0	3	32	1	7	2	2															2												2	2	2
0	0	1040910	10409100103	0	1	32	2	3	1	2															2												2	2	2
0	0	1040911	10409110104	0	2	57	2	8	0	1	1		B												2												2	2	2
0	0	1040911	10409110103	0	2	57	2	8	0	1	1		B												2												2	2	2
0	0	1040911	10409110102	0	2	57	2	8	0	1	1		B												2												2	2	2
0	0	1040912	10409120208	0	2	47	1	11	1	2															2												2	2	2
0	0	1040912	10409120209	0	2	47	1	11	1	2															2												2	2	2
0	0	1040913	10409130105	0	1	29	2	5	0	2															2												2	2	2
0	0	1040914	10409140207	0	3	35	1	7	2	1	1		D	G			C						C	1	1	4		C						C	1	1	1	2	2	0	3	B
0	0	1040915	10409150106	0	3	35	2	7	1	2															2												2	2	2
0	0	1040916	10409160106	0	3	28	2	6	1	1	1		E				G						G	1	1	2		G						G	1	1	2	2	2
0	0	1040917	10409170204	0	3	30	1	4	3	1	2		B	D			G						G	2	1	4		G						G	2	1	2	2	2
0	0	1040918	10409180203	0	3	50	1	7	0	1	2		A												2												2	2	2
0	0	1040918	10409180204	0	3	50	1	7	0	1	2		A												2												2	2	2
0	0	1040919	10409190203	0	2	39	1	8	1	1	2		G	X		HERBAL MEDICINE									2												2	2	2
0	0	1040919	10409190204	0	2	39	1	8	1	2															2												2	2	2
0	0	1040920	10409200203	0	3	36	1	6	2	1	1		X			VITAMIN C & KABUUTI	X					RELATIVES	X	2	1	3		H						H	2	1	1	2	2	2	2	C
0	0	1040921	10409210102	0	1	70	2	3	1	1	2		D				H						H	2	2												2	2	2
0	0	1040921	10409210103	0	1	70	2	3	1	1	1		D				H						H	0	2												2	2	2
0	0	1040922	10409220203	0	3	30	1	4	1	1	2		C	G			E	J					E	2	2												2	2	2
0	0	1040923	10409230203	0	3	32	1	6	2	2															2												2	2	2
0	0	1040923	10409230204	0	3	32	1	6	2	2															2												2	2	2
0	0	1040924	10409240203	0	3	39	1	11	1	1	2		A												2												2	2	2
0	0	1040924	10409240204	0	3	39	1	11	1	2															2												2	2	2
0	0	1040925	10409250204	0	3	39	1	8	2	1	2		X			COUGH LINCTUS	A						A	4	2												2	2	2
0	0	1040925	10409250203	0	3	39	1	8	2	1	1		X			COUGH LINCTUS	A						A	3	1	7		A						A	3	1	2	2	2
0	0	1041001	10410010103	0	1	27	2	3	1	2															2												2	2	2
0	0	1041002	10410020102	0	1	20	2	2	1	1	2		E												2												2	2	2
0	0	1041003	10410030205	0	1	30	1	5	1	2															2												2	2	2
0	0	1041004	10410040206	0	2	38	1	7	1	2															2												2	2	2
0	0	1041004	10410040207	0	2	38	1	7	1	2															2												2	2	2
0	0	1041005	10410050506	0	1	87	1	7	1	1	2		G				G						G		1	98		G						G	0	1	2	2	2
0	0	1041005	10410050507	0	1	87	1	7	1	1	2		G				G						G		1	98		G						G	0	1	2	2	2
0	0	1041006	10410060203	0	1	47	1	7	0	2															1	0		C						C		1	2	2	2
0	0	1041007	10410070204	0	1	23	1	4	1	2															2												2	2	2
0	0	1041007	10410070203	0	1	23	1	4	1	1	2		G				G						G	0	2												2	2	2
0	0	1041008	10410080213	0	2	30	1	5	1	2															2												2	2	2
0	0	1041008	10410080214	0	2	30	1	5	1	2															2												2	2	2
0	0	1041008	10410080215	0	2	30	1	5	1	1	2		C	G			G						G	0	2												2	2	2
0	0	1041009	10410090205	0	1	27	1	5	1	2															2												2	2	2
0	0	1041010	10410100203	0	1	80	1	3	0	1	1		X			LINCTUS	H						H	5	1	3		G						G	3	1	1	2	2	2	3	B
0	0	1041011	10410110207	0	2	34	1	7	1	2															2												2	2	2
0	0	1041011	10410110206	0	2	34	1	7	1	1	2		X			HERBS		N							2												2	2	2
0	0	1041011	10410110205	0	2	34	1	7	1	1	2		X			HERBS									2												2	2	2
0	0	1041012	10410120210	0	2	58	2	12	0	1	1		E				J						J	2	2												2	2	2
0	0	1041013	10410130206	0	2	48	1	6	1	1	1		X			HERBS									1	4		H						H	1	1	2	2	2
0	0	1041015	10410150210	0	1	55	2	10	0	1	2		X			HERBS									2												2	2	2
0	0	1041016	10410160105	0	1	48	2	5	0	2															2												2	2	2
0	0	1041017	10410170103	0	1	45	2	3	0	2															2												2	2	2
0	0	1041018	10410180204	0	1	40	1	4	0	1	2		D				G						G	3	2												2	2	2
0	0	1041019	10410190305	0	1	34	1	10	0	1	2		G				H						H	0	2												2	2	2
0	0	1041019	10410190304	0	1	34	1	10	0	1	2		G				H						H	0	2												2	2	2
0	0	1041020	10410200206	0	2	50	1	6	1	2															1	2		X					HERBS	X	2	2	2	2	2
0	0	1041021	10410210204	0	1	60	1	5	1	2															2												2	2	2
0	0	1041021	10410210203	0	1	60	1	5	1	2															2												2	2	2
0	0	1041021	10410210205	0	1	60	1	5	1	1	2		G				C						C	0	2												2	2	2
0	0	1041022	10410220204	0	2	23	1	4	1	1	1		D				H						H	3	1	98		C						C		1	1	2	2	0	3	B
0	0	1041022	10410220107	0	2	23	1	4	1	1	2		X			HERBS								2	2												2	2	2
0	0	1041022	10410220108	0	2	23	1	4	1	1	2		X			HERBS								2	2												2	2	2
0	0	1041022	10410220109	0	2	23	1	4	1	2															2												2	2	2
0	0	1041023	10410230205	0	2	41	1	7	1	1	1		A	X		HERBS									2												2	2	2
0	0	1041023	10410230207	0	2	41	1	7	1	1	1		A	X		HERBS									2												2	2	2
0	0	1041024	10410240204	0	2	40	2	8	1	1	2		A												1												2	2	2
0	0	1041025	10410250205	0	3	26	1	4	2	1	2		E				G						G	0	1	7		G						G	0	1	1	2	2	0	3	C
0	0	1041026	10410260204	0	2	56	1	4	1	1	2		C	E			J						J	0	1	7		J						J	0	1	1	2	2	0	3	C
0	0	1041101	10411010205	0	3	47	2	5	2	1	2		A												2												2	2	2
0	0	1041102	10411020102	0	1	50	2	6	0	1	1		Z				H						H	1	2												2	2	2
0	0	1041103	10411030102	0	1	37	2	5	0	2															1	1		H						H	0	1	2	2	2
0	0	1041104	10411040205	0	2	39	1	5	2	2															1	4										1	1	2	2	0	2	C
0	0	1041105	10411050203	0	1	29	1	4	1	2															2												2	2	2
0	0	1041105	10411050204	0	1	29	1	4	1	2															2												2	2	2
0	0	1041106	10411060103	0	1	70	2	3		2															2												2	2	2
0	0	1041107	10411070203	0	2	30	1	6	1	2															2												2	2	2
0	0	1041107	10411070205	0	2	30	1	6	1	2															2												2	2	2
0	0	1041107	10411070204	0	2	30	1	6	1	2															2												2	2	2
0	0	1041108	10411080108	0	1	80	2	8		2															2												2	2	2
0	0	1041109	10411090104	0	1	34	2	6	1	2															2												2	2	2
0	0	1041109	10411090102	0	1	34	2	6	1	2															1	10		B						B	2	1	1	2	2	2	2	B
0	0	1041110	10411100205	0	2	32	1	5	2	2															2												2	2	2
0	0	1041110	10411100204	0	2	32	1	5	2	2															2												2	2	2
0	0	1041110	10411100203	0	2	32	1	5	2	2															2												2	2	2
0	0	1041111	10411110205	0	3	29	1	7	1	2															2												2	2	2
0	0	1041111	10411110204	0	3	29	1	7	1	2															2												2	2	2
0	0	1041111	10411110203	0	3	29	1	7	1	2															2												2	2	2
0	0	1041112	10411120207	0	3	40	1	7	1	2															2												2	2	2
0	0	1041112	10411120203	0	3	40	1	7	1	1	1		D				C						C	1	2												2	2	2
0	0	1041113	10411130203	0	3	40	1	5	2	2															2												2	2	2
0	0	1041114	10411140209	0	3	35	1	10	2	2															2												2	2	2
0	0	1041114	10411140208	0	3	35	1	10	2	2															2												2	2	2
0	0	1041114	10411140210	0	3	35	1	10	2	2															2												2	2	2
0	0	1041115	10411150204	0	2	32	1	4	1	1	1		A												2												2	2	2
0	0	1041115	10411150203	0	2	32	1	4	1	1	1		A												2												2	2	2
0	0	1041116	10411160110	0	2	35	2	12	1	1	2		D				G						G	14	1	4		C						C	7	1	1	2	2	4	4	X
0	0	1041116	10411160112	0	2	35	2	12	1	1	2		D				G						G	14	2												2	2	2
0	0	1041116	10411160111	0	2	35	2	12	1	2															2												2	2	2
0	0	1041117	10411170103	0	1	57	2	6	0	1	2		B				C						C	3	2												2	2	2
0	0	1041118	10411180802	0	2	52	1	8		1	1		D	F	X	COLD EASE SYRUP	H						H	3	1	14		H						H	2	1	1	2	2	0	3	C
0	0	1041119	10411190203	0	3	34	1	4	2	2															1	7										2	2	2	2
0	0	1041119	10411190204	0	3	34	1	4	2	2															2												2	2	2
0	0	1041120	10411200203	0	3	33	1	5	2	2															1	9		C						C	0	1	1	2	2	0	3	B
0	0	1041121	10411210204	0	3	35	1	4	2	2															2												2	2	2
0	0	1041121	10411210203	0	3	35	1	4	2	1	1		D	X		FERRO B SYRUP, VIT C	H						H	0	1	7		H						H	0	1	1	2	2	1	3	C
0	0	1041122	10411220203	0	1	69	1	5	0	1	1		C	D			C						C	0	2												2	2	2
0	0	1041123	10411230203	0	3	56	1	3	3	2															2												2	2	2
0	0	1041124	10411240203	0	2	36	1	8	1	1	1		G	X		COLD EASE SYRUP	J						J	2	1	7		C						C	2	1	2	2	2
0	0	1041124	10411240204	0	2	36	1	8	1	1	1		G	X		COLD EASE SYRUP	J						J	3	1	7		C						C	2	1	2	2	2
0	0	1041125	10411250103	0	2	30	2	3	1	1	1		B				C						C	2	2												2	2	2
0	0	1041126	10411260103	0	3	19	2	3	2	2															1	3		C						C	0	1	2	2	2
0	0	1041201	10412010208	0	3	44	1	9	2	2															2												2	2	2
0	0	1041201	10412010209	0	3	44	1	9	2	1	1		D												2												2	2	2
0	0	1041202	10412020205	0	3	32	1	5	2	2															2												2	2	2
0	0	1041202	10412020204	0	3	32	1	5	2	2															2												2	2	2
0	0	1041203	10412030207	0	2	38	1	7	1	2															2												2	2	2
0	0	1041203	10412030206	0	2	38	1	7	1	2															2												2	2	2
0	0	1041204	10412040204	0	2	25	1	4	2	2															2												2	2	2
0	0	1041204	10412040203	0	2	25	1	4	2	2															2												2	2	2
0	0	1041205	10412050203	0	3	30	1	4	1	2															2												2	2	2
0	0	1041205	10412050204	0	3	30	1	4	1	2															2												2	2	2
0	0	1041206	10412060205	0	2	30	1	5	1	2															2												2	2	2
0	0	1041206	10412060204	0	2	30	1	5	1	2															2												2	2	2
0	0	1041207	10412070205	0	2	30	1	6	2	2															2												2	2	2
0	0	1041207	10412070206	0	2	30	1	6	2	2															2												2	2	2
0	0	1041208	10412080203	0	3	32	1	5	2	2															2												2	2	2
0	0	1041208	10412080205	0	3	32	1	5	2	2															2												2	2	2
0	0	1041208	10412080204	0	3	32	1	5	2	2															2												2	2	2
0	0	1041209	10412090208	0	3	35	1	8	1	2															2												2	2	2
0	0	1041209	10412090207	0	3	35	1	8	1	2															2												2	2	2
0	0	1041210	10412100203	0	1	40	1	4	0	2															1	0		A						A		2	2	2	2
0	0	1041210	10412100204	0	1	40	1	4	0	2															2												2	2	2
0	0	1041211	10412110206	0	3	40	1	7	1	2															2												2	2	2
0	0	1041211	10412110205	0	3	40	1	7	1	2															2												2	2	2
0	0	1041211	10412110204	0	3	40	1	7	1	2															2												2	2	2
0	0	1041212	10412120103	0	3	24	2	3	2	1	2		D				D						D	4	2												2	2	2
0	0	1041213	10412131303	0	3	30	1	3	1	1	2		C	D			H						H	0	2												2	2	2
0	0	1041214	10412140207	0	3	40	1	9	2	1	1		D				H						H	0	2												2	2	2
0	0	1041214	10412140209	0	3	40	1	9	2	1	2		D				H						H	0	2												2	2	2
0	0	1041214	10412140206	0	3	40	1	9	2	1	2		D				H						H	0	2												2	2	2
0	0	1041215	10412150103	0	2	36	1	4	1	1	2		B				B	G					B	2	2												2	2	2
0	0	1041215	10412150104	0	2	36	1	4	1	1	2		E				B	G					B	12	2												2	2	2
0	0	1041216	10412160108	0	3	37	1	8	1	1	2		D				G						G	6	1	98		G						G	6	1	1	2	2	0	3	C
0	0	1041216	10412160107	0	3	37	1	8	1	1	2		D				G						G	8	1	98		G						G	0	1	1	2	2	0	3	C
0	0	1041217	10412170103	0	3	35	1	4	1	2															2												2	2	2
0	0	1041217	10412170104	0	3	35	1	4	1	1	2		X				N						N	0	2												2	2	2
0	0	1041218	10412180207	0	2	50	1	7	3	1	1		G				C						C	3	2												2	2	2
0	0	1041218	10412180206	0	2	50	1	7	3	1	1		G				B						B		2												2	2	2
0	0	1041219	10412190203	0	3	32	1	4	3	2															2												2	2	2
0	0	1041219	10412190204	0	3	32	1	4	3	2															2												2	2	2
0	0	1041220	10412200203	0	3	26	1	4	2	1	1		D				J						J	7	1	2		I						I	2	2	2	2	2
0	0	1041221	10412210203	0	3	31	1	3	3	2															2												2	2	2
0	0	1041222	10412220204	0	3	65	1	5	2	1	1		X			HERBAL	H						H	0	2												2	2	2
0	0	1041222	10412220203	0	3	65	1	5	2	1	1		X			HERBAL	H						H	0	2												2	2	2
0	0	1041223	10412230211	0	3	41	1	12	1	1	1		F				H						H	3	2												2	2	2
0	0	1041223	10412230212	0	3	41	1	12	1	1	1		F				H						H	3	2												2	2	2
0	0	1041224	10412240210	0	3	45	1	10	2	2															2												2	2	2
0	0	1041225	10412250308	0	3	50	1	10	1	2															2												2	2	2
0	0	1041225	10412250309	0	3	50	1	10	1	2															2												2	2	2
0	0	1041225	10412250310	0	3	50	1	10	1	2															2												2	2	2
0	0	1041226	10412260203	0	3	29	1	3	2	1	1		C	D			H						H	0	1	14		H						H	0	1	1	2	2	0	3	C
0	0	1041301	10413010110	0	2	43	2	10	1	1	1		X			HERBS									2												2	2	2
0	0	1041302	10413020204	0	2	36	1	5	1	2															2												2	2	2
0	0	1041303	10413030210	0	2	43	1	10	1	2															1	7		B						B	2	1	1	2	2	2	7	B
0	0	1041304	10413040204	0	3	26	1	4	1	2															2												2	2	2
0	0	1041304	10413040203	0	3	26	1	4	1	2															2												2	2	2
0	0	1041305	10413050211	0	2	36	1	12	1	2															2												2	2	2
0	0	1041305	10413050210	0	2	36	1	12	1	2															2												2	2	2
0	0	1041306	10413060205	0	3	39	1	5	1	2															2												2	2	2
0	0	1041307	10413070408	0	3	44	1	8	2	2															2												2	2	2
0	0	1041308	10413080102	0	1	67	2	3	0	2															2												2	2	2
0	0	1041309	10413090305	0	1	73	1	5	0	1	1		Z				B						B	3	1	7		B						B	6	1	2	2	2
0	0	1041310	10413100205	0	2	60	1	6	1	2															2												2	2	2
0	0	1041310	10413100206	0	2	60	1	6	1	2															2												2	2	2
0	0	1041311	10413110206	0	2	32	1	7	1	1	2		X			LOCAL HERBS									2												2	2	2
0	0	1041311	10413110207	0	2	32	1	7	1	1	2		A												2												2	2	2
0	0	1041312	10413120204	0	3	45	1	4	2	8															2												2	2	2
0	0	1041312	10413120203	0	3	45	1	4	2	8															2												2	2	2
0	0	1041313	10413130309	0	1	50	2	9	0	1	2		D				G						G	7	1	1		A						A	1	1	2	2	2
0	0	1041314	10413140104	0	1	30	2	4	0	1	2		C	G			G						G	0	2												2	2	2
0	0	1041315	10413150209	0	2	54	1	10	1	1	2		A												2												2	2	2
0	0	1041315	10413150210	0	2	54	1	10	1	1	1		G												2												2	2	2
0	0	1041316	10413160204	0	2	30	1	4	1	1	2		X			LOCAL HERBS									2												2	2	2
0	0	1041317	10413170206	0	3	45	1	6	2	2															2												2	2	2
0	0	1041318	10413180205	0	2	28	1	5	1	2															2												2	2	2
0	0	1041318	10413180204	0	2	28	1	5	1	2															2												2	2	2
0	0	1041319	10413190203	0	3	26	1	3	2	1	2		B	C			H						H	1	2												2	2	2
0	0	1041320	10413200107	0	2	48	2	7	0	1	2		A												2												2	2	2
0	0	1041321	10413210209	0	2	40	1	9	1	1	2		D				C						C		2												2	2	2
0	0	1041321	10413210208	0	2	40	1	9	1	2															2												2	2	2
0	0	1041322	10413220207	0	3	50	2	7	2	2															2												2	2	2
0	0	1041323	10413230204	0	1	40	1	5	1	2															2												2	2	2
0	0	1041323	10413230205	0	1	40	1	5	1	2															2												2	2	2
0	0	1041324	10413240203	0	2	21	1	3	1	1	1		X			HERB	C						C	7	2												2	2	2
0	0	1041325	10413250204	0	3	54	1	4	2	2															1	3		H						H	1	1	1	2	2	1	3	C
0	0	1041326	10413260203	0	3	34	1	3	2	2															2												2	2	2
0	0	1102001	11020010203	0	1	38	1	3	1	1	2		G				A						A	0	1	5		A						A	3	1	1	2	2	3	7	X
0	0	1102002	11020020204	0	1	30	1	5	1	1	2		X			HERBAL									2												2	2	2
0	0	1102002	11020020205	0	1	30	1	5	1	1	2		X			HERBAL									2												2	2	2
0	0	1102003	11020030206	0	1	29	1	6	1	1	2		C												2												2	2	2
0	0	1102003	11020030205	0	1	29	1	6	1	1	2		C												1	5										2	2	2	2
0	0	1102004	11020040206	0	3	35	1	6	1	1	2		X			COTRIZ SYRUP	G						G	0	1	5		G						G	0	1	2	2	2
0	0	1102005	11020050204	0	1	61	1	6	1	2															2												2	2	2
0	0	1102005	11020050203	0	1	61	1	6	1	1	2		A												2												2	2	2
0	0	1102006	11020060205	0	1	26	1	7	1	2															2												2	2	2
0	0	1102006	11020060204	0	1	26	1	7	1	2															1	7		C							0	1	1	2	2	0	3	B
0	0	1102006	11020060203	0	1	26	1	7	1	2															1	7		C							0	1	1	2	2	0	3	B
0	0	1102007	11020070209	0	1	65	1	10	1	2															2												2	2	2
0	0	1102008	11020080203	0	1	66	1	6	1	1	2		D				G						G	3	2												2	2	2
0	0	1102008	11020080205	0	1	66	1	6	1	1	2		D				G						G	3	2												2	2	2
0	0	1102008	11020080204	0	1	66	1	6	1	1	2		D				G						G	3	2												2	2	2
0	0	1102009	11020090209	0	1	65	1	9	1	2															2												2	2	2
0	0	1102009	11020090208	0	1	65	1	9	1	2															1	6										2	2	2	2
0	0	1102009	11020090207	0	1	65	1	9	1	2															1	6										2	2	2	2
0	0	1102010	11020100205	0	1	63	1	5	1	1	1		G				H						H	2	1	7		H						H	4	2	2	2	2
0	0	1102010	11020100204	0	1	63	1	5	1	1	1		G				H						H	2	1	7		H						H	4		2	2	2
0	0	1102011	11020110208	0	2	37	1	8	1	2															2												2	2	2
0	0	1102011	11020110207	0	2	37	1	8	1	2															2												2	2	2
0	0	1102011	11020110206	0	2	37	1	8	1	2															2												2	2	2
0	0	1102012	11020120207	0	2	81	2	7	0	1	2		X			HERBAL									2												2	2	2
0	0	1102013	11020130204	0	2	56	1	4	1	1	1		G				C						C	3	2												2	2	2
0	0	1102014	11020140105	0	1	45	2	5	1	2															2												2	2	2
0	0	1102015	11020150207	0	1	35	1	7	1	1	2		X			FLUCAP	H						H	3	2												2	2	2
0	0	1102015	11020150206	0	1	35	1	7	1	1	2		X			FLUCAP	H						H	3	2												2	2	2
0	0	1102015	11020150205	0	1	35	1	7	1	2															2												2	2	2
0	0	1102016	11020160206	0	1	30	1	6	2	2															2												2	2	2
0	0	1102016	11020160205	0	1	30	1	6	2	2															2												2	2	2
0	0	1102017	11020170211	0	1	39	1	12	1	2															2												2	2	2
0	0	1102017	11020170212	0	1	39	1	12	1	2															2												2	2	2
0	0	1102018	11020180204	0	2	35	1	4	4	2															2												2	2	2
0	0	1102019	11020190203	0	3	20	1	3	2	2															2												2	2	2
0	0	1102020	11020200103	0	3	51	2	4	2	2															2												2	2	2
0	0	1102020	11020200102	0	3	51	2	4	2	2															2												2	2	2
0	0	1102020	11020200104	0	3	51	2	4	2	2															2												2	2	2
0	0	1102021	11020210203	0	1	30	1	4	1	2															2												2	2	2
0	0	1102021	11020210204	0	1	30	1	4	1	1	2		C	D			G						G		1	0		G						G	0	1	1	2	2	0	3	E
0	0	1102022	11020220203	0	2	26	1	3	2	2															2												2	2	2
0	0	1102023	11020230207	0	1	34	1	7	1	1	2		G	X		HERBAL	M						M	3	2												2	2	2
0	0	1102023	11020230205	0	1	34	1	7	1	1	2		G	X		HERBAL	M						M	3	2												2	2	2
0	0	1102023	11020230206	0	1	34	1	7	1	1	2		G	X		HERBAL	M						M	3	2												2	2	2
0	0	1102024	11020240204	0	2	23	1	6	1	2															2												2	2	2
0	0	1102024	11020240205	0	2	23	1	6	1	2															2												2	2	2
0	0	1102024	11020240206	0	2	23	1	6	1	2															2												2	2	2
0	0	1102025	11020250207	0	3	33	1	8	2	1	1		G				C						C	1	2												2	2	2
0	0	1102025	11020250208	0	3	33	1	8	2	1	1		G				C						C	1	2												2	2	2
0	0	1102025	11020250206	0	3	33	1	8	2	1	1		G				C						C	1	2												2	2	2
0	0	1102026	11020260210	0	1	42	1	10	1	1	2		G				G						G	0	1	4		G						G	0	1	1	2	2	0	3	C
0	0	1102101	11021010209	0	3	48	1	9	3	1	1						A						A	2	2												2	2	2
0	0	1102101	11021010208	0	3	48	1	9	3	1	2						A						A	7	2												2	2	2
0	0	1102102	11021020305	0	1	65	1	5	1	1	2		G				G						G	1	2												2	2	2
0	0	1102103	11021030206	0	2	35	1	7	2	1	2		D	G			G						G	4	2												2	2	2
0	0	1102103	11021030207	0	2	35	1	7	2	1	2		D	G			G						G	4	1	14		G						G	4	1	2	2	2
0	0	1102104	11021040207	0	1	38	1	7	1	1	2		G				G						G	4	2												2	2	2
0	0	1102105	11021050207	0	1	30	1	7	1	2															2												2	2	2
0	0	1102105	11021050206	0	1	30	1	7	1	2															2												2	2	2
0	0	1102106	11021060209	0	1	36	1	9	1	2															2												2	2	2
0	0	1102106	11021060208	0	1	36	1	9	1	1	2		X			HERBS									2												2	2	2
0	0	1102107	11021070205	0	2	35	1	6	2	2															2												2	2	2
0	0	1102107	11021070206	0	2	35	1	6	2	2															2												2	2	2
0	0	1102108	11021080209	0	3	40	1	9	1	1	2		G												2												2	2	2
0	0	1102108	11021080208	0	3	40	1	9	1	1	2		G												2												2	2	2
0	0	1102109	11021090208	0	1	38	1	9	1	2															2												2	2	2
0	0	1102109	11021090209	0	1	38	1	9	1	1	1		A												1	14		B						B	3	1	2	2	2
0	0	1102110	11021100205	0	1	30	1	5	1	1	2		A												2												2	2	2
0	0	1102111	11021110209	0	2	40	1	9	1	1	2		G												2												2	2	2
0	0	1102112	11021120207	0	1	28	1	8	0	1	1		G				C						C	2	1	14		C						C	2	1	1	2	2	2	5	B
0	0	1102113	11021130207	0	1	36	1	8	1	2															2												2	2	2
0	0	1102113	11021130208	0	1	36	1	8	1	2															2												2	2	2
0	0	1102114	11021140209	0	3	44	1	9	1	1	2														2												2	2	2
0	0	1102115	11021150203	0	2	30	1	3	4	1	2		C	D			B	L					L	1	2												2	2	2
0	0	1102116	11021160204	0	3	40	1	4	1	1	2		G	X		VITAMIN C									2												2	2	2
0	0	1102117	11021170207	0	2	36	1	7	1	2															2												2	2	2
0	0	1102118	11021180205	0	2	28	1	6	2	1	2		D	G			G						G		2												2	2	2
0	0	1102118	11021180206	0	2	28	1	6	2	2															2												2	2	2
0	0	1102118	11021180204	0	2	28	1	6	2	1	2		D	G			G						G		2												2	2	2
0	0	1102119	11021190206	0	2	43	1	6	2	2															2												2	2	2
0	0	1102119	11021190205	0	2	43	1	6	2	1	2		G	X		PILLITON	H						H	1	2												2	2	2
0	0	1102120	11021200210	0	3	45	1	10	1	2															2												2	2	2
0	0	1102121	11021210206	0	3	55	1	6	1	1	2		G				G						G	1	2												2	2	2
0	0	1102122	11021220205	0	3	57	1	5	1	1	2		C	G			B						B	4	2												2	2	2
0	0	1102123	11021230206	0	1	32	1	7	1	2															2												2	2	2
0	0	1102123	11021230207	0	1	32	1	7	1	2															2												2	2	2
0	0	1102124	11021240206	0	3	29	1	5	1	1	2		C	G	X	INJECTION	G						G	3	2												2	2	2
0	0	1102125	11021250204	0	3	26	1	4	2	2															1	14		G						G		1	1	2	2	0	7	C
0	0	1102126	11021260209	0	2	46	1	10	1	2															2												2	2	2
0	0	1102201	11022010206	0	2	40	1	6	1	1	2		Z				G						G	7	1	7		G						G	2		2	2	2
0	0	1102202	11022020204	0	2	35	1	5	1	2															2												2	2	2
0	0	1102202	11022020203	0	2	35	1	5	1	2															2												2	2	2
0	0	1102203	11022030204	0	1	67	1	6	1	1	2		A												2												2	2	2
0	0	1102203	11022030203	0	1	67	1	6	1	2															2												2	2	2
0	0	1102204	11022040203	0	1	25	1	3	0	1	1		D	E			G						G	0	2												2	2	2
0	0	1102205	11022050104	0	1	30	1	4	1	1	2		C	G	X	COLD CAP									2												2	2	2
0	0	1102205	11022050103	0	1	30	1	4	1	1	2		C	G	X	COLD CAP									2												2	2	2
0	0	1102206	11022060203	0	2	31	1	3	1	1	1		C	D	G		A						A	3	1	9		A						A	3	1	1	2	2	1	3	B
0	0	1102207	11022070205	0	1	28	1	5	1	2															1	7		B						B	2	1	2	2	2
0	0	1102207	11022070204	0	1	28	1	5	1	2															2												2	2	2
0	0	1102208	11022080206	0	2	32	1	8	0	2															2												2	2	2
0	0	1102208	11022080205	0	2	32	1	8	0	2															1	4		G						G	2	1	1	2	2	0	3	C
0	0	1102208	11022080207	0	2	32	1	8	0	2															2												2	2	2
0	0	1102209	11022090207	0	3	44	1	7	1	2															2												2	2	2
0	0	1102209	11022090206	0	3	44	1	7	1	2															2												2	2	2
0	0	1102210	11022100204	0	2	25	1	4	1	2															1	4		B	G					G	1	1	1	2	2	0	2	B
0	0	1102211	11022110106	0	1	33	2	6	0	2															2												2	2	2
0	0	1102212	11022120203	0	3	29	1	3	2	2															2												2	2	2
0	0	1102213	11022130109	0	3	40	2	10	1	1	2		G				G						G	2	2												2	2	2
0	0	1102214	11022140105	0	1	31	1	5	1	1	1		C	G			G						G	3	2												2	2	2
0	0	1102214	11022140104	0	1	31	1	5	1	1	2		C	G			G						G	3	2												2	2	2
0	0	1102215	11022150203	0	2	20	2	3	2	1	1		X			KABUUTI	G						G	1	2												2	2	2
0	0	1102216	11022160105	0	3	24	2	5	1	2															2												2	2	2
0	0	1102216	11022160103	0	3	24	2	5	1	2															2												2	2	2
0	0	1102216	11022160104	0	3	24	2	5	1	2															2												2	2	2
0	0	1102217	11022170207	0	1	47	1	7	1	2															1	98		G						G	0	1	2	2	2
0	0	1102217	11022170205	0	1	47	1	7	1	2															1	98		G						G	0	1	2	2	2
0	0	1102218	11022180203	0	1	22	1	3	2	1	1		X			HERBAL	N						N	2	1	1		N						N	0	2	2	2	2
0	0	1102219	11022190204	0	2	35	1	5	1	2															2												2	2	2
0	0	1102219	11022190205	0	2	35	1	5	1	2															2												2	2	2
0	0	1102220	11022200103	0	1	33	2	3	1	1	1		G				D						D	0	2												2	2	2
0	0	1102221	11022210204	0	1	28	1	4	1	1	1		X			KWESIIMA	H						H	7	1	7		G						G	1	1	2	2	2
0	0	1102221	11022210203	0	1	28	1	4	1	1	1		X			KWESIIMA	H						H	3	1	5		G						G	0	1	2	2	2
0	0	1102222	11022220203	0	1	36	1	6	1	1	2		A												2												2	2	2
0	0	1102222	11022220204	0	1	36	1	6	1	1	2		A												2												2	2	2
0	0	1102223	11022230204	0	2	27	1	4	1	1	1		X			KWESIIMA HERBAL SYRUP	H						H	4	2												2	2	2
0	0	1102223	11022230203	0	2	27	1	4	1	1	2		C	D	G		H						H	2	1	4		H						H	4	1	2	2	2
0	0	1102224	11022240203	0	1	24	1	3	1	1	1		G				H						H	2	1	14		C						C	0	1	2	2	2
0	0	1102225	11022250203	0	1	35	1	6	1	1	1		C	D			H						H	0	2												2	2	2
0	0	1102225	11022250204	0	1	35	1	6	1	1	1		C	D			H						H	4	1	5		C						C	2	1	1	2	2	2	3	B
0	0	1102226	11022260204	0	2	40	1	8	4	1	2		D	X		FLUFED	H						H	2	1	4		H						H	0	1	1	2	2	0	3	B
0	0	1102226	11022260203	0	2	40	1	8	4	1	2		D	X		FLUFED	H						H	1	1	3		H						H	0	1	2	2	2
0	0	1102301	11023010210	0	3	55	1	10	1	1	2		X			PIRITEX	J						J	1	2												2	2	2
0	0	1102301	11023010209	0	3	55	1	10	1	2															2												2	2	2
0	0	1102302	11023020207	0	3	37	1	7	1	1	1		G												2												2	2	2
0	0	1102303	11023030211	0	3	47	1	11	2	2															2												2	2	2
0	0	1102303	11023030209	0	3	47	1	11	2	2															2												2	2	2
0	0	1102303	11023030210	0	3	47	1	11	2	2															2												2	2	2
0	0	1102304	11023040203	0	3	26	1	4	2	2															2												2	2	2
0	0	1102304	11023040204	0	3	26	1	4	2	2															2												2	2	2
0	0	1102305	11023050204	0	3	33	1	4	1	1	2		G				J						J	4	1	14		G						G	7	2	2	2	2
0	0	1102306	11023060209	0	3	38	1	9	1	1	1		G				G						G	4	2												2	2	2
0	0	1102307	11023070207	0	3	38	1	8	1	2															2												2	2	2
0	0	1102307	11023070208	0	3	38	1	8	1	1	2		G												1	10										1	2	2	2
0	0	1102308	11023080203	0	3	26	1	3	2	2															2												2	2	2
0	0	1102309	11023090203	0	3	23	1	4	1	2															2												2	2	2
0	0	1102309	11023090204	0	3	23	1	4	1	1	2		A												2												2	2	2
0	0	1102310	11023100102	0	2	26	2	3	2	1	1		D				C	G					G	2	2												2	2	2
0	0	1102310	11023100103	0	2	26	2	3	2	1	1		D				C	G					G	2	1	7		C						C	7	1	2	2	2
0	0	1102311	11023110203	0	3	21	1	3	2	2															2												2	2	2
0	0	1102312	11023120203	0	3	21	1	3	1	1	2		C	X		VITAMIN C	G						G	7	2												2	2	2
0	0	1102313	11023130204	0	2	31	1	4	2	1	1		G				C						C	4	2												2	2	2
0	0	1102314	11023140205	0	2	37	1	5	1	2															1	7		C						C	2	1	1	2	2	0	4	B
0	0	1102314	11023140204	0	2	37	1	5	1	2															2												2	2	2
0	0	1102315	11023150208	0	2	38	1	10	1	2															2												2	2	2
0	0	1102315	11023150209	0	2	38	1	10	1	2															2												2	2	2
0	0	1102316	11023160206	0	3	28	1	6	1	2															2												2	2	2
0	0	1102316	11023160205	0	3	28	1	6	1	2															2												2	2	2
0	0	1102317	11023170205	0	2	34	1	5	1	2															2												2	2	2
0	0	1102318	11023180204	0	2	29	1	5	1	1	2		D	G			H						H	3	1	0		H						H	0	1	1	2	2	0	1	C
0	0	1102318	11023180205	0	2	29	1	5	1	1	2		D	G			H						H	3	2												2	2	2
0	0	1102319	11023190207	0	2	40	1	8	1	2															2												2	2	2
0	0	1102319	11023190208	0	2	40	1	8	1	2															2												2	2	2
0	0	1102320	11023200205	0	3	43	1	5	2	1	2		G	X		VITAMIN C	H						H	5	1	14		H						H	5	1	2	2	2
0	0	1102321	11023210206	0	2	30	1	6	1	1	2		A												2												2	2	2
0	0	1102321	11023210205	0	2	30	1	6	1	1	1		A												2												2	2	2
0	0	1102322	11023220207	0	2	41	1	8	1	1	2		C				H						H	2	2												2	2	2
0	0	1102322	11023220208	0	2	41	1	8	1	1	2		C				H						H	2	2												2	2	2
0	0	1102323	11023230205	0	1	38	1	6	1	1	2		D	G			H						H	3	1	5		H						H	3	1	1	2	2	3	5	C
0	0	1102323	11023230206	0	1	38	1	6	1	1	2		D	G			H						H	3	1	5		H						H	3	1	1	2	2	3	5	C
0	0	1102324	11023240207	0	3	59	2	7	1	1	2		D	X		VITAMIN C	H						H	1	2												2	2	2
0	0	1102324	11023240206	0	3	59	2	7	1	1	2		D	X		VICTAMIN C	H						H	1	2												2	2	2
0	0	1102325	11023250207	0	3	27	1	8	1	2															2												2	2	2
0	0	1102325	11023250208	0	3	27	1	8	1	2															1	4		H						H	0	1	1	2	2	0	3	C
0	0	1102326	11023261008	0	1	63	1	10	1	2															2												2	2	2
0	0	1102326	11023261009	0	1	63	1	10	1	2															2												2	2	2
0	0	1102326	11023261007	0	1	63	1	10	1	2															2												2	2	2
0	0	1102401	11024010204	0	3	36	1	4	4	2															2												2	2	2
0	0	1102401	11024010203	0	3	36	1	4	4	1	1		D	X		AMNOFRIN INJECTION	A						A	0	1	7		A						A	0	1	2	2	2
0	0	1102402	11024020205	0	3	48	1	5	4	2															1	7		A						A	0	1	2	2	2
0	0	1102403	11024030204	0	3	58	2	4	1	2															2												2	2	2
0	0	1102404	11024040205	0	3	35	1	5	2	1	2		X			SEPTRIN SYRUP									2												2	2	2
0	0	1102405	11024050205	0	3	45	1	5	2	1	1		G	X		VITAMIN C									2												2	2	2
0	0	1102406	11024060208	0	3	49	1	8	3	2															2												2	2	2
0	0	1102407	11024070204	0	1	50	2	4	0	2															2												2	2	2
0	0	1102408	11024080207	0	1	30	1	7	1	2															2												2	2	2
0	0	1102408	11024080206	0	1	30	1	7	1	2															2												2	2	2
0	0	1102409	11024090204	0	3	37	1	5	4	2															2												2	2	2
0	0	1102409	11024090205	0	3	37	1	5	4	2															2												2	2	2
0	0	1102409	11024090203	0	3	37	1	5	4	2															2												2	2	2
0	0	1102411	11024110203	0	3	41	1	9	2	2															2												2	2	2
0	0	1102412	11024120203	0	3	52	1	5	4	2															2												2	2	2
0	0	1102412	11024120204	0	3	52	1	5	4	2															2												2	2	2
0	0	1102413	11024130102	0	3	46	2	3	1	2															2												2	2	2
0	0	1102413	11024130103	0	3	46	2	3	1	2															2												2	2	2
0	0	1102414	11024140204	0	2	45	1	6	4	2															2												2	2	2
0	0	1102414	11024140203	0	2	45	1	6	4	1	1		D				B						B	2	2												2	2	2
0	0	1102416	11024160203	0	2	22	1	5	1	2															2												2	2	2
0	0	1102416	11024160204	0	2	22	1	5	1	2															2												2	2	2
0	0	1102417	11024170203	0	3	27	1	3	1	2															2												2	2	2
0	0	1102418	11024180203	0	3	47	1	3	1	2															2												2	2	2
0	0	1102419	11024190204	0	1	27	1	10	1	2															2												2	2	2
0	0	1102419	11024190310	0	1	27	1	10	1	2															2												2	2	2
0	0	1102419	11024190206	0	1	27	1	10	1	2															2												2	2	2
0	0	1102419	11024190205	0	1	27	1	10	1	2															2												2	2	2
0	0	1102420	11024200207	0	2	38	1	7	1	2															2												2	2	2
0	0	1102421	11024210208	0	2	46	1	9	4	1	1		X			PRIDINSOLIN	H						H	0	2												2	2	2
0	0	1102422	11024220207	0	2	36	1	7	1	1	2		X			HERBAL									2												2	2	2
0	0	1102422	11024220206	0	2	36	1	7	1	1	2		X			HERBAL									2												2	2	2
0	0	1102423	11024230208	0	3	31	1	9	2	1	2		G				B						B	2	2												2	2	2
0	0	1102423	11024230207	0	3	31	1	9	2	1	2		G				B						B	2	2												2	2	2
0	0	1102423	11024230209	0	3	31	1	9	2	1	2		G				B						B	2	2												2	2	2
0	0	1102424	11024240207	0	1	38	1	9	1	1	2		G				B						B	2	2												2	2	2
0	0	1102424	11024240209	0	1	38	1	9	1	1	2		G				B						B	2	1	7		J						J	3	1	2	2	2
0	0	1102424	11024240208	0	1	38	1	9	1	1	2		G				B						B	2	1	7		B	J					J	3	1	2	2	2
0	0	1102425	11024250305	0	2	34	1	6	4	2															2												2	2	2
0	0	1102425	11024250306	0	2	34	1	6	4	2															2												2	2	2
0	0	1102426	11024260206	0	2	76	1	6	1	2															2												2	2	2
0	0	1102501	11025010204	0	2	30	1	4	1	2															2												2	2	2
0	0	1102502	11025020205	0	1	40	1	5	0	1	1		X			HERBAL									1	3		G						G	3	1	1	2	2	2	3	C
0	0	1102503	11025030204	0	1	27	2	4	1	2															1	7		G						G	3	1	2	2	2
0	0	1102505	11025050207	0	1	50	1	7	0	1	2		D	G			B						B	5	2												2	2	2
0	0	1102506	11025060205	0	2	30	1	5	1	1	1		D				G						G	0	1	7		G						G	0	1	1	2	2	0	3	C
0	0	1102506	11025060204	0	2	30	1	5	1	2															2												2	2	2
0	0	1102507	11025070204	0	1	25	1	4	1	1	2		D				G						G	2	1	14		G						G	2	1	2	2	2
0	0	1102507	11025070203	0	1	25	1	4	1	2															2												2	2	2
0	0	1102508	11025080206	0	1	33	1	6	1	1	2		D				G						G	0	1	7		G						G	0	1	2	2	2
0	0	1102508	11025080203	0	1	33	1	6	1	1	2		D				G						G	0	1	7		G						G	0	1	2	2	2
0	0	1102509	11025090102	0	1	49	2	6	0	1	1		C	X		X-PEN	B						B	2	1	8		B						B	0	1	2	2	2
0	0	1102509	11025090203	0	1	49	2	6	0	1	1		C	G			G						G	7	1	7		G						G	2	1	1	2	2	0	4	C
0	0	1102510	11025100205	0	1	37	1	6	2	2															1	14		C						C	3	1	2	2	2
0	0	1102510	11025100204	0	1	37	1	6	2	1	2		Z				C						C	5	2												2	2	2
0	0	1102510	11025100203	0	1	37	1	6	2	1	2		Z				C						C	5	2												2	2	2
0	0	1102511	11025110203	0	1	27	1	4	1	1	2		X			FLUCAP	H						H	0	2												2	2	2
0	0	1102511	11025110204	0	1	27	1	4	1	1	2		X			FLUCAP	H						H	2	2												2	2	2
0	0	1102512	11025120205	0	2	45	1	9	1	2															2												2	2	2
0	0	1102512	11025120703	0	2	45	1	9	1	1	1		E				C						C	1	2												2	2	2
0	0	1102512	11025120204	0	2	45	1	9	1	2															2												2	2	2
0	0	1102513	11025130803	0	2	36	1	8	2	2															2												2	2	2
0	0	1102513	11025130804	0	2	36	1	8	2	2															2												2	2	2
0	0	1102513	11025130805	0	2	36	1	8	2	2															2												2	2	2
0	0	1102514	11025140203	0	1	26	1	3	1	1	1		C	G			H						H	2	2												2	2	2
0	0	1102515	11025150204	0	1	23	1	4	1	2															2												2	2	2
0	0	1102515	11025150203	0	1	23	1	4	1	2															2												2	2	2
0	0	1102516	11025160203	0	1	25	1	4	1	1	1		G	X		KABUTI	H						H	4	2												2	2	2
0	0	1102517	11025170203	0	2	60	1	5	1	1	2		C	G			H						H	0	1	10		H						H	0	1	1	2	2	0	3	C
0	0	1102518	11025180203	0	1	37	1	6	1	2															2												2	2	2
0	0	1102518	11025180205	0	1	37	1	6	1	1	1		C	G			H						H	2	1	4		H						H	0	1	2	2	2
0	0	1102518	11025180206	0	1	37	1	6	1	1	1		C	G			H						H	2	2												2	2	2
0	0	1102519	11025190207	0	1	40	1	7	1	1	1		G	X		FLUCAP	G						G	1	1	5		G						G	1	1	2	2	2
0	0	1102520	11025200203	0	2	28	1	5	2	1	2		D				G						G	3	2												2	2	2
0	0	1102520	11025200204	0	2	28	1	5	2	2															2												2	2	2
0	0	1102521	11025210104	0	1	45	2	8	0	2															2												2	2	2
0	0	1102521	11025210103	0	1	45	2	8	0	1	1		G				G						G	0	2												2	2	2
0	0	1102522	11025220205	0	2	44	1	5	1	1	1		G				G						G	3	2												2	2	2
0	0	1102523	11025230206	0	2	40	1	8	1	2															1	7										2	2	2	2
0	0	1102523	11025230207	0	2	40	1	8	1	1	1		G				C						C	7	1	14		C						C	7	1	2	2	2
0	0	1102523	11025230208	0	2	40	1	8	1	2															1	7										2	2	2	2
0	0	1102524	11025240207	0	2	35	1	9	1	1	2		X			HERBAL									2												2	2	2
0	0	1102524	11025240209	0	2	35	1	9	1	1	2		X			HERBAL									2												2	2	2
0	0	1102524	11025240208	0	2	35	1	9	1	1	2		X			HERBAL									2												2	2	2
0	0	1102525	11025250203	0	1	70	1	3	1	1	1		C	G			G						G	1	1	7		C	G					C	3	1	2	2	2
0	0	1102526	11025260204	0	1	32	1	4	1	1	2		C	G			G						G	1	2												2	2	2
0	0	1102601	11026010207	0	2	50	1	11	1	1	2		X			FLUCAP	H						H	2	2												2	2	2
0	0	1102601	11026010206	0	2	50	1	11	1	1	2		X			FLUCAP	H						H	0	2												2	2	2
0	0	1102601	11026010203	0	2	50	1	11	1	1	2		X			FLUCAP	H						H	1	2												2	2	2
0	0	1102602	11026020206	0	1	35	1	6	1	2															2												2	2	2
0	0	1102602	11026020205	0	1	35	1	6	1	1	2		C	G			C						C	3	2												2	2	2
0	0	1102603	11026030204	0	3	60	1	5	2	1	1		D				H						H	0	2												2	2	2
0	0	1102603	11026030203	0	3	60	1	5	2	1	1		D				H						H	0	1	14		B						B	0	1	1	2	2	0	4	B
0	0	1102604	11026040206	0	3	35	1	7	1	1	2		C	G			G						G	4	2												2	2	2
0	0	1102604	11026040207	0	3	35	1	7	1	1	2		C	G			G						G	7	2												2	2	2
0	0	1102605	11026050209	0	2	35	1	9	1	2															1	3		G						G	1	1	1	2	2	1	2	C
0	0	1102606	11026060209	0	2	47	1	9	1	1	2		C	G			G						G	2	1	4		G						G	3	1	1	2	2	2	3	C
0	0	1102606	11026060207	0	2	47	1	9	1	1	2		C	G			G						G	2	1	4		G						G	2	1	1	2	2	2	3	C
0	0	1102607	11026070203	0	3	40	1	3	1	1	1		C	G			G						G	1	1	8		G						G	1	1	2	2	2
0	0	1102608	11026080204	0	3	38	1	4	1	1	2		C	G			G						G	1	2												2	2	2
0	0	1102609	11026090206	0	3	30	1	7	2	1	1		X			PRUCAP	G						G	2	1	7		G						G	2	1	1	2	2	2	2	C
0	0	1102609	11026090207	0	3	30	1	7	2	2															1	7		G						G	2	1	1	2	2	2	2	C
0	0	1102610	11026100205	0	3	28	1	5	2	2															2												2	2	2
0	0	1102610	11026100204	0	3	28	1	5	2	2															2												2	2	2
0	0	1102611	11026110104	0	1	22	2	5	2	1	1		G				B						B	2	2												2	2	2
0	0	1102611	11026110105	0	1	22	2	5	2	1	2		G	X		FLUCUP	B						B	0	2												2	2	2
0	0	1102612	11026120308	0	3	70	1	10	1	2															2												2	2	2
0	0	1102612	11026120307	0	3	70	1	10	1	2															2												2	2	2
0	0	1102613	11026130104	0	2	21	2	4	1	2															2												2	2	2
0	0	1102613	11026130103	0	2	21	2	4	1	2															2												2	2	2
0	0	1102614	11026140307	0	2	45	2	7	0	1	1		D				G						G	0	2												2	2	2
0	0	1102615	11026150107	0	3	31	2	7	2	2															2												2	2	2
0	0	1102616	11026160103	0	3	24	2	3	1	2															1	4		G						G	0	1	2	2	2
0	0	1102617	11026170103	0	3	23	2	3	2	1	2		D				C						C	0	2												2	2	2
0	0	1102618	11026180204	0	3	30	1	5	2	1	2		D	X		VITAMIN C	H						H	3	2												2	2	2
0	0	1102618	11026180203	0	3	30	1	5	2	1	2		D	X		VITAMIN C	H						H	2	2												2	2	2
0	0	1102619	11026190203	0	3	57	1	13	2	2															2												2	2	2
0	0	1102619	11026190204	0	3	57	1	13	2	2															2												2	2	2
0	0	1102620	11026200204	0	3	32	1	8	1	1	2		D	X		PIRITEX	H						H	1	1	10		G						G	0	1	2	2	2
0	0	1102620	11026200203	0	3	32	1	8	1	1	2		D	X		PIRITEX	H						H	2	1	14		G						G	1	1	2	2	2
0	0	1102621	11026210204	0	3	54	1	10	0	2															1	13		B						B	1	1	1	2	2	1	3	B
0	0	1102622	11026220203	0	2	38	1	8	1	1	2		D	X		PIRITEX	H						H	2	2												2	2	2
0	0	1102622	11026220204	0	2	38	1	8	1	2															2												2	2	2
0	0	1102623	11026230603	0	3	82	2	8	4	1	2		C	G			G						G	1	2												2	2	2
0	0	1102623	11026230602	0	3	82	2	8	4	1	2		C	G			G						G	1	2												2	2	2
0	0	1102624	11026240203	0	3	38	1	5	1	2															2												2	2	2
0	0	1102624	11026240204	0	3	38	1	5	1	1	2		C	D	G		G						G	3	2												2	2	2
0	0	1102624	11026240205	0	3	38	1	5	1	1	2		C	D	G		G						G	3	2												2	2	2
0	0	1102625	11026250102	0	2	25	2	6	2	1	2		C	G			H						H	1	1	13		G						G	0	1	2	2	2
0	0	1102625	11026250103	0	2	25	2	6	2	1	2		C	G			H						H	2	2												2	2	2
0	0	1102626	11026260102	0	3	50	2	3	2	1	2		G	X		PIRITON	H						H	3	1	7									0	2	2	2	2
0	0	1102626	11026260103	0	3	50	2	3	2	1	2		G	X		PIRITON	H						H	4	2												2	2	2
0	0	1102701	11027010207	0	2	40	2	7	1	1	2		C	G			C						C	3	1	7		C						C	1	1	1	2	2	1	3	B
0	0	1102701	11027010106	0	2	40	2	7	1	1	2		G				C						C	3	2												2	2	2
0	0	1102702	11027020203	0	1	26	1	4	1	2															1	14		C						C	2	1	1	2	2	2	3	B
0	0	1102703	11027030102	0	1	26	2	3	0	1	2		G				C						C	3	2												2	2	2
0	0	1102703	11027030103	0	1	26	2	3	0	1	2		C	G			C						C	3	2												2	2	2
0	0	1102704	11027040207	0	1	27	1	8	0	1	2		D				G						G	2	2												2	2	2
0	0	1102704	11027040208	0	1	27	1	8	0	1	2		G				G						G	2	2												2	2	2
0	0	1102705	11027050206	0	1	47	1	6	1	2															2												2	2	2
0	0	1102706	11027060206	0	1	33	1	8	1	1	2		D	G			C						C	1	2												2	2	2
0	0	1102706	11027060208	0	1	33	1	8	1	1	2		D	G			C						C	1	2												2	2	2
0	0	1102706	11027060207	0	1	33	1	8	1	1	1		D	G			C						C	1	2												2	2	2
0	0	1102707	11027070507	0	1	83	2	7	1	1	2		D				G						G	4	2												2	2	2
0	0	1102707	11027070506	0	1	83	2	7	1	1	2		D				G						G	4	2												2	2	2
0	0	1102707	11027070503	0	1	83	2	7	1	2															2												2	2	2
0	0	1102708	11027080204	0	1	28	1	4	0	1	1		X			INJECTION	B						B	3	1	7		B						B	2	1	1	2	2	3	6	B
0	0	1102708	11027080203	0	1	28	1	4	0	1	2		G				B						B	4	2												2	2	2
0	0	1102709	11027090207	0	1	44	1	7	0	1	2		G				C						C	2	1	7		C						C	3	1	1	2	2	3	4	B
0	0	1102709	11027090206	0	1	44	1	7	0	1	2		G				C						C	1	1	8		C						C	4	1	1	2	2	4	4	B
0	0	1102710	11027100208	0	1	50	1	8	0	2															2												2	2	2
0	0	1102710	11027100206	0	1	50	1	8	0	2															2												2	2	2
0	0	1102710	11027100207	0	1	50	1	8	0	2															2												2	2	2
0	0	1102711	11027110207	0	1	35	1	7	0	1	1		C				C						C	0	2												2	2	2
0	0	1102712	11027120205	0	1	58	1	5	1	2															1	14		C							0	1	2	2	2
0	0	1102713	11027130209	0	1	42	1	9	1	1	1		G				C						C	4	2												2	2	2
0	0	1102713	11027130207	0	1	42	1	9	1	1	1		G				C						C	4	2												2	2	2
0	0	1102713	11027130208	0	1	42	1	9	1	1	1		G				C						C	4	2												2	2	2
0	0	1102714	11027140205	0	1	32	1	6	1	2															2												2	2	2
0	0	1102714	11027140206	0	1	32	1	6	1	2															2												2	2	2
0	0	1102715	11027150206	0	1	43	1	6	1	1	1		C	G			C						C	0	2												2	2	2
0	0	1102715	11027150205	0	1	43	1	6	1	2															1	14		C						C	1	1	2	2	2
0	0	1102716	11027160205	0	1	23	1	5	1	1	1		C	G			C	N					N	7	2												2	2	2
0	0	1102717	11027170207	0	3	55	1	7	1	2															2												2	2	2
0	0	1102718	11027180209	0	1	49	1	10	1	2															2												2	2	2
0	0	1102719	11027190207	0	1	36	1	8	0	1	2		G				C						C	2	1	7		C						C	2	1	1	2	2	3		B
0	0	1102719	11027190206	0	1	36	1	8	0	1	2		G				C						C	2	2												2	2	2
0	0	1102719	11027190208	0	1	36	1	8	0	1	2		G				C						C	2	1	7		C						C	2	1	1	2	2	3		B
0	0	1102720	11027200206	0	2	49	1	6	1	2															2												2	2	2
0	0	1102721	11027210206	0	1	42	1	7	1	2															1	14		C						C	1	1	1	2	2	3	3	B
0	0	1102722	11027220206	0	1	37	1	6		1	2		C	X		PILTON	H						H	2	2												2	2	2
0	0	1102723	11027230209	0	2	50	1	11	1	1	2		G												2												2	2	2
0	0	1102723	11027230208	0	2	50	1	11	1	1	2		G												2												2	2	2
0	0	1102723	11027230207	0	2	50	1	11	1	1	2		D	G			H						H	3	2												2	2	2
0	0	1102724	11027240207	0	1	60	1	9	0	1	2		A												2												2	2	2
0	0	1102724	11027240208	0	1	60	1	9	0	2															2												2	2	2
0	0	1102724	11027240209	0	1	60	1	9	0	1	2		A												2												2	2	2
0	0	1102725	11027250204	0	1	31	1	4	0	1	2		X			PEN V	H						H	2	2												2	2	2
0	0	1102726	11027260206	0	1	32	1	8	1	2															2												2	2	2
0	0	1102726	11027260207	0	1	32	1	8	1	2															2												2	2	2
0	0	1102726	11027260208	0	1	32	1	8	1	1	2		D												2												2	2	2
0	0	1102801	11028010204	0	3	32	1	4	4	2															2												2	2	2
0	0	1102802	11028020209	0	3	40	1	9	1	2															2												2	2	2
0	0	1102803	11028030204	0	3	31	1	5	4	2															1	2		B						B	1	2	2	2	2
0	0	1102803	11028030205	0	3	31	1	5	4	2															1	4		B						B	1	2	2	2	2
0	0	1102804	11028040102	0	2			1	1	1	1		G				G						G	2	1	14		B	G					G	2	1	1	2	2	0	7	C
0	0	1102805	11028050206	0	3	36	1	6	2	1	2		G				B						B	2	2												2	2	2
0	0	1102805	11028050205	0	3	36	1	6	2	1	2		G				B						B	2	2												2	2	2
0	0	1102806	11028060203	0	2	40	1	5	1	1	2		C	G			B						B	2	1	9		B						B	1	1	1	2	2	0	4	B
0	0	1102807	11028070207	0	2			8	1	1	1		G				B						B	2	2												2	2	2
0	0	1102807	11028070208	0	2			8	1	1	1		G				B						B	2	2												2	2	2
0	0	1102808	11028080102	0	2	32	2	5	1	2															2												2	2	2
0	0	1102809	11028090203	0	3	29	1	4	1	1	2		C	G			G						G	7	2												2	2	2
0	0	1102809	11028090204	0	3	29	1	4	1	1	2		C	G			G						G	7	2												2	2	2
0	0	1102810	11028100103	0	2	23	2	5	1	1	2		X			KWESIIMA	G						G	3	2												2	2	2
0	0	1102810	11028100104	0	2	23	2	5	1	1	2		X			KWASIIMA	G						G	3	2												2	2	2
0	0	1102810	11028100105	0	2	23	2	5	1	1	1		X			KWESIIMA	G						G	2	1	7										2	2	2	2
0	0	1102811	11028110103	0	3	31	2	5	4	2															2												2	2	2
0	0	1102811	11028110104	0	3	31	2	5	4	2															2												2	2	2
0	0	1102812	11028120206	0	1	25	1	6	1	2															2												2	2	2
0	0	1102813	11028130103	0	1	31	2	9	1	2															2												2	2	2
0	0	1102813	11028130104	0	1	31	2	9	1	2															2												2	2	2
0	0	1102814	11028140203	0	1	41	1	8	0	1	1		X			INJECTION	B						B	3	1	7		B						B	3	1	1	2	2	3	4	B
0	0	1102815	11028150206	0	1	78	2	6	0	2															2												2	2	2
0	0	1102816	11028160306	0	1	52	1	7	1	2															2												2	2	2
0	0	1102816	11028160307	0	1	52	1	7	1	2															1	7		G						G	0	1	1	2	2	0	2	A
0	0	1102817	11028170106	0	1	55	2	6	1	2															2												2	2	2
0	0	1102818	11028180102	0	3	39	1	3	1	1	2		E				B						B	1	1	14		B						B	0	1	2	2	2
0	0	1102819	11028190403	0	1	75	1	5	1	2															1	98		B						B	3	1	2	2	2
0	0	1102820	11028200204	0	2	35	1	6	2	2															1	10		B						B	0	1	1	2	2	0	3	B
0	0	1102820	11028200203	0	2	35	1	6	2	2															1	14		B						B	0	1	1	2	2	0	3	B
0	0	1102821	11028210203	0	1	37	1	4	1	1	1		G	X		FLUFED	B	H					B	2	1	7		B	H					B	0	1	2	2	2
0	0	1102822	11028220204	0	2	51	1	10	1	2															2												2	2	2
0	0	1102822	11028220210	0	2	51	1	10	1	1	1		G	X		HERBAL	B	H					B	10	1	14		B	H					B	0	1	2	2	2
0	0	1102823	11028230302	0	3	72	2	4		1	2		D				H						H	2	2												2	2	2
0	0	1102824	11028240203	0	2	29	1	4	1	2															2												2	2	2
0	0	1102825	11028250203	0	1	42	1	7		2															1	7		B						B	2	1	1	2	2	0	3	B
0	0	1102826	11028260203	0	3	26	1	3	1	1	1		C	G			B						B	3	1	3		B						B	0	1	1	2	2	0	3	B
0	0	1102901	11029010204	0	3	35	1	6	2	2															1	14		C						C	1	1	1	2	2	1	4	B
0	0	1102902	11029020205	0	3	32	1	5	2	1	2		G				C						C	1	1	7		C						C	1	1	1	2	2	1	3	B
0	0	1102903	11029030208	0	1	44	1	9	1	2															2												2	2	2
0	0	1102903	11029030309	0	1	44	1	9	1	1	1		C	G	X	AMPICILLIN	C						C	3	2												2	2	2
0	0	1102904	11029040205	0	1	60	1	7	1	2															2												2	2	2
0	0	1102904	11029040207	0	1	60	1	7	1	2															2												2	2	2
0	0	1102904	11029040206	0	1	60	1	7	1	2															2												2	2	2
0	0	1102905	11029050204	0	2	75	2	7	0	1	2		X			HERBS									2												2	2	2
0	0	1102906	11029060203	0	1	56	1	4	1	2															1	7		C						C	1	1	1	2	2	1	4	B
0	0	1102907	11029070208	0	2	38	1	8	1	2															2												2	2	2
0	0	1102908	11029080207	0	2	36	1	8	1	2															2												2	2	2
0	0	1102908	11029080208	0	2	36	1	8	1	2															1	3										1	1	2	2	3	2	A
0	0	1102909	11029090203	0	2	70	1	4	2	2															2												2	2	2
0	0	1102909	11029090204	0	2	70	1	4	2	2															2												2	2	2
0	0	1102910	11029100207	0	2	39	1	7	1	2															2												2	2	2
0	0	1102911	11029110102	0	1	31	2	3	1	2															2												2	2	2
0	0	1102911	11029110103	0	1	31	2	3	1	1	1		C				C						C	2	2												2	2	2
0	0	1102912	11029120204	0	1	46	1	4	1	2															2												2	2	2
0	0	1102913	11029130205	0	2	47	1	5	1	2															1	2		C						C	2	1	1	2	2	0	5	B
0	0	1102914	11029140105	0	2	42	1	6	1	2															2												2	2	2
0	0	1102914	11029140106	0	2	42	1	6	1	2															1	7		G						G	1	1	2	2	2
0	0	1102915	11029150104	0	1	44	2	4	0	1	2		C	G			C						C	2	2												2	2	2
0	0	1102916	11029160206	0	2	32	1	6	2	2															2												2	2	2
0	0	1102917	11029170405	0	1	88	1	5	0	2															2												2	2	2
0	0	1102918	11029180105	0	1	56	2	5	1	1	1		G				C						C	1	2												2	2	2
0	0	1102919	11029190207	0	3	38	1	7	2	2															2												2	2	2
0	0	1102920	11029200204	0	1	26	1	4	0	2															2												2	2	2
0	0	1102920	11029200203	0	1	26	1	4	0	2															2												2	2	2
0	0	1102921	11029210205	0	1	38	1	5	1	1	2		X			VITAMIN C	B						B	3	2												2	2	2
0	0	1102921	11029210304	0	1	38	1	5	1	2															2												2	2	2
0	0	1102922	11029220209	0	3	38	1	9	1	2															2												2	2	2
0	0	1102923	11029230206	0	1	30	1	7	1	2															2												2	2	2
0	0	1102923	11029230207	0	1	30	1	7	1	2															2												2	2	2
0	0	1102924	11029240205	0	1	30	1	5	1	2															2												2	2	2
0	0	1102924	11029240203	0	1	30	1	5	1	2															2												2	2	2
0	0	1102924	11029240204	0	1	30	1	5	1	2															2												2	2	2
0	0	1102925	11029250210	0	3	40	1	11	1	1	2		A												1	7		H						H	0	1	1	2	2	0	3	A
0	0	1102925	11029250211	0	3	40	1	11	1	1	2		A												2												2	2	2
0	0	1102925	11029250209	0	3	40	1	11	1	1	2		A												2												2	2	2
0	0	1102926	11029260208	0	2	46	1	8	1	1	1		D	G			B						B	0	2												2	2	2
0	0	1103001	11030010209	0	2	49	1	10	1	1	2		G				G						G	2	2												2	2	2
0	0	1103001	11030010210	0	2	49	1	10	1	2															2												2	2	2
0	0	1103002	11030020206	0	2	36	1	6	1	1	2		G				G						G	3	2												2	2	2
0	0	1103003	11030030204	0	1	22	1	4	1	1	2		C	G			G						G	2	2												2	2	2
0	0	1103003	11030030203	0	1	22	1	4	1	2															2												2	2	2
0	0	1103004	11030040106	0	1	46	2	6	0	1	2		C	X		HERBS	G						G	4	1	14		G						G	5	1	2	2	2
0	0	1103005	11030050204	0	1	24	1	5	0	1	2		X			HERBS									2												2	2	2
0	0	1103005	11030050205	0	1	24	1	5	0	1	2		C	X		INJECTION	B						B	4	2												2	2	2
0	0	1103006	11030060206	0	1	48	1	6	1	1	1		X			INJECTION	G						G	4	2												2	2	2
0	0	1103007	11030070206	0	1	33	1	6	1	2															2												2	2	2
0	0	1103008	11030080207	0	1	35	1	7	1	2															2												2	2	2
0	0	1103008	11030080206	0	1	35	1	7	1	2															2												2	2	2
0	0	1103009	11030090205	0	1	29	1	6	1	2															1	3		G						G	2	1	2	2	2
0	0	1103009	11030090206	0	1	29	1	6	1	2															2												2	2	2
0	0	1103010	11030100204	0	1	38	1	5	1	2															2												2	2	2
0	0	1103010	11030100205	0	1	38	1	5	1	2															2												2	2	2
0	0	1103011	11030110205	0	1	40	1	5	1	2															2												2	2	2
0	0	1103012	11030120206	0	1	65	1	6	0	2															2												2	2	2
0	0	1103012	11030120205	0	1	65	1	6	0	2															2												2	2	2
0	0	1103013	11030130108	0	1	42	2	8	1	1	1		G				G						G	3	2												2	2	2
0	0	1103014	11030140207	0	1	40	1	7	1	2															2												2	2	2
0	0	1103015	11030150211	0	1	58	1	12	0	2															2												2	2	2
0	0	1103015	11030150209	0	1	58	1	12	0	2															2												2	2	2
0	0	1103015	11030150210	0	1	58	1	12	0	2															2												2	2	2
0	0	1103016	11030160205	0	2	36	1	7	1	2															2												2	2	2
0	0	1103016	11030160206	0	2	36	1	7	1	2															2												2	2	2
0	0	1103017	11030170206	0	1	40	1	6	1	1	1		X			COLDFLEX	G						G	3	1	3										1	2	2	2
0	0	1103018	11030180203	0	1	28	1	3	1	2															2												2	2	2
0	0	1103019	11030190205	0	2	39	1	5	1	2															2												2	2	2
0	0	1103019	11030190204	0	2	39	1	5	1	2															2												2	2	2
0	0	1103020	11030200204	0	1	21	1	4	0	1	1		X			PIRITEX	H						H	1	2												2	2	2
0	0	1103020	11030200203	0	1	21	1	4	0	1	1		X			PILITON	H						H	1	1	14		H						H	3	1	2	2	2
0	0	1103021	11030210204	0	1	29	1	5	1	1	1		C	G	X	PILLITON	G						G		1	7		H						H	0	1	2	2	2
0	0	1103021	11030210205	0	1	29	1	5	1	1	1		C	G	X	PILLITON	G						G		2												2	2	2
0	0	1103022	11030220207	0	2	32	1	8	1	2															2												2	2	2
0	0	1103022	11030220208	0	2	32	1	8	1	1	2		A												2												2	2	2
0	0	1103023	11030230204	0	2	23	1	4	1	1	1		A												2												2	2	2
0	0	1103024	11030240203	0	2	22	1	3	1	2															2												2	2	2
0	0	1103025	11030250206	0	1	35	1	6	1	1	1		Z				H						H		2												2	2	2
0	0	1103026	11030260203	0	1	32	1	4	1	1	2		X			FLUCAP	G						G	1	2												2	2	2
0	0	1103026	11030260204	0	1	32	1	4	1	1	2		X			FLUCAP	G						G	1	2												2	2	2
0	0	1103102	11031020103	0	3	38	2	3	2	1	2		X			KABUTI SYRUP									2												2	2	2
0	0	1103104	11031040205	0	3	43	1	7	4	2															2												2	2	2
0	0	1103104	11031040206	0	3	43	1	7	4	2															2												2	2	2
0	0	1103104	11031040207	0	3	43	1	7	4	2															2												2	2	2
0	0	1103105	11031050205	0	3	48	1	5	2	2															2												2	2	2
0	0	1103106	11031060207	0	2	36	1	8	1	1	2		X			KABUTI SYRUP	G						G	0	2												2	2	2
0	0	1103106	11031060208	0	2	36	1	8	1	2															2												2	2	2
0	0	1103107	11031070204	0	3	29	1	4	1	1	2		Z												2												2	2	2
0	0	1103107	11031070203	0	3	29	1	4	1	1	2		Z												2												2	2	2
0	0	1103108	11031080205	0	3	59	1	6	2	2															2												2	2	2
0	0	1103108	11031080206	0	3	59	1	6	2	2															2												2	2	2
0	0	1103109	11031090105	0	2	31	2	5	2	1	1		G				G						G		1	7		G						G	0	1	1	2	2	0	3	B
0	0	1103110	11031100102	0	2	24	2	3	1	1	2		D				C	G					G		1	7		G						G	0	1	1	2	2	0	3	C
0	0	1103110	11031100103	0	2	24	2	3	1	1	2		D				C	G					G		1	7		G						G	0	1	1	2	2	0	3	C
0	0	1103111	11031110110	0	3	40	2	10	2	1	2		G				G						G	0	1	0		G						G	0	1	1	2	2	0	3	B
0	0	1103111	11031110109	0	3	40	2	10	2	2															1	0		G						G	0	1	1	2	2	0	3	B
0	0	1103112	11031120104	0	2	72	2	4	1	2															2												2	2	2
0	0	1103113	11031130104	0	3	30	1	4	1	1	2		E				G						G	0	1	7		G						G	0	1	1	2	2	0	3	C
0	0	1103113	11031130103	0	3	30	1	4	1	1	2		E				G						G	0	1	7		G						G	0	1	1	2	2	0	3	C
0	0	1103114	11031140102	0	2	21	2	2	2	1	2		F				G						G		1	7		G						G	2	1	1	2	2	0	3	B
0	0	1103115	11031150107	0	3	35	1	10	1	2															2												2	2	2
0	0	1103115	11031150109	0	3	35	1	10	1	2															2												2	2	2
0	0	1103115	11031150108	0	3	35	1	10	1	2															2												2	2	2
0	0	1103115	11031150105	0	3	35	1	10	1	1	2		G				C						C		1	0		C						C	0	1	1	2	2	0	3	B
0	0	1103116	11031160104	0	3	36	2	5	1		2														2												2	2	2
0	0	1103116	11031160103	0	3	36	2	5	1		2														1	0		C							0	1	1	2	2	0	3	B
0	0	1103117	11031170102	0	1	59	2	3	1	1	2		D				G						G	0	1	6		G						G	0	2	2	2	2
0	0	1103117	11031170103	0	1	59	2	3	1	1	2		D				G						G	0	1	6		G						G	0	2	2	2	2
0	0	1103118	11031180204	0	2	30	1	5	1	1	2		C	G			G						G	4	1	14		G						G	3	1	1	2	2	3	2	C
0	0	1103118	11031180205	0	2	30	1	5	1	1	2		C	G			G						G	3	1	14		G						G	3	1	1	2	2	3	2	C
0	0	1103118	11031180203	0	2	30	1	5	1	1	2		C	G			G						G	3	1	14		G						G	3	1	1	2	2	3	2	C
0	0	1103119	11031190211	0	2	40	1	11	1	2															2												2	2	2
0	0	1103120	11031200205	0	3	42	1	6	4	2															1	14		G						G	0	1	2	2	2
0	0	1103120	11031200204	0	3	42	1	6	4	2															1	14		G						G	0	1	2	2	2
0	0	1103121	11031210102	0	3	23	2	2	2	1	2		G				G						G	2	2												2	2	2
0	0	1103122	11031220205	0	3	35	1	5	2	2															1	7		G						G	0	1	2	2	2
0	0	1103123	11031230203	0	3	28	1	4	2	1	2		G				G						G	0	2												2	2	2
0	0	1103123	11031230204	0	3	28	1	4	2	1	1		G				G						G	3	2												2	2	2
0	0	1103124	11031240206	0	3	31	1	6	2	1	2		X			PIRITON SYRUP	G						G	0	1	14		G						G	0	1	1	2	2	0	3	C
0	0	1103125	11031250203	0	3	33	1	3	2	2															2												2	2	2
0	0	1103126	11031260203	0	3	26	1	3	1	1	1		X			SYRUP	G						G	1	2												2	2	2
0	0	1103201	11032010104	0	1	29	2	4	0	2															2												2	2	2
0	0	1103202	11032020104	0	3	28	2	4	1	1	1		D				C						C	1	2												2	2	2
0	0	1103203	11032030104	0	1	67	2	4	1	1	1		C	G			G						G	3	2												2	2	2
0	0	1103203	11032030102	0	1	67	2	4	1	1	1		C	G			G						G	3	2												2	2	2
0	0	1103204	11032040203	0	2	43	1	3	1	1	1		Z				J						J	1	2												2	2	2
0	0	1103205	11032050102	0	3	27	2	2	2	2															2												2	2	2
0	0	1103206	11032060203	0	2	25	1	3	1	2															1	14										1	2	2	2
0	0	1103207	11032070106	0	3	30	2	6	1	2															2												2	2	2
0	0	1103207	11032070105	0	3	30	2	6	1	2															1	4		G						G	1	1	1	2	2	0	3	C
0	0	1103208	11032080104	0	1	35	2	4	1	2															2												2	2	2
0	0	1103209	11032090203	0	3	26	1	3	2	1	1		G				D						D	1	2												2	2	2
0	0	1103210	11032100203	0	1	30	1	5	1	2															2												2	2	2
0	0	1103210	11032100205	0	1	30	1	5	1	1	2		G	X		KABUUTI	G						G	5	1	7		G						G	5	1	1	2	2	0	3	C
0	0	1103210	11032100204	0	1	30	1	5	1	1	2		G	X		KABUUTI	G						G	3	1	5		G						G	0	2	2	2	2
0	0	1103211	11032110206	0	1	57	1	6	0	2															2												2	2	2
0	0	1103212	11032120107	0	3	42	2	10	1	1	2		X			ZEDEX									2												2	2	2
0	0	1103212	11032120108	0	3	42	2	10	1	1	1		X			ZEDEX									2												2	2	2
0	0	1103212	11032120910	0	3	42	2	10	1	1	2		X			ZEDEX									2												2	2	2
0	0	1103213	11032130206	0	3	47	1	6	1	2															2												2	2	2
0	0	1103214	11032140203	0	3	32	1	3	4	1	2		C	F			G						G	2	2												2	2	2
0	0	1103215	11032150206	0	2	29	1	6	1	2															1	1		C						C	1	1	2	2	2
0	0	1103216	11032160108	0	2	39	2	8	2	2															2												2	2	2
0	0	1103217	11032170106	0	3	24	2	7	1	2															2												2	2	2
0	0	1103218	11032180203	0	3	54	1	4	2	2															2												2	2	2
0	0	1103219	11032190103	0	2	32	1	9	1	1	1		X			COUGH FLULICTUS	H						H	0	2												2	2	2
0	0	1103219	11032190102	0	2	32	1	9	1	1	1		X			COUGH FLULICTUS SYRUP	H						H	2	2												2	2	2
0	0	1103219	11032190105	0	2	32	1	9	1	1	1		X			COUGH FLULICTUS	H						H	3	2												2	2	2
0	0	1103220	11032200203	0	3	41	1	7	1	2															2												2	2	2
0	0	1103221	11032210204	0	3	37	1	6	2	1	1		G				G						G	0	2												2	2	2
0	0	1103221	11032210203	0	3	37	1	6	2	1	1		D	G			G						G	0	1	4		G						G	0	1	1	2	2	0	3	C
0	0	1103221	11032210205	0	3	37	1	6	2	2															2												2	2	2
0	0	1103222	11032220204	0	3	31	1	4	4	2															2												2	2	2
0	0	1103222	11032220203	0	3	31	1	4	4	2															2												2	2	2
0	0	1103223	11032230102	0	2	23	2	2	1	2															2												2	2	2
0	0	1103224	11032240103	0	1	37	2	8	1	1	2		A												2												2	2	2
0	0	1103224	11032240102	0	1	37	2	8	1	1	2		A												2												2	2	2
0	0	1103225	11032250204	0	3	30	1	4	2	1	2		X			KWESIMA HERBAL SYRUP	H						H	1	2												2	2	2
0	0	1103225	11032250203	0	3	30	1	4	2	1	1		X			KWESIMA HERBAL SYRUP	H						H	1	2												2	2	2
0	0	1103226	11032260204	0	2	34	1	5	1	2															1	14		B						B	2	1	2	2	2
0	0	1103226	11032260203	0	2	34	1	5	1	2															1	14		B						B	2	1	2	2	2
0	0	1103301	11033010207	0	1	59	1	7	1	1	2		X			HERBAL									2												2	2	2
0	0	1103305	11033050103	0	2	43	2	3	1	2															2												2	2	2
0	0	1103306	11033060102	0	1	23	2	2	1	2															2												2	2	2
0	0	1103307	11033070102	0	3	24	2	2	2	1	2		X			FLUCAP SYRUP									2												2	2	2
0	0	1103308	11033080107	0	1	67	1	7	0	1	2		Z												2												2	2	2
0	0	1103308	11033080106	0	1	67	1	7	0	2															2												2	2	2
0	0	1103309	11033090104	0	1	33	2	5	0	1	2		X			HERBAL SYRUP	H						H	0	2												2	2	2
0	0	1103309	11033090105	0	1	33	2	5	0	2															2												2	2	2
0	0	1103310	11033100203	0	2	29	1	5	1	2															2												2	2	2
0	0	1103310	11033100204	0	2	29	1	5	1	2															2												2	2	2
0	0	1103310	11033100205	0	2	29	1	5	1	1	1		A												2												2	2	2
0	0	1103311	11033110203	0	2	38	1	4	1	2															2												2	2	2
0	0	1103311	11033110204	0	2	38	1	4	1	2															2												2	2	2
0	0	1103312	11033120103	0	2	56	2	6	3	2															2												2	2	2
0	0	1103312	11033120105	0	2	56	2	6	3	1	2		G				G						G		2												2	2	2
0	0	1103312	11033120104	0	2	56	2	6	3	2															2												2	2	2
0	0	1103313	11033130207	0	1	38	1	7	1	2															1	0		G						G	0	1	1	2	2	0	3	B
0	0	1103313	11033130206	0	1	38	1	7	1	2															1	0		G						G	0	1	1	2	2	0	3	B
0	0	1103314	11033140204	0	1	38	1	4	1	2															1	8		C						C	0	1	1	2	2	0	3	B
0	0	1103315	11033150205	0	1	48	1	7	0	1	2		G				G						G	0	1	8		G						G	3	1	1	2	2	0	3	C
0	0	1103315	11033150206	0	1	48	1	7	0	1	2		G				G						G	0	1	8		G						G	3	1	1	2	2	0	3	C
0	0	1103316	11033160206	0	2	50	2	11	2	1	2		A												1	7										2	2	2	2
0	0	1103316	11033160207	0	2	50	2	11	2	1	2		A												1	7										2	2	2	2
0	0	1103316	11033160203	0	2	50	2	11	2	1	2		A												1	7										2	2	2	2
0	0	1103317	11033170104	0	2	26	1	4	2	2															2												2	2	2
0	0	1103317	11033170103	0	2	26	1	4	2	1	2		G				C						C		2												2	2	2
0	0	1103318	11033180208	0	1	41	1	9	1	2															2												2	2	2
0	0	1103318	11033180209	0	1	41	1	9	1	2															2												2	2	2
0	0	1103319	11033190204	0	1	26	1	4	1	2															2												2	2	2
0	0	1103319	11033190203	0	1	26	1	4	1	1	1		A												2												2	2	2
0	0	1103320	11033200203	0	1	53	1	3	1	1	2		Z				C						C	3	2												2	2	2
0	0	1103321	11033210209	0	1	43	1	10	1	1	2		G				C						C	2	2												2	2	2
0	0	1103321	11033210208	0	1	43	1	10	1	1	2		G				C						C	2	1	7		C						C			2	2	2
0	0	1103322	11033220203	0	1	47	1	4	1	2															2												2	2	2
0	0	1103322	11033220204	0	1	47	1	4	1	1	1		E	X		INJECTIONS	G						G		1			G						G	4	1	2	2	2
0	0	1103323	11033230203	0	2	35	1	5	2	1	2		F				G						G	2	2												2	2	2
0	0	1103323	11033230205	0	2	35	1	5	2	1	1		F				G						G	2	2												2	2	2
0	0	1103324	11033240208	0	1	58	1	8	1	2															2												2	2	2
0	0	1103325	11033250203	0	1	23	1	4	1	2															2												2	2	2
0	0	1103325	11033250204	0	1	23	1	4	1	1	2		A												2												2	2	2
0	0	1103326	11033260207	0	1	67	1	8	1	2															2												2	2	2
0	0	1103401	11034010207	0	1	53	1	7	0	1	1		A												2												2	2	2
0	0	1103402	11034020210	0	1	41	1	10	0	2															2												2	2	2
0	0	1103402	11034020209	0	1	41	1	10	0	1	2		C	G			C						C	7	2												2	2	2
0	0	1103403	11034030806	0	1	57	2	8	1	2															1	14		C						C	5	1	1	2	2	4	8	B
0	0	1103404	11034040207	0	1	48	1	10	1	1	1		D	G			G						G	3	2												2	2	2
0	0	1103404	11034040205	0	1	48	1	10	1	2															2												2	2	2
0	0	1103404	11034040206	0	1	48	1	10	1	2															2												2	2	2
0	0	1103405	11034050206	0	3	31	1	6	2	2															2												2	2	2
0	0	1103405	11034050204	0	3	31	1	6	2	2															1	7		C						C	3	1	1	2	2	3	3	B
0	0	1103406	11034060405	0	1	57	1	5	0	1	1		C	E			C						C	8	1	14		G						G	2	1	2	2	2
0	0	1103407	11034070203	0	1	30	1	4	1	2															1	7		C						C	2	1	2	2	2
0	0	1103407	11034070204	0	1	30	1	4	1	2															1	7		C						C	2	1	2	2	2
0	0	1103408	11034080204	0	2	42	1	9	1	1	1		G												2												2	2	2
0	0	1103408	11034080203	0	2	42	1	9	1	2															2												2	2	2
0	0	1103409	11034090203	0	2	36	1	4	1	2															2												2	2	2
0	0	1103410	11034100205	0	1	75	2	5	0	2															2												2	2	2
0	0	1103411	11034110109	0	1	33	2	10	1	2															2												2	2	2
0	0	1103411	11034110408	0	1	33	2	10	1	2															2												2	2	2
0	0	1103412	11034120205	0	1	25	1	6	1	1	1		D	G			C						C	2	1	7		C						C	2	1	1	2	2	2	2	B
0	0	1103413	11034130105	0	1	21	2	5	0	2															2												2	2	2
0	0	1103414	11034140205	0	2	31	1	4	1	1	2		C	G			C						C	3	2												2	2	2
0	0	1103414	11034140203	0	2	31	1	4	1	1	2		C	G			C						C	3	2												2	2	2
0	0	1103414	11034140204	0	2	31	1	4	1	1	2		C	G			C						C	3	2												2	2	2
0	0	1103415	11034150210	0	3	48	1	10	2	2															2												2	2	2
0	0	1103416	11034160204	0	1	58	1	8	1	1	1		C	G	X	PIRITON	C						C	0	1	4		C						C	1	1	1	2	2	0	4	B
0	0	1103416	11034160206	0	1	58	1	8	1	1	1		C	G	X	PIRITON	C						C	2	1	3		C						C	7	1	1	2	2	0	4	B
0	0	1103416	11034160203	0	1	58	1	8	1	1	1		C	G	X	PIRITON	C						C	1	1	3		C						C	1	1	1	2	2	0	4	B
0	0	1103417	11034170204	0	1	27	1	5	1	2															2												2	2	2
0	0	1103417	11034170203	0	1	27	1	5	1	2															2												2	2	2
0	0	1103418	11034180203	0	1	46	1	10	1	2															2												2	2	2
0	0	1103419	11034190203	0	1	63	1	7	0	1	2		C	G			C						C	2	2												2	2	2
0	0	1103420	11034200203	0	1	50	1	5	0	1	1		C	G	X	PIRITON	C						C	2	2												2	2	2
0	0	1103421	11034210203	0	1	32	1	6	1	1	2		C	G	X	PIRITON	C						C	0	2												2	2	2
0	0	1103421	11034210204	0	1	32	1	6	1	1	2		C	G	X	PIRITON	C						C	0	2												2	2	2
0	0	1103422	11034220203	0	1	34	1	5	1	1	1		C	D			C						C	0	1	5		C						C	0	1	2	2	2
0	0	1103422	11034220204	0	1	34	1	5	1	1	1		C	D			C						C	2	2												2	2	2
0	0	1103423	11034230203	0	1	30	1	3	1	2															2												2	2	2
0	0	1103424	11034240203	0	1	42	1	6	1	2															2												2	2	2
0	0	1103425	11034250103	0	1	49	1	8	1	1	1		C	G			C						C	2	2												2	2	2
0	0	1103425	11034250108	0	1	49	1	8	1	1	1		C	G			C						C	2	2												2	2	2
0	0	1103425	11034250104	0	1	49	1	8	1	1	1		C	G			C						C	2	2												2	2	2
0	0	1103426	11034260205	0	1	36	1	7	1	2															2												2	2	2
0	0	1103426	11034260203	0	1	36	1	7	1	2															2												2	2	2
0	0	1103426	11034260204	0	1	36	1	7	1	2															2												2	2	2
0	0	1103501	11035010206	0	3	35	1	6	1	2															2												2	2	2
0	0	1103502	11035020305	0	3	45	2	5	4	1	2		Z												2												2	2	2
0	0	1103502	11035020304	0	3	45	2	5	4	1	2		Z												2												2	2	2
0	0	1103503	11035030206	0	3	42	1	6	2	1	1		X			KABUTI SYRUP									2												2	2	2
0	0	1103504	11035040103	0	3	30	2	3	1	1	2		C												2												2	2	2
0	0	1103505	11035050203	0	3	23	1	4	1	2															1	7		H						H	4	1	2	2	2
0	0	1103505	11035050204	0	3	23	1	4	1	1	1		X			VEIN INJECTION	A						A	7	2												2	2	2
0	0	1103506	11035060203	0	3	30	1	3	2	2															2												2	2	2
0	0	1103507	11035070205	0	3	40	1	5	2	2															2												2	2	2
0	0	1103508	11035080205	0	3	26	1	5	1	2															2												2	2	2
0	0	1103508	11035080204	0	3	26	1	5	1	2															2												2	2	2
0	0	1103509	11035090203	0	3	35	1	4	2	2															2												2	2	2
0	0	1103509	11035090204	0	3	35	1	4	2	2															2												2	2	2
0	0	1103510	11035100203	0	3	26	1	3	2	1	2		X			VITAMIN C	G						G	0	2												2	2	2
0	0	1103511	11035110204	0	3	31	1	4	4	1	2		Z				G						G	0	2												2	2	2
0	0	1103512	11035120206	0	3	40	1	6	2	2															2												2	2	2
0	0	1103513	11035130204	0	3	21	1	3	3	2															2												2	2	2
0	0	1103513	11035130203	0	3	21	1	3	3	1	2		Z												2												2	2	2
0	0	1103514	11035140203	0	3	35	1	4	4	2															2												2	2	2
0	0	1103515	11035150204	0	3	27	1	4	2	2															2												2	2	2
0	0	1103515	11035150203	0	3	27	1	4	2	2															2												2	2	2
0	0	1103516	11035160205	0	3	35	1	5	2	2															2												2	2	2
0	0	1103516	11035160204	0	3	35	1	5	2	2															2												2	2	2
0	0	1103517	11035170102	0	3	17	2	2	2	1	2		X			VITAMIN C								0	2												2	2	2
0	0	1103518	11035180205	0	3	41	1	5	2	2															2												2	2	2
0	0	1103519	11035190204	0	3	45	1	6	2	2															2												2	2	2
0	0	1103519	11035190203	0	3	45	1	6	2	2															2												2	2	2
0	0	1103520	11035200103	0	2	40	1	3	1	2															2												2	2	2
0	0	1103521	11035210206	0	3	35	1	6	2	2															2												2	2	2
0	0	1103522	11035220207	0	3	36	1	7	2	1	1		Z				G						G	0	1	14		G						G	2	1	2	2	2
0	0	1103523	11035230103	0	2	70	2	3	4	2															2												2	2	2
0	0	1103524	11035240313	0	3	60	2	13	4	2															2												2	2	2
0	0	1103524	11035240312	0	3	60	2	13	4	2															2												2	2	2
0	0	1103525	11035250204	0	3	49	1	4	2	2															2												2	2	2
0	0	1103526	11035260213	0	3	46	1	13	2	2															2												2	2	2
0	0	1103526	11035260212	0	3	46	1	13	2	2															2												2	2	2
0	0	1103526	11035260211	0	3	46	1	13	2	2															2												2	2	2
0	0	1103601	11036010206	0	1	35	2	6	1	2															2												2	2	2
0	0	1103602	11036020207	0	2	26	1	7	0	1	2		D	G			H						H	2	2												2	2	2
0	0	1103603	11036030209	0	2			9	1	1	2		A												2												2	2	2
0	0	1103604	11036040206	0	1	27	1	6	1	1	2		G	X		VITAMIN C	H						H	2	2												2	2	2
0	0	1103604	11036040205	0	1	27	1	6	1	2															2												2	2	2
0	0	1103605	11036050205	0	2	27	1	5	2	2															2												2	2	2
0	0	1103605	11036050204	0	2	27	1	5	2	2															2												2	2	2
0	0	1103606	11036060203	0	2	30	1	3	2	1	2		G	X		VIT & SYRUP									2												2	2	2
0	0	1103607	11036070205	0	2	68	1	5	1	1	2		G				A						A	0	2												2	2	2
0	0	1103608	11036080205	0	1	52	1	5	1	1	2		A												2												2	2	2
0	0	1103609	11036090206	0	2	32	1	7	1	1	2		G				H						H	3	2												2	2	2
0	0	1103609	11036090207	0	2	32	1	7	1	1	2		D	G			H						H	3	2												2	2	2
0	0	1103610	11036100204	0	3	45	1	4	2	1	2		G				G						G	2	2												2	2	2
0	0	1103611	11036110203	0	2	28	1	3	1	1	1		X			LOCAL HERBS									1	3										1	2	2	2
0	0	1103612	11036120107	0	3	80	2	10	0	2															2												2	2	2
0	0	1103612	11036120110	0	3	80	2	10	0	2															2												2	2	2
0	0	1103612	11036120109	0	3	80	2	10	0	2															2												2	2	2
0	0	1103613	11036130203	0	1	38	1	5	1	2															2												2	2	2
0	0	1103613	11036130205	0	1	38	1	5	1	2															2												2	2	2
0	0	1103613	11036130204	0	1	38	1	5	1	2															2												2	2	2
0	0	1103614	11036140203	0	3	32	1	3	1	2															2												2	2	2
0	0	1103615	11036150206	0	2	35	1	7	1	1	1		X			PRITEX	C	G					G	2	1	7		C	G					C	2	1	1	2	2	0	3	B
0	0	1103615	11036150207	0	2	35	1	7	1	1	1		X			PRITEX	C	G					G	2	1	7		C	G					C	2	1	1	2	2	0	3	B
0	0	1103616	11036160204	0	3	31	1	4	2	1	2		G	X		VITAMIN C	G						G	2	2												2	2	2
0	0	1103617	11036170202	0	2	24	2	2	3	2															2												2	2	2
0	0	1103618	11036180105	0	3	37	2	7	2	2															2												2	2	2
0	0	1103619	11036190207	0	1	55	1	8	1	1	2		G				A						A	4	2												2	2	2
0	0	1103619	11036190208	0	1	55	1	8	1	1	1		G				A						A	4	1	7		A						A	2	1	2	2	2
0	0	1103620	11036200204	0	1	70	2	4	0	2															2												2	2	2
0	0	1103621	11036210205	0	1	27	1	6	1	1	2		G				A						A	7	1	14		A						A	7	1	2	2	2
0	0	1103621	11036210204	0	1	27	1	6	1	1	2		A												2												2	2	2
0	0	1103621	11036210206	0	1	27	1	6	1	2															2												2	2	2
0	0	1103622	11036220207	0	1	38	1	7	0	2															1	7		G						G	2	1	1	2	2	2	3	C
0	0	1103623	11036230209	0	2	40	1	9	1	2															2												2	2	2
0	0	1103623	11036230207	0	2	40	1	9	1	1	2		G												2												2	2	2
0	0	1103623	11036230208	0	2	40	1	9	1	1	2		G												2												2	2	2
0	0	1103624	11036240208	0	2	42	1	8	0	1	2		X			COLDCAP									2												2	2	2
0	0	1103624	11036240207	0	2	42	1	8	0	1	2		X			COLDCAP									2												2	2	2
0	0	1103625	11036250207	0	1	42	1	7	1	2															2												2	2	2
0	0	1103626	11036260106	0	1	70	2	6	0	2															2												2	2	2
0	0	1103702	11037020104	0	1	59	2	5	1	2															2												2	2	2
0	0	1103702	11037020105	0	1	59	2	5	1	2															2												2	2	2
0	0	1103703	11037030103	0	2	20	2	3	1	1	2		A												2												2	2	2
0	0	1103703	11037030102	0	2	20	2	3	1	1	2		A												2												2	2	2
0	0	1103704	11037040104	0	1	36	2	4	0	1	2		X			COTRIMOXAZOLE	G						G	1	2												2	2	2
0	0	1103705	11037050105	0	1	32	2	5	0	2															2												2	2	2
0	0	1103706	11037060105	0	1	73	2	5	1	1	2		Z												2												2	2	2
0	0	1103708	11037080206	0	2	34	1	6	1	1	1		X			AZUDOX SYRUP	G						G	2	1	7		G						G	2	1	2	2	2
0	0	1103709	11037090206	0	1	32	1	7	0	2															2												2	2	2
0	0	1103709	11037090205	0	1	32	1	7	0	2															2												2	2	2
0	0	1103710	11037100207	0	2	53	1	8	2	2															2												2	2	2
0	0	1103711	11037110102	0	1	46	2	4	1	1	2		G				G						G	0	2												2	2	2
0	0	1103712	11037120204	0	2	25	1	4	1	1	2		G				G						G		2												2	2	2
0	0	1103713	11037130206	0	2	40	1	6	1	1	1		D				G						G		1	7		G						G	0	1	1	2	2	0	3	B
0	0	1103714	11037140405	0	2	27	2	5	2	2															2												2	2	2
0	0	1103714	11037140103	0	2	27	2	5	2	2															2												2	2	2
0	0	1103715	11037150108	0	2	38	2	8	2	1	2		D				G						G		1	0		G						G	0	1	1	2	2	0	3	C
0	0	1103715	11037150107	0	2	38	2	8	2	1	2		D				G						G		1	0		G						G	0	1	1	2	2	0	3	C
0	0	1103716	11037160215	0	1	25	1	6	1	1	1		G				G						G	0	1	0		G						G	0	1	1	2	2	0	3	C
0	0	1103716	11037160216	0	1	25	1	6	1	1	1		G				G						G	0	1	0		G						G	0	1	1	2	2	0	3	C
0	0	1103717	11037170108	0	1	26	2	8	1	2															2												2	2	2
0	0	1103717	11037170107	0	1	26	2	8	1	1	2		G				G						G	0	2												2	2	2
0	0	1103718	11037180207	0	2	64	1	8	1	2															2												2	2	2
0	0	1103718	11037180208	0	2	64	1	8	1	2															2												2	2	2
0	0	1103719	11037190203	0	2	30	1	4	2	1	2		G				G						G	1	1	8		G						G	3	1	2	2	2
0	0	1103719	11037190204	0	2	30	1	4	2	1	2		G				G						G	1	1	8		G						G	3	1	2	2	2
0	0	1103720	11037200205	0	1	53	1	6	1	2															1	7										2	2	2	2
0	0	1103720	11037200206	0	1	53	1	6	1	2															1	7										2	2	2	2
0	0	1103721	11037210203	0	1	27	1	3	1	2															2												2	2	2
0	0	1103722	11037220209	0	2	36	1	9	1	1	1		G				G						G	0	1	14		G						G	1	1	1	2	2	1	3	C
0	0	1103722	11037220208	0	2	36	1	9	1	1	1		G				G						G	0	1	14		G						G	1	1	1	2	2	1	3	C
0	0	1103722	11037220207	0	2	36	1	9	1	1	1		G				G						G	0	1	14		G						G	1	1	1	2	2	1	3	C
0	0	1103723	11037230402	0	2	22	1	4	1	2															2												2	2	2
0	0	1103723	11037230403	0	2	22	1	4	1	2															2												2	2	2
0	0	1103724	11037240105	0	1	60	2	6	0	1	2		X			HERBS									2												2	2	2
0	0	1103724	11037240106	0	1	60	2	6	0	2															2												2	2	2
0	0	1103725	11037250104	0	1	50	2	4	1	2															2												2	2	2
0	0	1103726	11037260308	0	2	62	2	8	1	1	2						G						G	3	2												2	2	2
0	0	1103726	11037260307	0	2	62	2	8	1	2															2												2	2	2
0	0	1103801	11038010204	0	2	22	1	4	1	1	1		G				H						H	2	1	7		H						H	2	1	2	2	2
0	0	1103801	11038010203	0	2	22	1	4	1	1	1		G				H						H	2	1	7		H						H	2	1	2	2	2
0	0	1103802	11038020203	0	1	63	1	3	0	2															2												2	2	2
0	0	1103803	11038030203	0	1	36	1	3	1	2															2												2	2	2
0	0	1103804	11038040203	0	1	28	1	3	1	2															2												2	2	2
0	0	1103805	11038050505	0	1	54	1	6	0	2															2												2	2	2
0	0	1103806	11038060204	0	1	25	1	4	0	2															2												2	2	2
0	0	1103806	11038060203	0	1	25	1	4	0	2															2												2	2	2
0	0	1103807	11038070204	0	2	26	1	4	1	1	2		X			FLUCAP									1	13		H						H	3	1	2	2	2
0	0	1103807	11038070203	0	2	26	1	4	1	1	2		X			FLUCAP									2												2	2	2
0	0	1103808	11038080102	0	1	27	2	2	1	1	2		G				H						H	7	2												2	2	2
0	0	1103809	11038090205	0	2	25	1	5	1	2															2												2	2	2
0	0	1103809	11038090204	0	2	25	1	5	1	1	1		D				G						G		2												2	2	2
0	0	1103810	11038100206	0	1	32	1	6	1	2															2												2	2	2
0	0	1103810	11038100205	0	1	32	1	6	1	2															2												2	2	2
0	0	1103811	11038110203	0	1	27	1	3	1	2															2												2	2	2
0	0	1103812	11038120208	0	1	49	1	8	0	1	1		A												2												2	2	2
0	0	1103813	11038130209	0	1	39	1	9	1	2															2												2	2	2
0	0	1103813	11038130208	0	1	39	1	9	1	2															2												2	2	2
0	0	1103814	11038140203	0	1	22	1	4	1	2															2												2	2	2
0	0	1103815	11038150203	0	1	27	1	3	1	1	1		D				G						G	0	2												2	2	2
0	0	1103816	11038160203	0	2	27	1	3	2	1	1		D				G						G	2	1	14		G						G	0	1	2	2	2
0	0	1103817	11038170204	0	3	34	1	4	2	2															2												2	2	2
0	0	1103818	11038180204	0	1	50	1	4	0	1	2		X			HERBS									1	7		C						C	3	1	1	2	2	3	3	B
0	0	1103819	11038190206	0	1	29	1	6	0	1	2		G				C						C	2	2												2	2	2
0	0	1103819	11038190205	0	1	29	1	6	0	1	2		G				C						C	2	1	3										1	2	2	2
0	0	1103820	11038200203	0	1	27	1	4	0	2															2												2	2	2
0	0	1103820	11038200204	0	1	27	1	4	0	2															2												2	2	2
0	0	1103821	11038210206	0	1	40	1	6	0	2															1	14		C						C	3	1	1	2	2	3	3	B
0	0	1103822	11038220204	0	1	25	1	5	1	2															2												2	2	2
0	0	1103822	11038220203	0	1	25	1	5	1	2															2												2	2	2
0	0	1103822	11038220205	0	1	25	1	5	1	1	2		G				G						G	2	2												2	2	2
0	0	1103823	11038230203	0	3	33	1	7	2	1	2		G				G						G	4	2												2	2	2
0	0	1103824	11038240203	0	1	37	1	5	1	2															2												2	2	2
0	0	1103824	11038240204	0	1	37	1	5	1	2															2												2	2	2
0	0	1103825	11038250206	0	1	50	1	6	1	1	2		X			HERBS									2												2	2	2
0	0	1103826	11038260207	0	1	40	1	7	1	1	2		G				C						C	7	1	7		C						C	2	1	1	2	2	2	2	B
0	0	1103826	11038260206	0	1	40	1	7	1	2															2												2	2	2
0	0	1103901	11039010203	0	2	70	1	3	1	2															2												2	2	2
0	0	1103902	11039020203	0	3	72	1	4	2	2															2												2	2	2
0	0	1103903	11039030106	0	2	35	2	7	1	1	1		G												1	6										1	2	2	2
0	0	1103903	11039030107	0	2	35	2	7	1	2															2												2	2	2
0	0	1103904	11039040106	0	3	67	2	6	0	2															1	1										1	2	2	2
0	0	1103905	11039050408	0	3	27	1	13	2	2															2												2	2	2
0	0	1103905	11039050311	0	3	27	1	13	2	2															2												2	2	2
0	0	1103905	11039050410	0	3	27	1	13	2	2															1	5		G						G	5	1	1	2	2	0	3	C
0	0	1103906	11039060203	0	3	49	1	5	2	2															2												2	2	2
0	0	1103907	11039070203	0	1	34	1	3	1	1	1		X			CODAFEX	B						B	4	2												2	2	2
0	0	1103908	11039080104	0	3	63	2	4	1	2															2												2	2	2
0	0	1103909	11039090205	0	2	32	1	7	2	2															1	2		C						C	2	1	1	2	2	0	8	B
0	0	1103909	11039090206	0	2	32	1	7	2	2															1	4		C						C	4	1	1	2	2	0	8	B
0	0	1103909	11039090207	0	2	32	1	7	2	1	1		G				C						C	4	1	4		C						C	4	1	1	2	2	0	8	B
0	0	1103910	11039100105	0	3	39	2	5	2	2															2												2	2	2
0	0	1103911	11039110109	0	3	36	2	8	1	1	2		D	G			G						G	0	1	7		G						G	0	1	2	2	2
0	0	1103912	11039120102	0	1	50	2	3	1	2															2												2	2	2
0	0	1103913	11039130103	0	2	20	2	3	1	2															2												2	2	2
0	0	1103914	11039140103	0	2	38	2	11	1	2															2												2	2	2
0	0	1103914	11039140104	0	2	38	2	11	1	2															1	7		G						G	0	1	2	2	2
0	0	1103914	11039140105	0	2	38	2	11	1	2															2												2	2	2
0	0	1103915	11039150105	0	2	29	2	5	1	2															2												2	2	2
0	0	1103916	11039160205	0	1	29	1	5	1	2															2												2	2	2
0	0	1103917	11039170205	0	1	27	2	6	1	2															2												2	2	2
0	0	1103918	11039180205	0	1	31	1	6	1	2															2												2	2	2
0	0	1103918	11039180204	0	1	31	1	6	1	2															2												2	2	2
0	0	1103918	11039180203	0	1	31	1	6	1	1	2		X			VIT C & FLUCAP	H						H	0	1			H						H	0	1	1	2	2	0	1	C
0	0	1103919	11039190203	0	2	32	1	5	1	1	2		C	G			H						H	2	1	7		H						H	2	1	2	2	2
0	0	1103920	11039200203	0	2	70	1	10	1	1	2		C	G			H						H	2	1	7		H						H	1	1	2	2	2
0	0	1103921	11039210203	0	2	42	1	6	1	1	1		X			CAP SYRUP	H						H	2	2												2	2	2
0	0	1103922	11039220204	0	2	49	1	7	2	2															2												2	2	2
0	0	1103922	11039220203	0	2	49	1	7	2	2															1	14		G						G	0	1	2	2	2
0	0	1103923	11039230203	0	3	37	1	6	2	2															2												2	2	2
0	0	1103924	11039240204	0	2	28	1	7	1	1	1		C				B						B	3	1	7		B						B	1	1	1	2	2	1	3	B
0	0	1103924	11039240203	0	2	28	1	7	1	1	1		C				B						B	3	1	7		B						B	2	1	1	2	2	2	3	B
0	0	1103924	11039240205	0	2	28	1	7	1	1	2		C				B						B	3	1	7		B						B	2	1	1	2	2	2	3	B
0	0	1103925	11039250203	0	2	47	1	9	1	2															2												2	2	2
0	0	1103926	11039260204	0	2	25	1	4	1	1	2		X			X-PEN	H						H	3	1	11		H						H	3	1	2	2	2
0	0	1103926	11039260203	0	2	25	1	4	1	1	1		D				H						H	3	2												2	2	2
0	0	1104003	11040030206	0	3	39	1	6	1	2															2												2	2	2
0	0	1104005	11040050204	0	3	45	1	5	1	2															2												2	2	2
0	0	1104005	11040050205	0	3	45	1	5	1	2															2												2	2	2
0	0	1104006	11040060203	0	2	30	2	3	1	1	2		A												1	3		H						H	0	1	2	2	2
0	0	1104008	11040080208	0	2	50	1	9	3	2															2												2	2	2
0	0	1104008	11040080209	0	2	50	1	9	3	1	2		D				H						H	1	2												2	2	2
0	0	1104009	11040090205	0	3	39	2	5	2	2															2												2	2	2
0	0	1104009	11040090204	0	3	39	2	5	2	1	2		X			FLUCAP									2												2	2	2
0	0	1104010	11040100107	0	1	45	2	9	1	2															2												2	2	2
0	0	1104011	11040110204	0	1	28	1	5	1	2															2												2	2	2
0	0	1104011	11040110205	0	1	28	1	5	1	2															2												2	2	2
0	0	1104011	11040110203	0	1	28	1	5	1	2															2												2	2	2
0	0	1104012	11040120203	0	1	30	1	3	0	2															2												2	2	2
0	0	1104013	11040130203	0	2	30	1	5	1	2															1	0		G						G	0	1	1	2	2	0	3	B
0	0	1104014	11040140205	0	1	28	1	5	0	1	2		G				G						G	0	1	0										2	2	2	2
0	0	1104014	11040140204	0	1	28	1	5	0	1	2		G				G						G	0	1	0										2	2	2	2
0	0	1104015	11040150204	0	2	23	1	4	2	1	1		D				G						G	0	2												2	2	2
0	0	1104015	11040150203	0	2	23	1	4	2	1	1		D				G						G	0	2												2	2	2
0	0	1104016	11040160206	0	1	28	1	7	1	1	2		G				G						G	2	2												2	2	2
0	0	1104016	11040160208	0	1	28	1	7	1	1	2		G				G						G	2	2												2	2	2
0	0	1104017	11040170205	0	1	31	1	5	1	1	2		G				G						G	0	1	7		G						G	0	1	1	2	2	1		B
0	0	1104017	11040170204	0	1	31	1	5	1	1	2		G				G						G	0	1	7		G						G	0	1	1	2	2	1		B
0	0	1104018	11040180207	0	1	39	1	7	1	2															1	7		A						A	2	1	2	2	2
0	0	1104018	11040180206	0	1	39	1	7	1	2															1	7		A						A	2	1	2	2	2
0	0	1104019	11040190210	0	3	56	1	11	1	1	2		G				H						H	1	1	14		H						H	1	1	2	2	2
0	0	1104019	11040190209	0	3	56	1	11	1	1	2		G				H						H	1	2												2	2	2
0	0	1104019	11040190211	0	3	56	1	11	1	2															2												2	2	2
0	0	1104020	11040200207	0	2	46	1	7	1	1	2		G				G						G	7	1	2		B						B	2	1	2	2	2
0	0	1104020	11040200206	0	2	46	1	7	1	2															1	2		B						B	2		2	2	2
0	0	1104021	11040210205	0	2	33	1	5	0	2															2												2	2	2
0	0	1104022	11040220207	0	2	38	1	7	1	1	2		E				G						G	3	1	10		G						G	3	1	1	2	2	3	3	C
0	0	1104023	11040230206	0	3	29	1	6	1	2															1	7		G						G	0	1	2	2	2
0	0	1104023	11040230205	0	3	29	1	6	1	2															1	7		G						G	0	1	2	2	2
0	0	1104024	11040240203	0	1	52	1	9	1	1	1		D				G						G	7	1	3		A						A	3	1	2	2	2
0	0	1104025	11040250207	0	2	29	1	8	1	2															2												2	2	2
0	0	1104025	11040250205	0	2	29	1	8	1	2															2												2	2	2
0	0	1104025	11040250206	0	2	29	1	8	1	2															1	14		G						G	0	1	1	2	2	0	3	C
0	0	1104026	11040260207	0	3	31	1	7	1	2															2												2	2	2
0	0	1161401	11614010203	0	1	35	1	4	1	1	2		D				G						G	1	2												2	2	2
0	0	1161401	11614010204	0	1	35	1	4	1	1	2		D				G						G	1	2												2	2	2
0	0	1161402	11614020205	0	2	32	1	7	2	2															2												2	2	2
0	0	1161402	11614020206	0	2	32	1	7	2	1	2		A												2												2	2	2
0	0	1161402	11614020207	0	2	32	1	7	2	2															2												2	2	2
0	0	1161403	11614030203	0	2	21	1	3	2	1	2		A												2												2	2	2
0	0	1161404	11614040204	0	2	28	1	5	2	1	2		X			FLUCAP	H						H	4	2												2	2	2
0	0	1161404	11614040205	0	2	28	1	5	2	1	2		X			FLUCAP	H						H	4	2												2	2	2
0	0	1161405	11614050206	0	3	29	1	7	2	1	2		D				G						G	1	2												2	2	2
0	0	1161405	11614050205	0	3	29	1	7	2	1	2		D				G						G	2	2												2	2	2
0	0	1161405	11614050207	0	3	29	1	7	2	1	2		D				G						G	0	2												2	2	2
0	0	1161406	11614060204	0	2	38	2	4	1	2															2												2	2	2
0	0	1161407	11614070204	0	3	23	1	4	1	1	2		G				G						G	0	2												2	2	2
0	0	1161407	11614070203	0	3	23	1	4	1	1	2		G				G						G	1	2												2	2	2
0	0	1161408	11614080104	0	1	39	2	4	1	2															2												2	2	2
0	0	1161408	11614080103	0	1	39	2	4	1	2															2												2	2	2
0	0	1161409	11614090207	0	2	40	1	7	1	2															2												2	2	2
0	0	1161409	11614090206	0	2	40	1	7	1	1	2		D	G			H						H	0	2												2	2	2
0	0	1161410	11614100206	0	1	38	1	10	1	2															2												2	2	2
0	0	1161410	11614100207	0	1	38	1	10	1	1	2		D				H						H	0	1	98		H						H		1	2	2	2
0	0	1161411	11614110206	0	3	9	1	6	2	2															1	7		C						C	0	1	1	2	2	0	3	B
0	0	1161412	11614120211	0	2	63	1	13	1	1	1		D				C						C	0	1	98		B						B		1	1	2	2	0	3
0	0	1161412	11614120212	0	2	63	1	13	1	1	1		D				C						C	0	1	98		B						B		1	1	2	2	0	3
0	0	1161412	11614120213	0	2	63	1	13	1	1	1		D				C						C	0	1	98		B						B		1	1	2	2	0	3
0	0	1161412	11614120209	0	2	63	1	13	1	1	1						C						C		1	98		C						C		1	1	2	2	0	3
0	0	1161412	11614120210	0	2	63	1	13	1	1	1						C						C		1	98		C						C		1	1	2	2	0	3
0	0	1161413	11614130103	0	2	46	2	7	1	2															1	8										2	2	2	2
0	0	1161414	11614140105	0	1	57	2	5	1	2															2												2	2	2
0	0	1161414	11614140104	0	1	57	2	5	1	2															1	3										1	1	2	2	1	3	A
0	0	1161415	11614150205	0	2	54	1	6	1	2															2												2	2	2
0	0	1161416	11614160208	0	2	45	1	8	1	1	2		D				C	H					H	2	2												2	2	2
0	0	1161417	11614170204	0	1	38	1	8	1	2															2												2	2	2
0	0	1161417	11614170206	0	1	38	1	8	1	2															2												2	2	2
0	0	1161418	11614180209	0	2	41	1	10	1	2															2												2	2	2
0	0	1161419	11614191914	0	3	74	1	14	2	1	2		X			MULULUZA									1	4		A						A	2	1	1	2	2	2	2	B
0	0	1161419	11614191913	0	3	74	1	14	2	1	2		X			HERBAL									1	4		A						A	2	1	1	2	2	2	2	B
0	0	1161420	11614200210	0	2	38	1	10	1	1	2		X			HERBAL									2												2	2	2
0	0	1161420	11614200209	0	2	38	1	10	1	1	2		X			HERBAL									2												2	2	2
0	0	1161422	11614220207	0	2	40	1	7	1	1	2		G				H						H	2	1	2		H						H	2	1	2	2	2
0	0	1161423	11614230102	0	1	30	2	3	1	2															2												2	2	2
0	0	1161423	11614230103	0	1	30	2	3	1	1	1		E				H						H	0	2												2	2	2
0	0	1161424	11614240207	0	3	40	1	7	3	2															2												2	2	2
0	0	1161424	11614240206	0	3	40	1	7	3	1	1		G				G						G	0	1	7		G						G	2	1	1	2	2	0	3	B
0	0	1161424	11614240205	0	3	40	1	7	3	1	1		G				G						G	0	1	7		G						G	2	1	1	2	2	0	3	B
0	0	1161425	11614250102	0	2	30	2	10	2	1	1		G				H						H	4	1	2		H						H	0	1	2	2	2
0	0	1161425	11614250906	0	2	30	2	10	2	1	1		E				J						J	3	1	7		J						J	3	1	1	2	2	3	3	C
0	0	1161425	11614250103	0	2	30	2	10	2	1	1		G				H						H	4	1	2		H						H	0	1	2	2	2
0	0	1161425	11614251005	0	2	30	2	10	2	1	1		E				A						A	2	1	2		A						A	2	2	2	2	2
0	0	1161425	11614250104	0	2	30	2	10	2	1	1		G				H						H	4	2												2	2	2
0	0	1161426	11614260206	0	1	70	2	6	0	2															2												2	2	2
0	0	1161426	11614260205	0	1	70	2	6	0	2															2												2	2	2
0	0	1161501	11615010207	0	2	32	1	7	1	1	2		X			LOCAL									2												2	2	2
0	0	1161501	11615010206	0	2	32	1	7	1	1	2		X			LOCAL									2												2	2	2
0	0	1161502	11615020209	0	2	56	1	9	2	1	1		D	G			C						C	3	1	7		C						C	2	1	2	2	2
0	0	1161503	11615030211	0	1	42	1	12	1	1	2		G				C						C	3	2												2	2	2
0	0	1161503	11615030212	0	1	42	1	12	1	1	1		G				C						C	3	2												2	2	2
0	0	1161504	11615040206	0	2	43	1	6	1	1	2		G				H						H	0	2												2	2	2
0	0	1161505	11615050207	0	3	35	1	7	0	1	2		G				B						B	3	1			F			HEALTH CENTRE IV			F	3	1	1	2	2	3	3	B
0	0	1161506	11615060204	0	2	30	1	4	3	1	2		D				H						H	2	2												2	2	2
0	0	1161507	11615070205	0	1	33	1	5	1	2															2												2	2	2
0	0	1161508	11615080307	0	1	70	2	7	0	2															2												2	2	2
0	0	1161509	11615090208	0	2	40	1	8	1	2															1	7		A						A		1	1	2	2	1	4	B
0	0	1161510	11615100209	0	1	52	1	9	1	2															2												2	2	2
0	0	1161511	11615110208	0	1	40	1	8	1	2															2												2	2	2
0	0	1161511	11615110207	0	1	40	1	8	1	2															2												2	2	2
0	0	1161512	11615120208	0	2	34	1	8	1	1	2		A												2												2	2	2
0	0	1161513	11615130206	0	1	32	1	6	1	1	2		A												2												2	2	2
0	0	1161514	11615140208	0	1	33	1	8	1	2															2												2	2	2
0	0	1161515	11615150203	0	2	26	1	3	2	1	1		A												2												2	2	2
0	0	1161516	11615160306	0	1	50	1	7	0	1	2		X			HERBS									2												2	2	2
0	0	1161516	11615160307	0	1	50	1	7	0	1	2		X			HERBS									2												2	2	2
0	0	1161517	11615170206	0	2	28	1	6	1	2															2												2	2	2
0	0	1161518	11615180204	0	2	28	1	4	2	1	1		G				A						A	2	2												2	2	2
0	0	1161518	11615180203	0	2	28	1	4	2	2															2												2	2	2
0	0	1161519	11615190103	0	1	44	2	4	0	1	2		G				A						A	3	1	7		A						A	3	1	1	2	2	3	2	B
0	0	1161520	11615200204	0	3	30	1	5	2	1	1		G	X		HERBS	A						A	3	1	7		A						A	3	1	1	2	2	3	4	B
0	0	1161520	11615200205	0	3	30	1	5	2	1	1		G	X		HERBS									2												2	2	2
0	0	1161521	11615210203	0	2	32	1	4	2	1	2		G												2												2	2	2
0	0	1161521	11615210204	0	2	32	1	4	2	1	2		G												2												2	2	2
0	0	1161522	11615220209	0	2	47	1	9	1	1	2		X			HERB									2												2	2	2
0	0	1161522	11615220207	0	2	47	1	9	1	1	2		X			HERB									2												2	2	2
0	0	1161522	11615220208	0	2	47	1	9	1	1	2		X			HERB									2												2	2	2
0	0	1161523	11615230205	0	2	31	1	5	2	1	2		X			VITAMIN C	H						H	2	2												2	2	2
0	0	1161524	11615240207	0	2	56	1	7	1	2															1	2		C						C	2	1	1	2	2	0	3	B
0	0	1161524	11615240206	0	2	56	1	7	1	2															2												2	2	2
0	0	1161525	11615250203	0	2	35	1	4	3	2															1	2		C						C	2	1	1	2	2	0	3	B
0	0	1161525	11615250204	0	2	35	1	4	3	2															2												2	2	2
0	0	1161526	11615260205	0	2	26	1	5	2	1	1		G				C						C	3	2												2	2	2
0	0	1161526	11615260204	0	2	26	1	5	2	2															2												2	2	2
0	0	1161601	11616010207	0	3	40	1	8	2	2															2												2	2	2
0	0	1161601	11616010208	0	3	40	1	8	2	1	2		G				G						G	7	2												2	2	2
0	0	1161602	11616020103	0	3	48	2	3	2	1	1		G				G						G	3	1	3		G						G	3	1	1	2	2	2	3	C
0	0	1161603	11616030203	0	3	28	1	4	2	2															2												2	2	2
0	0	1161603	11616030204	0	3	28	1	4	2	1	1		X			BOMBO									2												2	2	2
0	0	1161604	11616040206	0	3	38	1	6	1	1	2		D	G			C						C	2	2												2	2	2
0	0	1161604	11616040205	0	3	38	1	6	1	1	2		D	G			C						C	2	2												2	2	2
0	0	1161605	11616050205	0	2	29	1	6	1	2															2												2	2	2
0	0	1161605	11616050206	0	2	29	1	6	1	2															2												2	2	2
0	0	1161605	11616050204	0	2	29	1	6	1	2															1	7		G						G	1	1	2	2	2
0	0	1161606	11616060203	0	2	45	1	4	0	2															1	98		G						G	1	1	2	2	2
0	0	1161606	11616060202	0	2	45	1	4	0	2															2												2	2	2
0	0	1161607	11616070205	0	3	31	1	6	2	1	1		A												2												2	2	2
0	0	1161607	11616070204	0	3	31	1	6	2	2															2												2	2	2
0	0	1161607	11616070306	0	3	31	1	6	2	1	1		G				G						G	1	2												2	2	2
0	0	1161608	11616080206	0	1	47	1	6	0	1	2		D				G						G	3	1	7		G						G	5	1	1	2	2	0	5	C
0	0	1161609	11616090103	0	2	44	2	6	1	1	1		D	G			C						C	2	2												2	2	2
0	0	1161610	11616100103	0	3	22	2	5	1	2															2												2	2	2
0	0	1161610	11616100104	0	3	22	2	5	1	2															2												2	2	2
0	0	1161611	11616110203	0	1	26	1	3	1	1	1		X			FANSIDAR	B						B	2	1	3		B						B	4	1	1	2	2	0	4	B
0	0	1161612	11616120607	0	3	36	2	7	2	2															2												2	2	2
0	0	1161613	11616130204	0	2	31	1	5	1	1	1		D				C						C	2	1	7		C						C	2	1	1	2	2	0	4	C
0	0	1161613	11616130203	0	2	31	1	5	1	2															2												2	2	2
0	0	1161614	11616140203	0	1	34	1	8	1	1	1		D				H						H	3	1	11		E						E	4	1	2	2	2
0	0	1161615	11616150203	0	1	42	1	3	0	1	1		G				H						H	7	1	4		H						H	7	1	1	2	2	0	2	E
0	0	1161616	11616160203	0	2	39	1	6	1	1	2		D				H						H	7	1	7		H						H	3	1	1	2	2	0	2	E
0	0	1161617	11616170203	0	3	51	1	6	2	1	2		D	X		ZEPER	A	I					A	7	2												2	2	2
0	0	1161617	11616170204	0	3	51	1	6	2	2															2												2	2	2
0	0	1161618	11616180203	0	2	37	1	6	1	1	1		D												2												2	2	2
0	0	1161619	11616190203	0	2	35	1	6	2	2															2												2	2	2
0	0	1161620	11616200103	0	3	34	2	4	2	1	8		D	G			H						H	2	2												2	2	2
0	0	1161621	11616210103	0	3	21	2	4	2	1	1		D				C						C	4	1	2		G						G	0	1	2	2	2
0	0	1161622	11616220107	0	2	33	2	7	0	2															2												2	2	2
0	0	1161623	11616230205	0	3	40	1	10	2	2															2												2	2	2
0	0	1161623	11616230206	0	3	40	1	10	2	2															2												2	2	2
0	0	1161623	11616230204	0	3	40	1	10	2	2															2												2	2	2
0	0	1161624	11616240204	0	1	39	1	9	0	2															2												2	2	2
0	0	1161624	11616240203	0	1	39	1	9	0	2															2												2	2	2
0	0	1161625	11616250205	0	2	29	1	7	1	1	2		E	X		PIRITEX SYRUP	H						H	10	1	10		H						H	2	1	2	2	2
0	0	1161625	11616250204	0	2	29	1	7	1	1	2		X			PIRITEX SYRUP	H						H	4	1	10		H						H	2	1	2	2	2
0	0	1161625	11616250203	0	2	29	1	7	1	1	1		X			PIRITEX SYRUP	H						H	0	1	14		H						H	0	2	2	2	2
0	0	1161626	11616260203	0	3	38	1	5	3	1	2		G				A						A	1	1	14		A						A	1	1	1	2	2	0	3	B
0	0	1161626	11616260204	0	3	38	1	5	3	1	2		C	X		X-PEN	A						A	1	1	14		A						A	1	1	1	2	2	0	3	B
0	0	1161701	11617010205	0	1	32	1	5	1	2															2												2	2	2
0	0	1161701	11617010204	0	1	32	1	5	1	2															2												2	2	2
0	0	1161703	11617030102	0	1	20	2	3	1	2															2												2	2	2
0	0	1161703	11617030103	0	1	20	2	3	1	2															2												2	2	2
0	0	1161704	11617040205	0	2	43	1	5	1	2															2												2	2	2
0	0	1161705	11617050204	0	3	30	1	4	2	1	2		X			UNITRIM SYRUP	G						G	2	2												2	2	2
0	0	1161706	11617060104	0	1	30	2	5	2	2															2												2	2	2
0	0	1161706	11617060105	0	1	30	2	5	2	1	2		G				N						N	7	1	14		N						N	0	1	2	2	2
0	0	1161707	11617070207	0	1	81	1	7	1	1	1		G				G						G		2												2	2	2
0	0	1161708	11617080204	0	2	22	1	4	1	1	2		D				G						G		2												2	2	2
0	0	1161708	11617080203	0	2	22	1	4	1	2															2												2	2	2
0	0	1161709	11617090203	0	2	24	1	3	1	2															2												2	2	2
0	0	1161710	11617100208	0	2	40	1	9	1	2															2												2	2	2
0	0	1161710	11617100209	0	2	40	1	9	1	2															2												2	2	2
0	0	1161711	11617110206	0	3	30	1	7	2	1	2		G				H						H		2												2	2	2
0	0	1161711	11617110205	0	3	30	1	7	2	2															2												2	2	2
0	0	1161711	11617110207	0	3	30	1	7	2	2															2												2	2	2
0	0	1161712	11617120110	0	2	48	1	11	1	2															2												2	2	2
0	0	1161712	11617120111	0	2	48	1	11	1	1	1		E	X		HERBAL	H						H		2												2	2	2
0	0	1161713	11617130205	0	2	37	1	5	1	2															1	7		B						B	7	1	1	2	2	4	3	B
0	0	1161714	11617140205	0	1	25	1	5	0	2															2												2	2	2
0	0	1161715	11617150203	0	2	40	1	3	1	1	2		A												2												2	2	2
0	0	1161716	11617160103	0	1	38	2	3	1	1	2		X			COLDAFEX	H						H	2	1	4		G						G	0	1	1	2	2	0	4	C
0	0	1161716	11617160102	0	1	38	2	3	1	2															2												2	2	2
0	0	1161717	11617170204	0	1	27	1	4	1	2															2												2	2	2
0	0	1161717	11617170203	0	1	27	1	4	1	2															2												2	2	2
0	0	1161718	11617180205	0	1	28	1	6	1	1	2		G				C						C	3	1	98		C						C		1	1	2	2	0	3	B
0	0	1161718	11617180206	0	1	28	1	6	1	1	2		G				C						C	3	1	98		C						C		1	1	2	2	0	3	B
0	0	1161718	11617180203	0	1	28	1	6	1	1	2		G				C						C	3	1	98		C						C		1	1	2	2	0	3	B
0	0	1161719	11617190105	0	1	23	2	5	1	2															2												2	2	2
0	0	1161719	11617190206	0	1	23	2	5	1	2															2												2	2	2
0	0	1161719	11617190104	0	1	23	2	5	1	2															2												2	2	2
0	0	1161720	11617200204	0	1	37	1	5	1	1	2		G				C						C	2	1	98										2	2	2	2
0	0	1161720	11617200203	0	1	37	1	5	1	1	2		G				C						C	0	1	98										2	2	2	2
0	0	1161722	11617220204	0	2	25	1	4	1	1	2		D	G			C						C	0	1	7		C						C		1	1	2	2	1	3
0	0	1161722	11617220203	0	2	25	1	4	1	1	2		D	G			C						C	0	1	7		C						C		1	1	2	2	1	3
0	0	1161723	11617230211	0	2	39	1	11	1	1	2		X			BOMBO									2												2	2	2
0	0	1161723	11617230210	0	2	39	1	11	1	1	2		X			BOMBO									2												2	2	2
0	0	1161724	11617240511	0	3	55	2	12	1	1	1		Z				J						J	2	1	7		J						J	0	2	2	2	2
0	0	1161724	11617240512	0	3	55	2	12	1	1	1		Z				J						J	2	1	7		J						J	0	2	2	2	2
0	0	1161725	11617250208	0	2	54	1	9	1	2															1	3		J						J	0	1	2	2	2
0	0	1161725	11617250209	0	2	54	1	9	1	2															1	2		J						J	0	1	2	2	2
0	0	1161726	11617260203	0	1	32	1	3	1	2															1	4		H						H	1	1	2	2	2
0	0	1161801	11618010108	0	3	39	2	8	0	1	1		G				C						C	1	1	7		C						C	2	1	1	2	2	0	7	B
0	0	1161801	11618010105	0	3	39	2	8	0	1	1		G				C						C	1	1	7		C						C	2	1	1	2	2	0	7	B
0	0	1161802	11618020209	0	3	47	1	9	2	2															2												2	2	2
0	0	1161802	11618020207	0	3	47	1	9	2	2															2												2	2	2
0	0	1161803	11618030205	0	2	35	1	5	1	1	2		G				C						C	1	2												2	2	2
0	0	1161804	11618040206	0	3	32	1	6	1	2															2												2	2	2
0	0	1161804	11618040205	0	3	32	1	6	1	2															2												2	2	2
0	0	1161805	11618050204	0	3	35	1	5	1	1	2		G				C						C	3	1	7		C						C	2	1	1	2	2	1	6	B
0	0	1161805	11618050205	0	3	35	1	5	1	1	2		G				C						C	3	1	4		C						C	1	1	2	2	2
0	0	1161806	11618060210	0	2	36	1	10	1	1	2		A												2												2	2	2
0	0	1161806	11618060209	0	2	36	1	10	1	1	2		A												2												2	2	2
0	0	1161807	11618070108	0	1	56	2	8	1	2															2												2	2	2
0	0	1161807	11618070107	0	1	56	2	8	1	2															2												2	2	2
0	0	1161807	11618070106	0	1	56	2	8	1	2															2												2	2	2
0	0	1161808	11618080103	0	1	55	2	3	0	1	2		G				C						C	3	2												2	2	2
0	0	1161809	11618090102	0	3	46	1	2	1	2															2												2	2	2
0	0	1161810	11618100102	0	3	22	2	2	4	2															2												2	2	2
0	0	1161811	11618110205	0	2	40	1	5	1	1	2		C	X		CAPSULE	G						G	1	2												2	2	2
0	0	1161812	11618120104	0	1	31	2	5	1	2															2												2	2	2
0	0	1161812	11618120105	0	1	31	2	5	1	2															2												2	2	2
0	0	1161813	11618130205	0	3	45	1	5	1	2															2												2	2	2
0	0	1161813	11618130204	0	3	45	1	5	1	2															2												2	2	2
0	0	1161814	11618140103	0	2	25	2	7	1	2															2												2	2	2
0	0	1161814	11618140106	0	2	25	2	7	1	1	1		D				G						G	2	1	7		G						G	0	1	1	2	2	1	3	C
0	0	1161814	11618140104	0	2	25	2	7	1	1	2		D				G						G	2	2												2	2	2
0	0	1161815	11618150206	0	3	58	1	7	1	1	1		C	G			G						G	2	1	7		G						G	0	1	1	2	2	0	3	C
0	0	1161816	11618160204	0	3	45	1	9	1	2															2												2	2	2
0	0	1161816	11618160203	0	3	45	1	9	1	2															1	3		C						C	1	1	2	2	2
0	0	1161817	11618170205	0	2	34	1	6	1	1	2		D				G						G	2	2												2	2	2
0	0	1161817	11618170206	0	2	34	1	6	1	1	1		D				G						G	2	2												2	2	2
0	0	1161818	11618180203	0	2	70	1	5	1	1	2		X			LOCAL HERBS									2												2	2	2
0	0	1161818	11618180204	0	2	70	1	5	1	1	2		X			LOCAL HERBS									2												2	2	2
0	0	1161819	11618190203	0	2	31	1	6	1	1	1		D				L				PVT.HEALTH CENTRE 3		L	4	1	10		F			PVT.HEALTH CENTRE 3			F	0	1	2	2	2
0	0	1161819	11618190204	0	2	31	1	6	1	1	1		D				L				PVT.HEALTH CENTRE 3		L	4	1	10		F			PVT.HEALTH CENTRE 3			F	1	1	2	2	2
0	0	1161820	11618200203	0	2	32	1	6	1	1	1		D				L				PVT.HEALTH CENTRE 3		L	4	1	7		L				PVT.HEALTH CENTRE 3		L	0	1	1	2	2	0	3	C
0	0	1161821	11618210204	0	3	23	1	4	1	2															1	5		B						B	0	1	1	2	2	0	3	C
0	0	1161821	11618210203	0	3	23	1	4	1	2															1	4		B						B	0	1	2	2	2
0	0	1161822	11618220203	0	3	34	1	3	4	1	1		X			CETRIZINE SYRUP	A						A	7	2												2	2	2
0	0	1161823	11618230106	0	3	29	2	6	2	2															2												2	2	2
0	0	1161824	11618240203	0	3	45	1	12	1	2															2												2	2	2
0	0	1161824	11618240204	0	3	45	1	12	1	2															2												2	2	2
0	0	1161825	11618250203	0	2	39	1	9	1	1	2		C	G	X	VITAMIN C	B						B	4	2												2	2	2
0	0	1161826	11618260211	0	3	47	1	11	1	2															2												2	2	2
0	0	1161827	11618270203	0	3	22	1	3	2	1	1		C				B	G					B	1	1	14		B						B	2	1	2	2	2
0	0	1161828	11618280203	0	3	22	1	3	2	2															2												2	2	2
0	0	1161901	11619010212	0	3	50	1	12	1	1	2		G				H						H	2	2												2	2	2
0	0	1161901	11619010211	0	3	50	1	12	1	1	2		G				H						H	2	2												2	2	2
0	0	1161903	11619030204	0	1	44	1	5	2	2															2												2	2	2
0	0	1161903	11619030106	0	1	44	1	5	2	1	2		G				H						H	0	2												2	2	2
0	0	1161904	11619040208	0	1	39	1	8	1	1	2		G				L				MISSION		L	0	2												2	2	2
0	0	1161905	11619050205	0	3	29	1	5	1	1	2		G				C						C	2	2												2	2	2
0	0	1161905	11619050204	0	3	29	1	5	1	1	2		G				C						C	2	2												2	2	2
0	0	1161905	11619050203	0	3	29	1	5	1	1	2		G				C						C	2	2												2	2	2
0	0	1161906	11619060203	0	3	32	1	3	1	1	2		E				G						G		1	98		G						G	0	1	1	2	2	0	3	A
0	0	1161907	11619070204	0	3	31	1	5	1	1	2		E				G						G	0	2												2	2	2
0	0	1161907	11619070205	0	3	31	1	5	1	1	2		E				G						G	0	2												2	2	2
0	0	1161907	11619070203	0	3	31	1	5	1	1	2		E				G						G	0	2												2	2	2
0	0	1161908	11619080305	0	2	78	2	12	2	1	1		D				G						G	2	2												2	2	2
0	0	1161908	11619080310	0	2	78	2	12	2	1	2		D				G						G	0	2												2	2	2
0	0	1161908	11619080306	0	2	78	2	12	2	1	1		D				G						G	2	1	6		G						G	0	1	1	2	2	0	3	B
0	0	1161908	11619080312	0	2	78	2	12	2	1	1		D				G						G	2	2												2	2	2
0	0	1161909	11619090205	0	2	26	1	5	1	1	1		F				A						A	2	2												2	2	2
0	0	1161910	11619100210	0	1	30	1	10	1	2															2												2	2	2
0	0	1161911	11619110203	0	3	35	1	3	4	1	2		G				H						H	7	2												2	2	2
0	0	1161912	11619120310	0	1	40	1	10	0	1			G				J						J	3	2												2	2	2
0	0	1161912	11619120308	0	1	40	1	10	0	1	2		G				A	J					J	3	2												2	2	2
0	0	1161912	11619120309	0	1	40	1	10	0	1	2		G				J						J	3	2												2	2	2
0	0	1161913	11619130203	0	3	71	1	3	2	1	2		G				H						H	0	2												2	2	2
0	0	1161914	11619140107	0	3	43	2	7	1	2															2												2	2	2
0	0	1161915	11619150106	0	2	51	2	7	1	1	1		C	G			C						C	0	2												2	2	2
0	0	1161915	11619150105	0	2	51	2	7	1	1	1		A												2												2	2	2
0	0	1161915	11619150107	0	2	51	2	7	1	1	1		C	G			C						C	3	2												2	2	2
0	0	1161916	11619160306	0	3	55	1	6	2	2															2												2	2	2
0	0	1161917	11619170203	0	2	24	1	3	0	2															2												2	2	2
0	0	1161918	11619180207	0	2	42	1	8	1	2															2												2	2	2
0	0	1161919	11619190205	0	2	42	1	5	1	1	1		X			INJECTION	A						A	2	1	14		A						A	2	1	1	2	2	2	4	B
0	0	1161919	11619190204	0	2	42	1	5	1	2															2												2	2	2
0	0	1161920	11619200204	0	3	28	1	4	3	2															2												2	2	2
0	0	1161920	11619200203	0	3	28	1	4	3	2															2												2	2	2
0	0	1161921	11619210203	0	2	25	1	6	1	2															2												2	2	2
0	0	1161921	11619210204	0	2	25	1	6	1	1	2		X			HERBS									2												2	2	2
0	0	1161921	11619210205	0	2	25	1	6	1	1	2		X			HERBS									2												2	2	2
0	0	1161922	11619220209	0	2	38	1	9	2	1	2		D				H						H	2	2												2	2	2
0	0	1161922	11619220208	0	2	38	1	9	2	1	2		D				H						H	2	2												2	2	2
0	0	1161923	11619230103	0	3	35	2	3	2	1	2		X			AMPIELOX	B						B	0	1	6		B						B		1	1	2	2	0	2	B
0	0	1161924	11619240206	0	1	32	1	6	1	1	2		Z				H						H	2	2												2	2	2
0	0	1161925	11619250203	0	2	19	1	3	1	1	2		G				H						H	2	2												2	2	2
0	0	1161926	11619260209	0	3	36	1	11	0	2															2												2	2	2
0	0	1161926	11619260210	0	3	36	1	11	0	2															2												2	2	2
0	0	1161926	11619260211	0	3	36	1	11	0	2															2												2	2	2
0	1	10101	101010206	0	3	50	1	6		1	1	1	B	D	X	ORANGES	X					GRAND MOTHER	X	1	2												2	2	2
0	1	10102	101020208	0	3	43	1	10	2	1	1	2	X			HERBS									2												2	2	2
0	1	10102	101020209	0	3	43	1	10	2	1	1	2	X			HERBS									2												2	2	2
0	1	10103	101030206	0	2	38	1	6		1	2	2	X			HERBS									2												2	2	2
0	1	10103	101030205	0	2	38	1	6	2	1	2	2	X			HERBS									2												2	2	2
0	1	10104	101040203	0	3	23	1	3	1	1	1	2	X			COMBAT SYRUP									1	10	2									1	2	2	2
0	1	10106	101060207	0	3	28	1	7	2	1	1	1	B	D	X	ORANGES	X					GRAND MOTHER	X	1	2												2	2	2
0	1	10107	101070204	0	3	25	1	5	2	1	2	1	D				D						D	6	2												2	2	2
0	1	10107	101070205	0	3	25	1	5	2	1	2	1	D				D						D	5	1	4	1	D						D	1	1	2	2	2
0	1	10108	101080204	0	3	30	1	4	2	1	1	2	D												1	20	1	A						A	1	1	2	2	2
0	1	10109	101090204	0	3	35	1	5	1	1	2	2	C												1	1	2									1	1	2	2	0	3	A
0	1	10109	101090205	0	3	35	1	5	1	1	2	2	C												1	4	2									1	1	2	2	0	2	A
0	1	10109	101090203	0	3	35	1	5	1	1	2	2	C												2												2	2	2
0	1	10110	101100203	0	3	28	1	7	2	1	2	2	D																								2	2	2
0	1	10110	101100205	0	3	28	1	7	2	1	2	2	D																								2	2	2
0	1	10110	101100206	0	3	28	1	7	2	1	2	2	D																								2	2	2
0	1	10111	101110203	0	3	45	1	4		2															2												2	2	2
0	1	10111	101110204	0	3	45	1	4		2															2												2	2	2
0	1	10113	101130205	0	3	27	2	5		1	1		X			SYRUP																					2	2	2
0	1	10113	101130203	0	3	27	2	5		1	1		X			SYRUP																					2	2	2
0	1	10113	101130204	0	3	27	2	5	2	1	1		X			SYRUP																					2	2	2
0	1	10114	101140203	0	3		1	3	2	1	1	2	A												1	3	2									1	2	2	2
0	1	10116	101160203	0	3	29	1	3		1	2	1	C				J						J	4	2												2	2	2
0	1	10119	101190204	0	3	26	1	4	3	2															2												2	2	2
0	1	10122	101220204	0	3	33	1	5	3	2															2												2	2	2
0	1	10122	101220205	0	3	33	1	5	3	2															2												2	2	2
0	1	10123	101230205	0	3	27	1	5	2	2															2												2	2	2
0	1	10123	101230204	0	3	27	1	5	2	2															2												2	2	2
0	1	10124	101240203	0	3	25	1	3	1	2															2												2	2	2
0	1	10125	101250203	0	2	21	1	3		1	1	2	A												2												2	2	2
0	1	10126	101260205	0	3	27	2	5	3	1	2	1	X			COLD CAP VIT C	J						J	3	2												2	2	2
0	1	10126	101260204	0	3	27	2	5	3	2															2												2	2	2
0	1	10203	102030203	0	3	36	1	5		1		1	Z												1	98	1	G									2	2	2
0	1	10207	102071303	0	3	32	1	5	2	2															2												2	2	2
0	1	10208	102080203	0	3	37	1	5	2	1	1	1	X			SYRUP	X					MOTHER	X	3	2												2	2	2
0	1	10209	102090203	0	3	24	2	3	3	2															2												2	2	2
0	1	10210	102100205	0	2	24	1	5		2															2												2	2	2
0	1	10210	102100204	0	2	24	1	5		1	1	1	X			COLD CAPSULE SYRUP	G						G	2	2												2	2	2
0	1	10212	102120204	0	3	37	1	4	2	1	2	2	X			HERBAL									2												2	2	2
0	1	10212	102120203	0	3	37	1	4	2	1	2	1	X			SYRUP	G						G	7	2												2	2	2
0	1	10213	102130203	0	3	28	1	3	3	2															1												2	2	2
0	1	10214	102140208	0	3	35	1	8		1															2												2	2	2
0	1	10215	102150203	0	3	31	1	6		2															2												2	2	2
0	1	10215	102150206	0	3	31	1	6		2															2												2	2	2
0	1	10216	102160203	0	3	22	1	4		2															2												2	2	2
0	1	10216	102160204	0	3	22	1	4		2															2												2	2	2
0	1	10217	102170203	0	2	40	1	4		2															2												2	2	2
0	1	10217	102170204	0	2	40	1	4	0	2															2												2	2	2
0	1	10218	102180207	0	2	30	1	7		2															2												2	2	2
0	1	10218	102180205	0	2	30	1	7		2															2												2	2	2
0	1	10218	102180206	0	2	30	1	7		2															2												2	2	2
0	1	10219	102190312	0	3	44	1	13	2	1	2	2	X			KABUTI HERBAL SYRUP									2												2	2	2
0	1	10223	102230307	0	2	40	2	7		1	2	1	Z				H						H	0	1	14	1	H						H	0	1	2	2	2
0	1	10224	102240204	0	3	38	1	4	3	2															2												2	2	2
0	1	10224	102240203	0	3	38	1	4		2															2												2	2	2
0	1	10225	102250203	0	3	28	1	4		1	2	1	Z				G						G	2	2												2	2	2
0	1	10301	103010306	0	3	48	2	7		2															2												2	2	2
0	1	10301	103010305	0	3	48	2	7		1	2	1	X			RELEX SYRUP	J						J	0	2												2	2	2
0	1	10302	103020212	0	2	40	1	15		1	2	1	G				J						J	0	2												2	2	2
0	1	10302	103020210	0	2	40	1	15	1	1	2	1	G				J						J	0	2												2	2	2
0	1	10302	103020415	0	2	40	1	15		1	1	1	X			LOCAL HERBS	M						M	5	2												2	2	2
0	1	10302	103020211	0	2	40	1	15		1	2	1	G				J						J	0	2												2	2	2
0	1	10303	103030207	0	3	40	1	7		2															2												2	2	2
0	1	10303	103030206	0	3	40	1	7		2															2												2	2	2
0	1	10304	103040308	0	2	42	2	8		1	2	1	X			LOCAL MEDICINE	X					MOTHER	X	2	2												2	2	2
0	1	10304	103040307	0	2	42	2	8	1	1	2	1	X			LOCAL MEDICINE	X					MOTHER	X	22	2												2	2	2
0	1	10304	103040306	0	2	42	2	8		1	2	1	X			LOCAL MEDICINE	X					MOTHER	X	2	2												2	2	2
0	1	10305	103050206	0	2	38	1	6	2	1	2	1	D				G						G	2	2												2	2	2
0	1	10305	103050205	0	2	38	1	6	2	2															2												2	2	2
0	1	10306	103060103	0	2	36	2	3	2	2															2												2	2	2
0	1	10307	103070204	0	2	46	1	4	1	2															1	98	1	C						C	1	1	1	2	2	1	3	B
0	1	10308	103080203	0	3	31	1	3		1	2	1	X			LOCAL HERBS	X					MOTHER	X	0	2												2	2	2
0	1	10309	103090203	0	3	37	1	3		2															2												2	2	2
0	1	10310	103100204	0	3	37	1	7	2	1	2	2	X			HERBS									2												2	2	2
0	1	10310	103100203	0	3	37	1	7	2	2															2												2	2	2
0	1	10311	103110203	0	3	50	1	7	1	1	2	2	C												2												2	2	2
0	1	10312	103120203	0	3	24	1	3		2															2												2	2	2
0	1	10313	103130902	0	3	50	2	9		1	1	1	C	D			G						G	2	2												2	2	2
0	1	10313	103130907	0	3	50	2	9		1	2	1	C	D			G						G	7	1	7	1	I						I	7	1	2	2	2
0	1	10313	103130903	0	3	50	2	9		2															1	98	1	I						I	3	1	2	2	2
0	1	10314	103140206	0	3	50	1	8	4	1	2	1	X			ZECATH SYRUP	G						G	0	1	2	1	G						G	0	1	2	2	2
0	1	10314	103140207	0	3	50	1	8	4	1	2	1	X			ZECATH SYRUP	G						G	0	1	2	1	G						G	0	1	2	2	2
0	1	10315	103150207	0	3	30	1	9	1	2															2												2	2	2
0	1	10315	103150208	0	3	30	1	9	1	1	1	1	X			INJECTION IN THE NERVES	A	G					A	1	1	3	1	J						J	0	1	1	2	2	0	3	C
0	1	10316	103160205	0	3	38	1	8	2	1	2	2	C	D	G										2												2	2	2
0	1	10316	103160207	0	3	38	1	8	2	1	2	1	C	D	G		G						G	3	1	4	1	G						G	7	1	1	2	2	4	4	C
0	1	10316	103160206	0	3	38	1	8	2	1	2	2	C	D	G										2												2	2	2
0	1	10317	103170205	0	3	30	1	5	3	2															1	2	2									2	2	2	2
0	1	10318	103180203	0	3	35	1	7	2	1	2	1	C				D	N					D	2	1	98	2									2	2	2	2
0	1	10318	103180204	0	3	35	1	7	2	2															1	98	1	D						D			2	2	2
0	1	10318	103180205	0	3	35	1	7		1	2	1	C				D	N					D	2	1	98	2									2	2	2	2
0	1	10320	103200204	0	3	40	1	4	1	2															2												2	2	2
0	1	10321	103210204	0	3	27	1	5	2	1	2	1	D				D						D	0	2												2	2	2
0	1	10321	103210203	0	3	27	1	5	2	1	2	1	D				D						D	0	2												2	2	2
0	1	10323	103230203	0	3	45	1	10		2															2												2	2	2
0	1	10323	103230210	0	3	45	1	10		2															2												2	2	2
0	1	10324	103240203	0	3	23	1	3	2	1	2	1	Z				K	L			GRAND MUM		K	6	2												2	2	2
0	1	10325	103250203	0	3	25	1	3	2	1	2	2	X			SYRUP									2												2	2	2
0	1	10401	104010203	0	3	30	1	3	2	2															2												2	2	2
0	1	10403	104030203	0	3	40	1	6	3	1	1	1	B				X					FRIENDS	X	7	2												2	2	2
0	1	10404	104040207	0	2	43	1	7	1	2															2												2	2	2
0	1	10405	104050205	0	3	43	1	5		2															2												2	2	2
0	1	10406	104060208	0	3	45	1	8	3	1	2	2	B	X		SYRUP									2												2	2	2
0	1	10407	104070504	0	3	35	1	5	2	2															2												2	2	2
0	1	10408	104080204	0	3	37	1	5	4	1	2	1	X			SYRUP	G						G	3	2												2	2	2
0	1	10408	104080205	0	3	37	1	5	4	1	2	1	X			SYRUP	G						G	3	2												2	2	2
0	1	10409	104090203	0	3	23	1	3		2															2												2	2	2
0	1	10410	104100204	0	3	27	1	4	2	1	2	1	G				A	G					G	14	2												2	2	2
0	1	10411	104110204	0	3	35	1	4		1	1	1					D						D	2	2												2	2	2
0	1	10411	104110203	0	3	35	1	4	2	2															2												2	2	2
0	1	10412	104120203	0	3	35	1	4	1	2															2												2	2	2
0	1	10413	104130203	0	3	30	1	4	2	1	1	2	A												1	14	2	A							2	1	2	2	2
0	1	10413	104130204	0	3	30	1	4	2	1	1	2	A												2												2	2	2
0	1	10414	104140209	0	3	50	1	9	3	2															2												2	2	2
0	1	10414	104140208	0	3	50	1	9	3	2															2												2	2	2
0	1	10416	104160205	0	3	44	1	5	4	2															2												2	2	2
0	1	10417	104170203	0	3	30	1	3	3	1	1	1	B	C			C						C	1	2												2	2	2
0	1	10418	104180205	0	3	42	1	5	4	1	1	1	B				C						C	1	2												2	2	2
0	1	10418	104180204	0	3	42	1	5	4	1	2	1	B	C	E		C						C	2	2												2	2	2
0	1	10418	104180203	0	3	42	1	5	4	1	2	1	B	C			C						C	3	2												2	2	2
0	1	10419	104190205	0	3	30	1	5	4	2															2												2	2	2
0	1	10419	104190203	0	3	30	1	5	4	2															2												2	2	2
0	1	10419	104190204	0	3	30	1	5	4	2															2												2	2	2
0	1	10420	104200203	0	3	35	2	5	2	2															2												2	2	2
0	1	10422	104220204	0	3	28	1	4	2	2															2												2	2	2
0	1	10423	104230203	0	3	26	1	3	2	2															2												2	2	2
0	1	10424	104240203	0	3	46	1	5		1	2	1	X			COLDAFEX	C						C	4	2												2	2	2
0	1	10425	104250204	0	3	28	1	4		1	2	1	X			SYRUP	G						G	1	2												2	2	2
0	1	10426	104260304	0	3	30	2	5	0	2															2												2	2	2
0	1	10426	104260305	0	3	30	2	5	0	2															2												2	2	2
0	1	10501	105010203	0	2	20	1	3	0	1	2	1	D				G						G	14	2												2	2	2
0	1	10502	105020205	0	3	40	1	5	1	2															2												2	2	2
0	1	10503	105030206	0	3	56	1	6	1	1	2	2	X			KISA KYAMUZADDE									2												2	2	2
0	1	10504	105040204	0	3	30	1	5		1	2	2	D												2												2	2	2
0	1	10504	105040205	0	3	30	1	5	2	1	2	2	D												2												2	2	2
0	1	10505	105050204	0	3	25	1	4	2	1	2	2	X			VIT C									2												2	2	2
0	1	10506	105060205	0	3	25	1	5	2	1	2	1	C	D			G						G	0	2												2	2	2
0	1	10507	105070204	0	3	20	1	5	1	1	2	2	D												2												2	2	2
0	1	10507	105070203	0	3	20	1	5	1	1	2	2	D	G											2												2	2	2
0	1	10508	105080205	0	3	45	1	5		1	2	2	G												1	14	2									1	2	2	2
0	1	10509	105090208	0	2	32	1	9	1	2															2												2	2	2
0	1	10509	105090209	0	2	32	1	9	1	1	2	2													2												2	2	2
0	1	10510	105100204	0	3	45	1	5		2															2												2	2	2
0	1	10510	105100205	0	3	45	1	5		2															2												2	2	2
0	1	10511	105110203	0	3	32	1	5		2															2												2	2	2
0	1	10511	105110204	0	3	32	1	5		2															2												2	2	2
0	1	10512	105120103	0	3	30	2	3	2	2															2												2	2	2
0	1	10513	105130204	0	3	24	1	5		2															2												2	2	2
0	1	10513	105130205	0	3	24	1	5		2															2												2	2	2
0	1	10514	105140204	0	3	24	1	4	3	2															2												2	2	2
0	1	10515	105150205	0	2	35	1	6	1	2															2												2	2	2
0	1	10515	105150204	0	2	35	1	6	1	2															2												2	2	2
0	1	10516	105160205	0	3	37	1	6	2	2															2												2	2	2
0	1	10518	105180203	0	3	35	1	4	4	2															2												2	2	2
0	1	10518	105180204	0	3	35	1	4		2															2												2	2	2
0	1	10519	105190203	0	3	33	1	3	4	1	1	2	X			PIRITEX SYRUP									1	3	1	D						D	1	1	2	2	2
0	1	10520	105200205	0	3	29	1	5		2															2												2	2	2
0	1	10521	105210203	0	3	35	1	3		1	2	1	X			PRITEX SYRUP	G						G	0	2												2	2	2
0	1	10522	105220203	0	3	34	1	5	3	2															2												2	2	2
0	1	10522	105220204	0	3	34	1	5	3	1	2	2	A												2												2	2	2
0	1	10522	105220205	0	3	34	1	5	3	1	2	2	A												2												2	2	2
0	1	10523	105230203	0	3	39	1	3	2	2															2												2	2	2
0	1	10524	105240203	0	3	37	1	4	1	1	1	1	D	F			A						A	5	2												2	2	2
0	1	10524	105240204	0	3	37	1	4		1	2	1	D	F			A						A	6	2												2	2	2
0	1	10526	105260204	0	3	30	1	4	4	1	1	1	D	G			A						A	6	2												2	2	2
0	1	10526	105260203	0	3	30	1	4	4	1	2	1	D	G			A						A	6	2												2	2	2
0	1	10601	106010102	0	3	25	1	4		1	2	2	X			TRADITIONAL									2												2	2	2
0	1	10602	106020103	0	3		2	4	1	2															2												2	2	2
0	1	10602	106020102	0	3		2	4		1	8	2	X			LOCAL									2												2	2	2
0	1	10603	106030103	0	3		2	3	0	1	2	2	X			LOCAL									2												2	2	2
0	1	10605	106050103	0	3	32	2	4	1	1	1	1	X			LOCAL	X					SISTER	X	3	2												2	2	2
0	1	10606	106060103	0	3			5	0	1	1	1	Z				G						G	0	1	13	1	G						G	13	1	1	2	2
0	1	10607	106070103	0	3	25	2	5	2	2															2												2	2	2
0	1	10608	106080103	0	3	33	2	7	2	1	1		A												2												2	2	2
0	1	10609	106090103	0	3	25	2	3	2	2															2												2	2	2
0	1	10614	106140203	0	2	28	1	4	2	1	1	1	D	G			B	H					B		1	98	1	H						H	0	1	2	2	2
0	1	10617	106170506	0	3	35	1	6	4	1	1	1	Z				G						G	0	1	2	1	G						G	0	1	2	2	2
0	1	10621	106210206	0	3	30	1	6		2															2												2	2	2
0	1	10621	106210204	0	3	30	1	6		2															2												2	2	2
0	1	10621	106210205	0	3	30	1	6		1	2	2	X			SYRUP LOCAL HERBAL									2												2	2	2
0	1	10622	106220102	0	3	18	2	2	2	2															2												2	2	2
0	1	10623	106230206	0	3	38	1	6		2															2												2	2	2
0	1	10701	107010209	0	3	68	1	10	4	2															2												2	2	2
0	1	10702	107020204	0	3	35	1	4	4	1	1	2	D												2												2	2	2
0	1	10703	107030203	0	3	25	1	3	1	2															2												2	2	2
0	1	10704	107040410	0			1	10		8	8		Z												2												2	2	2
0	1	10704	107040408	0			1	10		8															2												2	2	2
0	1	10704	107040409	0			1	10		8															2												2	2	2
0	1	10705	107050307	0	3	32	1	7	2	2															2												2	2	2
0	1	10706	107061009	0	3	40	1	10		1	1	1	B	X		HERBS	G						G	2	1	7	2									1	2	2	2
0	1	10707	107070203	0	3	39	1	4	3	1	1	1	X			KABUTI	A						A	2	2												2	2	2
0	1	10707	107070204	0	3	39	1	4	3	1	1	1	X			KABUTI	A						A	2	2												2	2	2
0	1	10708	107080203	0	3	28	1	3	2	2															2												2	2	2
0	1	10709	107090207	0	3	50	1	8	2	2															1	5	2									1	1	2	2	0	4	C
0	1	10709	107090208	0	3	50	1	8	2	2															2												2	2	2
0	1	10710	107100204	0	3	35	1	5	2	1	2	2													2												2	2	2
0	1	10710	107100205	0	3	35	1	5	2	1	2	2	X												2												2	2	2
0	1	10711	107110907	0	3	39	1	9		2															2												2	2	2
0	1	10712	107120203	0	3	28	1	3	4	1	1	2													2												2	2	2
0	1	10713	107130203	0	3	28	1	4		2															2												2	2	2
0	1	10714	107140203	0	2	26	1	3	0	1	2	1	D				D						D	2	2												2	2	2
0	1	10715	107150203	0	3	28	1	3		1	2	1	C				H						H	3	2												2	2	2
0	1	10716	107160203	0	3	29	1	6	1	1	1	1	Z				G						G	3	1	10	1	G						G	1	1	1	2	2	1	5	C
0	1	10716	107160205	0	3	29	1	6	1	2															2												2	2	2
0	1	10716	107160204	0	3	29	1	6		2															2												2	2	2
0	1	10717	107170205	0	3	30	1	6		2															2												2	2	2
0	1	10717	107170206	0	3	30	1	6		1	1	1	B	C			G						G		2												2	2	2
0	1	10718	107180203	0	3	42	1	3	3	1	2	1	G				H						H	2	2												2	2	2
0	1	10719	107190203	0	3	28	1	3	2	2															2												2	2	2
0	1	10720	107200203	0	3	39	1	7		2															2												2	2	2
0	1	10720	107200205	0	3	39	1	7		2															2												2	2	2
0	1	10723	107230204	0	3	51	1	6	2	2															2												2	2	2
0	1	10723	107230206	0	3	51	1	6	2	2															1	3	1	G						G	0	1	2	2	2
0	1	10723	107230205	0	3	51	1	6		2															2												2	2	2
0	1	10724	107240203	0	3	31	1	4	2	2															2												2	2	2
0	1	10725	107250203	0	3	30	1	5	2	2															1	4	1	J						J	1	2	2	2	2
0	1	10725	107250204	0	3	30	1	5	2	2															2												2	2	2
0	1	10726	107260204	0	3	33	1	4	3	2															2												2	2	2
0	1	10726	107260203	0	3	33	1	4	3	2															2												2	2	2
0	1	10802	108020103	0	1	30	1	5		2															2												2	2	2
0	1	10803	108030204	0	3	48	1	4	2	1	1	2	X			COLD CUP									1	3	2									2	2	2	2
0	1	10803	108030203	0	3	48	1	4	2	1	1	2	X			COLD CUP									2												2	2	2
0	1	10804	108040103	0	1	24	2	5	1	2															2												2	2	2
0	1	10804	108040104	0	1	24	2	5	1	2															2												2	2	2
0	1	10804	108040105	0	1	24	2	5	1	1	2	2	X			BOMBO									2												2	2	2
0	1	10805	108050204	0	1		1	5	0	2															2												2	2	2
0	1	10805	108050203	0	1		1	5	0	2															2												2	2	2
0	1	10806	108060203	0	1	28	1	4	0	2															2												2	2	2
0	1	10806	108060204	0	1	28	1	4	0	2															2												2	2	2
0	1	10811	108110102	0	3	26	2	3		2															2												2	2	2
0	1	10813	108130105	0	1	42	2	6	0	2															2												2	2	2
0	1	10814	108140105	0	1	42	2	5	0	2															2												2	2	2
0	1	10815	108150207	0	3	32	1	7	2	1	1	2	X			KAFIN SYRUP									2												2	2	2
0	1	10816	108160107	0	1	50	2	8	0	2															2												2	2	2
0	1	10816	108160208	0	1	50	2	8	0	2															2												2	2	2
0	1	10817	108170105	0	1	70	2	7	1	2															2												2	2	2
0	1	10817	108170104	0	1	70	2	7	1	2															2												2	2	2
0	1	10818	108180204	0	1	31	1	4		1	1	1	X			COLD CUP	G						G	3	2												2	2	2
0	1	10820	108200205	0	2	30	1	7		2															2												2	2	2
0	1	10820	108200207	0	2	30	1	7		2															2												2	2	2
0	1	10820	108200206	0	2	30	1	7		2															2												2	2	2
0	1	10821	108210207	0	1	58	1	7		2															2												2	2	2
0	1	10821	108210206	0	1	58	1	7		2															2												2	2	2
0	1	10822	108220206	0	2	38	2	6		1	2	1	Z				G						G	1	2												2	2	2
0	1	10823	108230203	0	1	30	1	4		2															2												2	2	2
0	1	10823	108230204	0	1	30	1	4		2															1	7	2									1	2	2	2
0	1	10824	108240205	0	1	60	1	5		2															2												2	2	2
0	1	10826	108260204	0	2	30	1	4		2															2												2	2	2
0	1	10826	108260203	0	2	30	1	4		2															2												2	2	2
0	1	10901	109010605	0	3	55	1	7	3	2															2												2	2	2
0	1	10901	109010607	0	3	55	1	7	3	2															2												2	2	2
0	1	10902	109020203	0	3	29	1	3	2	2															2												2	2	2
0	1	10903	109030203	0	3	22	1	3	1	2															1	7	1	G						G	2	1	2	2	2
0	1	10905	109050206	0	3	62	2	6	1	1	2	1	F				G						G	0	2												2	2	2
0	1	10906	109060203	0	2	28	1	4	2	2															2												2	2	2
0	1	10906	109060204	0	2	28	1	4	2	2															2												2	2	2
0	1	10907	109070204	0	3	28	1	4	2	2															2												2	2	2
0	1	10908	109080205	0	2	35	1	5	1	2															2												2	2	2
0	1	10908	109080204	0	2	35	1	5	1	2															2												2	2	2
0	1	10909	109090205	0	2	32	1	6	1	1	2	1					G						G	7	2												2	2	2
0	1	10909	109090206	0	2	32	1	6	1	1	2	1					G						G	7	2												2	2	2
0	1	10909	109090204	0	2	32	1	6	1	2															2												2	2	2
0	1	10910	109100105	0	2	27	2	6	2	1	2	1	D	X		LOCAL HERBS	H						H	5	2												2	2	2
0	1	10910	109100103	0	2	27	2	6	2	1	2	1	D	X		LOCAL HERBS	H						H	3	1	4	1	H						H	7	1	2	2	2
0	1	10910	109100104	0	2	27	2	6	2	1	2	1	D	X		LOCAL HERBS	H						H	2	2												2	2	2
0	1	10911	109110204	0	3	26	1	5	2	2															1	3	1	G						G	0	1	1	2	2	0	3	C
0	1	10911	109110205	0	3	26	1	5	2	1	2	1	D				G						G	0	2												2	2	2
0	1	10912	109120210	0	2	50	1	10	1	2															2												2	2	2
0	1	10912	109120209	0	2	50	1	10	1	2															1	7	1	G						G	3	1	2	2	2
0	1	10914	109140206	0	1	63	1	7	1	2															2												2	2	2
0	1	10914	109140207	0	1	63	1	7	1	2															2												2	2	2
0	1	10915	109150207	0	2	45	1	8	1	2															2												2	2	2
0	1	10915	109150208	0	2	45	1	8	1	2															2												2	2	2
0	1	10916	109160205	0	1	45	1	5	1	2															2												2	2	2
0	1	10916	109160204	0	1	45	1	5	1	2															2												2	2	2
0	1	10917	109170205	0	2	35	1	7	1	2															2												2	2	2
0	1	10917	109170207	0	2	35	1	7	1	2															2												2	2	2
0	1	10918	109180104	0	2	50	2	4		2															2												2	2	2
0	1	10922	109220203	0	2	25	1	3	1	1	1	1	G				D						D	3	2												2	2	2
0	1	10923	109230203	0	2	22	1	3	1	2															2												2	2	2
0	1	10924	109240203	0	2	26	1	5	1	2															1	7	1	D						D	0	1	1	2	2			C
0	1	10924	109240205	0	2	26	1	5	1	1	1	1	X			PIRITEX SYRUP	D						D		2												2	2	2
0	1	10924	109240204	0	2	26	1	5	1	1	2	1	X			PIRITEX SYRUP	D						D		1	7	1	D						D	0	1	1	2	2	0	4	C
0	1	10926	109260209	0	3	42	1	10		2															2												2	2	2
0	1	10926	109260210	0	3	42	1	10	2	2															2												2	2	2
0	1	11001	110010206	0	3	38	1	6	3	1	2	2													2												2	2	2
0	1	11001	110010205	0	3	38	1	6	3	1	1	2													1	7	1	G						G	2	1	2	2	2
0	1	11002	110020203	0	3	40	1	4	4	2															2												2	2	2
0	1	11002	110020204	0	3	40	1	4	4	1	2	1	B	F			A						A		2												2	2	2
0	1	11003	110030206	0	3	40	1	7	2	1	2	1	B				X					FRIEND	X	2	1	3	1	X					FRIEND	X	1	1	2	2	2
0	1	11003	110030207	0	3	40	1	7	2	1	2	1	B				X					FRIEND	X	2	1	3	1	X					FRIEND	X	1	1	2	2	2
0	1	11004	110040205	0	2	32	1	5	2	1	1	1	B	D			G						G	3	1	3	1	G						G	1	1	2	2	2
0	1	11005	110050208	0	2	52	1	9	1	1	2	1	B				X					FRIEND	X	3	1	5	1	X					FRIEND	X	1	1	1	2	2	0	5	B
0	1	11005	110050209	0	2	52	1	9	1	1	2	1	B				X					FRIEND	X	3	1	5	1	X					FRIEND	X	1	1	1	2	2	0	5	B
0	1	11006	110060207	0	2	45	1	10	1	1	1	1	B				X					BLACKS UGANDA	X	2	2												2	2	2
0	1	11006	110060208	0	2	45	1	10	1	1	1	1	B				X					BLACKS UGANDA	X	2	2												2	2	2
0	1	11006	110060206	0	2	45	1	10	1	1	1	1	B				X					BLACKS UGANDA	X	2	1	5	1	X					BLACKS UGANDA	X	2	1	1	2	2	1	1
0	1	11007	110070206	0	3	39	1	6	0	1	1	2	X			MUWUMUZA									1	2	1	D						D	1	1	2	2	2
0	1	11007	110070205	0	3	39	1	6	0	1	2	2	X			MUWUMUZA									2												2	2	2
0	1	11008	110080309	0		63	2	9		2															1	9	2									1	1	2	2		2	C
0	1	11008	110080308	0		63	2	9		2															1	10	2									1	1	2	2	2	2	C
0	1	11008	110080307	0		63	2	9		2															1	5	2									1	1	2	2	2	2	C
0	1	11009	110090209	0	3	37	1	10	1	2															2												2	2	2
0	1	11009	110090210	0	3	37	1	10	1	2															2												2	2	2
0	1	11010	110101003	0	2	26	1	3		2															2												2	2	2
0	1	11014	110141408	0	2	34	2	8		1	2	2	A												2												2	2	2
0	1	11014	110141402	0	2	34	2	8		1	2	2	A												2												2	2	2
0	1	11014	110141403	0	2	34	2	8		1	2	2	A												2												2	2	2
0	1	11015	110150204	0	3	35	1	8	0	2															2												2	2	2
0	1	11015	110150203	0	3	35	1	8	0	1	2		G												2												2	2	2
0	1	11016	110160204	0	3	33	1	5		1	2	1	X			VITAMIN	D						D	7	2												2	2	2
0	1	11016	110160203	0	3	33	1	5		1	2	1	X			VITAMIN	D						D	7	2												2	2	2
0	1	11017	110170206	0	3	34	1	6	2	1	1	1	D				G						G	0	2												2	2	2
0	1	11018	110180206	0	3	36	1	7	1	2															2												2	2	2
0	1	11018	110180205	0	3	36	1	7	1	2															2												2	2	2
0	1	11019	110190203	0	3	36	1	4	4	2															2												2	2	2
0	1	11019	110190204	0	3	36	1	4	4	1	2	2	E												2												2	2	2
0	1	11020	110200102	0	2	50	2	4	1	2															2												2	2	2
0	1	11020	110200104	0	2	50	2	4	1	1	2	1	E				I						I	3	2												2	2	2
0	1	11020	110200103	0	2	50	2	4	1	2															2												2	2	2
0	1	11021	110210203	0	3	25	1	3	2	1	1	1	D				G						G	0	2												2	2	2
0	1	11022	110220206	0	3	34	1	7	2	2															2												2	2	2
0	1	11022	110220207	0	3	34	1	7	2	1	1	1	C	G			G						G	3	2												2	2	2
0	1	11023	110230203	0	3	35	1	4		2															1	14	1	A						A	2	1	2	2	2
0	1	11023	110230204	0	3	35	1	4	1	2															2												2	2	2
0	1	11024	110240304	0	3	58	1	7	3	2															2												2	2	2
[truncated: 6,142 more rows]
[truncated: 10 more columns]
